# Supplementary material
Source: MDPI journal article supplement (https://www.mdpi.com/1424-8247/14/6/547)
Supplement: s1 [file s1]

## Supplementary Information (SI)

### Design, synthesis, *in vitro* and *in vivo* evaluation of heterobivalent SiFAlin-coupled peptidic radioligands targeting both $\alpha_v\beta_3$ -integrin and MC1-receptor – Suitable for the specific visualization of melanomas?

Xia Cheng <sup>1</sup>, Ralph Hübner <sup>2</sup>, Valeska von Kiedrowski <sup>1</sup>, Gert Fricker <sup>3</sup>, Ralf Schirmacher <sup>4</sup>, Carmen Wängler <sup>2,\*</sup> and Björn Wängler <sup>1,\*</sup>

- <sup>1</sup> Molecular Imaging and Radiochemistry, Department of Clinical Radiology and Nuclear Medicine, Medical Faculty Mannheim of Heidelberg University, Theodor-Kutzer-Ufer 1-3, 68167 Mannheim, Germany
- <sup>2</sup> Biomedical Chemistry, Department of Clinical Radiology and Nuclear Medicine, Medical Faculty Mannheim of Heidelberg University, Theodor-Kutzer-Ufer 1-3, 68167 Mannheim, Germany
- <sup>3</sup> Institute of Pharmacy and Molecular Biotechnology, University of Heidelberg, Im Neuenheimer Feld 329, 69120 Heidelberg, Germany
- <sup>4</sup> Department of Oncology, Division of Oncological Imaging, University of Alberta, 11560 University Avenue, Edmonton, T6G 1Z2, Alberta, Canada
- \* Correspondence: [Carmen.Waengler@medma.uni-heidelberg.de](mailto:Carmen.Waengler@medma.uni-heidelberg.de); [Bjoern.Waengler@medma.uni-heidelberg.de](mailto:Bjoern.Waengler@medma.uni-heidelberg.de)

## Table of Contents

|                                                                                                                                                |    |
|------------------------------------------------------------------------------------------------------------------------------------------------|----|
| 1. HPLC chromatograms and mass spectra of the peptides <b>7–9</b> and the linker-modified peptides <b>10–21</b> .....                          | 1  |
| 2. NMR and mass spectra of SiFAlin <b>28</b> , SiFAlin-modified framework <b>29</b> and their intermediates <b>22–27</b> .....                 | 16 |
| 3. Mass and <sup>19</sup> F NMR spectra of HBPLs <b>1–6</b> and mass spectra of their intermediates <b>30–35</b> .....                         | 47 |
| 4. Mass data, HPLC chromatograms and mass spectra of peptidic side products <b>a–z</b> .....                                                   | 65 |
| 5. Radio-HPLC chromatograms of [ <sup>18</sup> F] <b>1</b> –[ <sup>18</sup> F] <b>6</b> from the investigation regarding serum stability ..... | 93 |
| 6. Binding curves of the monomeric peptides c(RGDfK) and GG-Nle-c(DHfRWK) .....                                                                | 93 |
| 7. <i>Ex vivo</i> biodistribution data of [ <sup>18</sup> F] <b>2</b> and [ <sup>18</sup> F] <b>4</b> .....                                    | 94 |

# 1. HPLC chromatograms and mass spectra of the peptides 7–9 and the linker-modified peptides 10–21

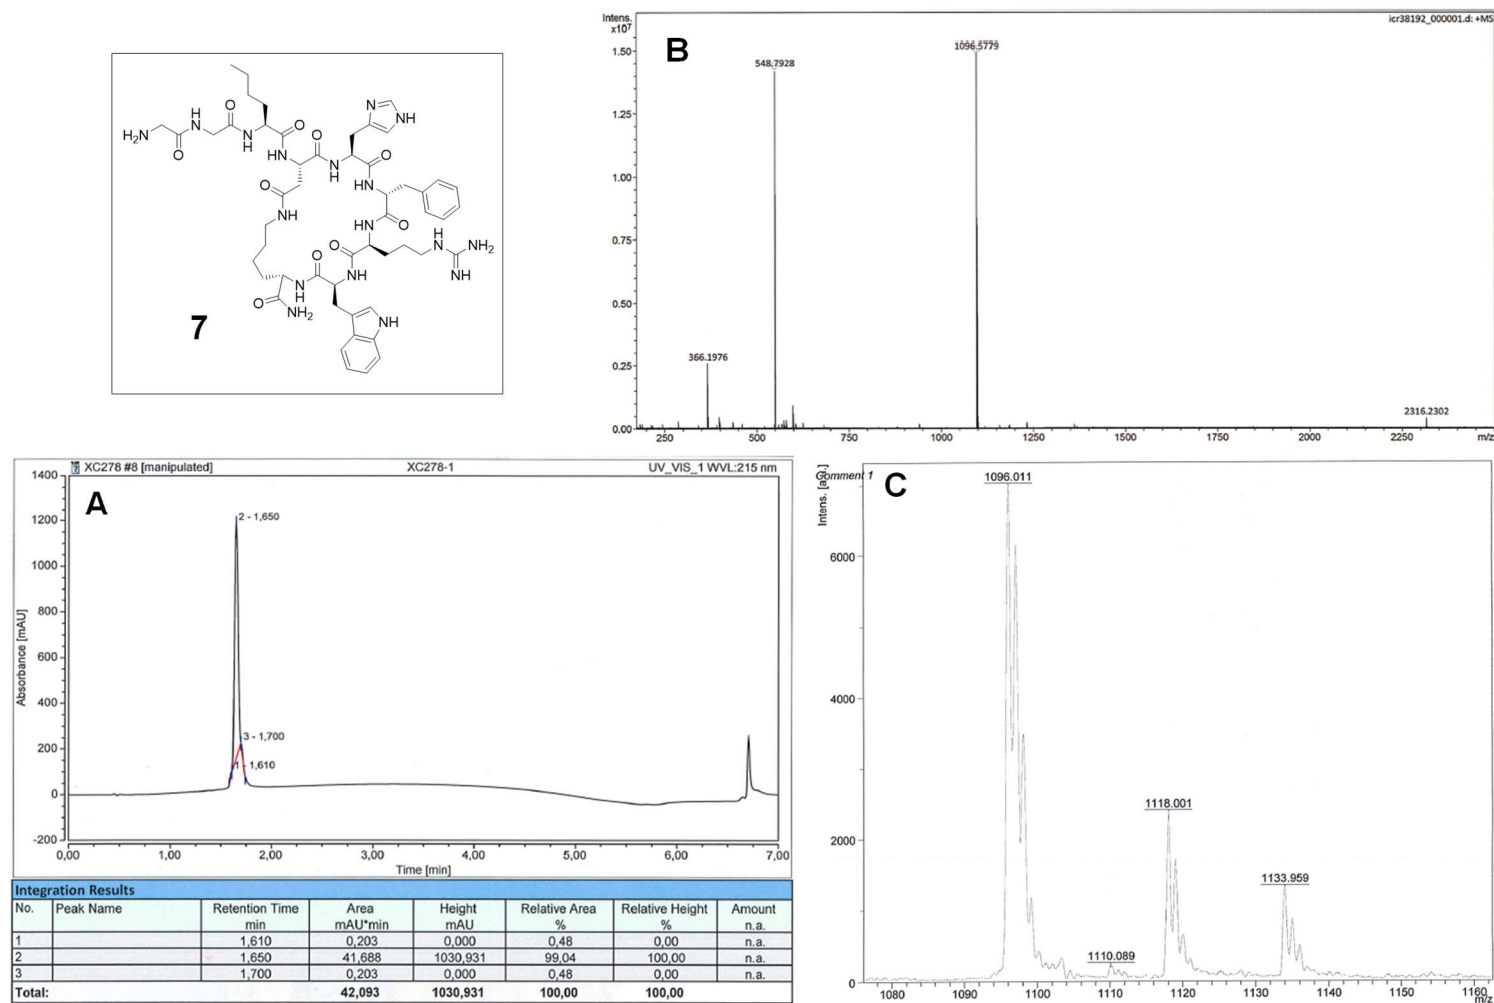

Figure S1. HPLC chromatogram (**A**) and mass spectra (**B**: ESI, **C**: MALDI) of GG-Nle-c(DHfRWK) (**7**).

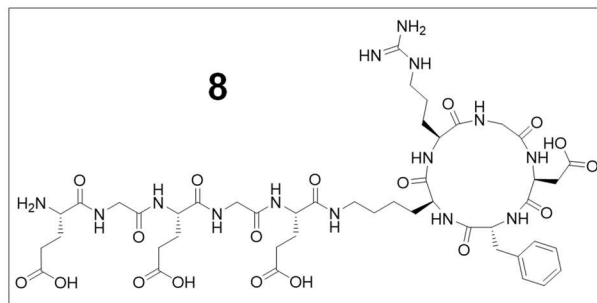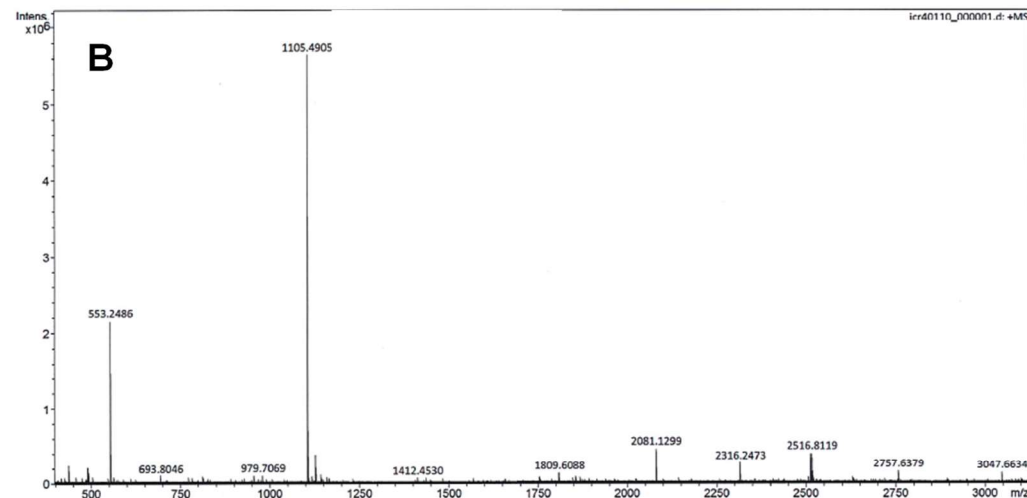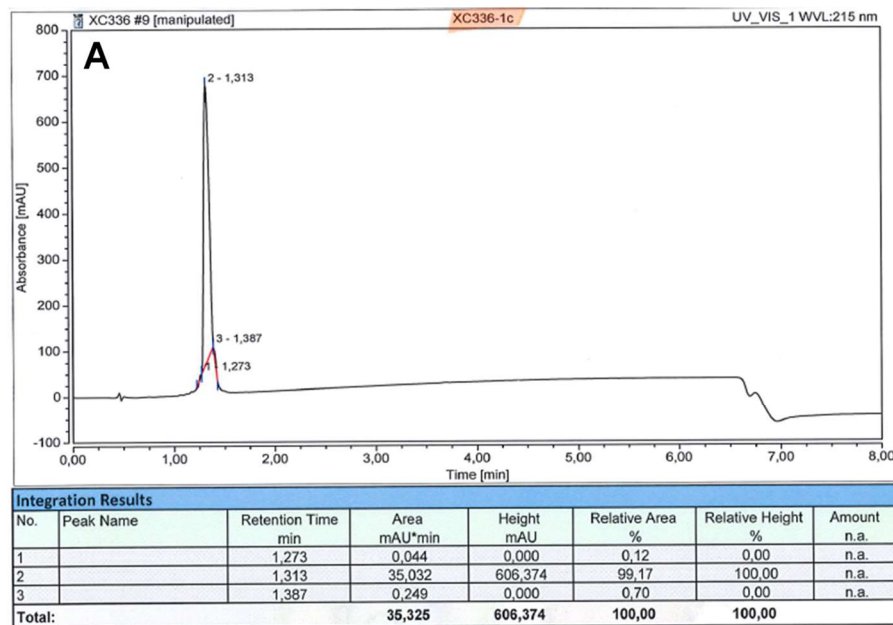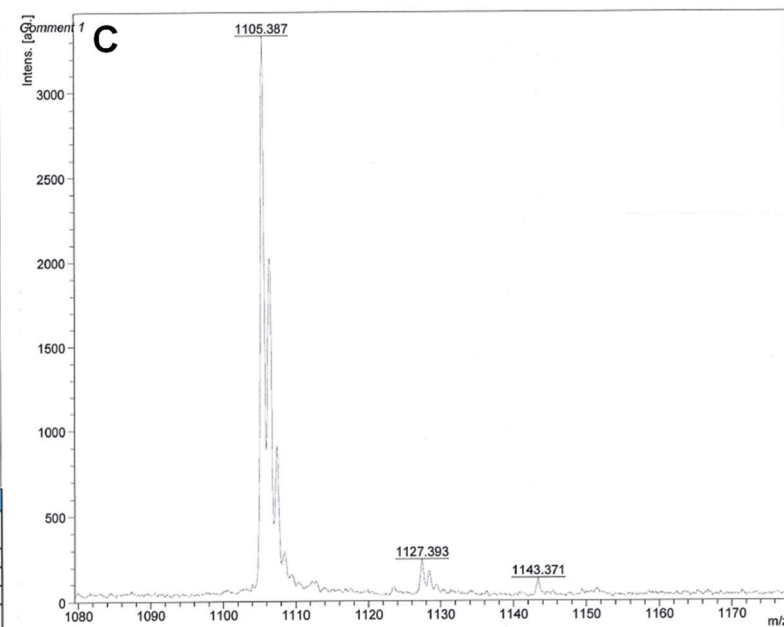

Figure S2. HPLC chromatogram (A) and mass spectra (B: ESI, C: MALDI) of c(RGDfK)-EGEGE (8).

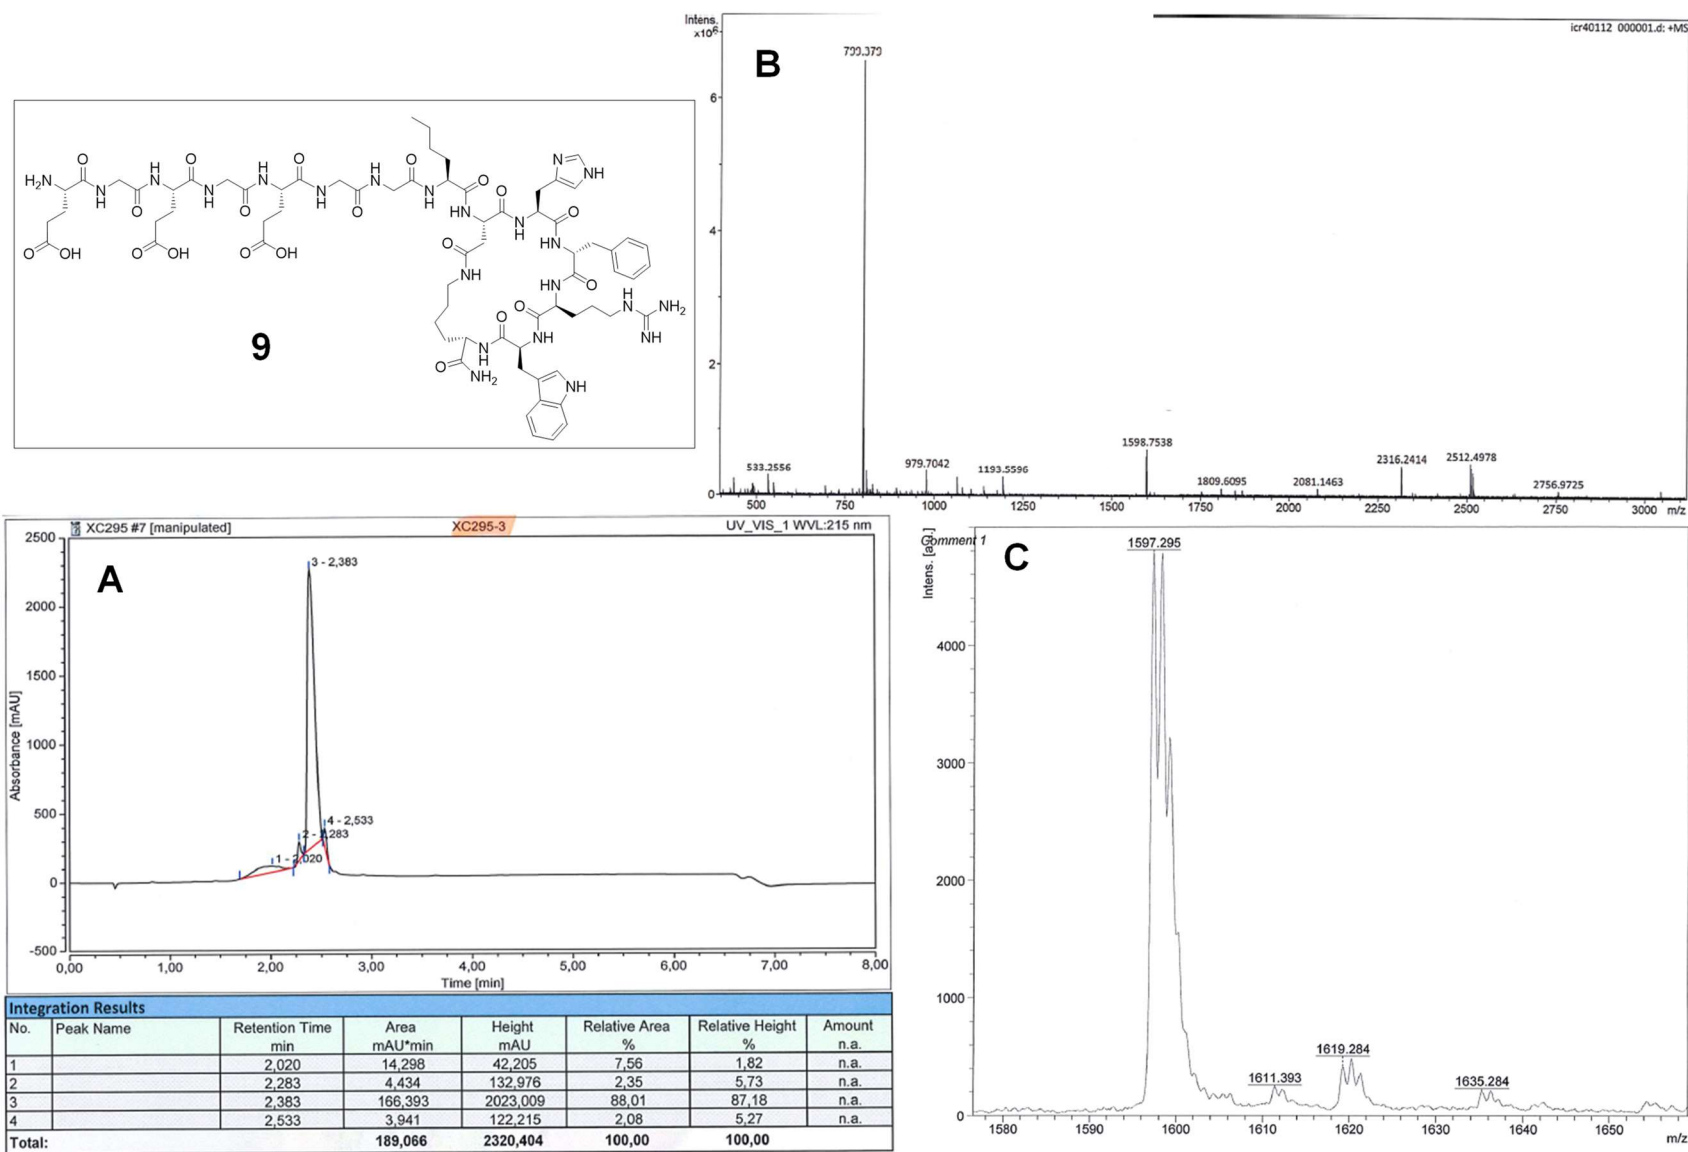

Figure S3. HPLC chromatogram (**A**) and mass spectra (**B**: ESI, **C**: MALDI) of EGE-GE-GG-Nle-c(DHfRWK) (**9**).



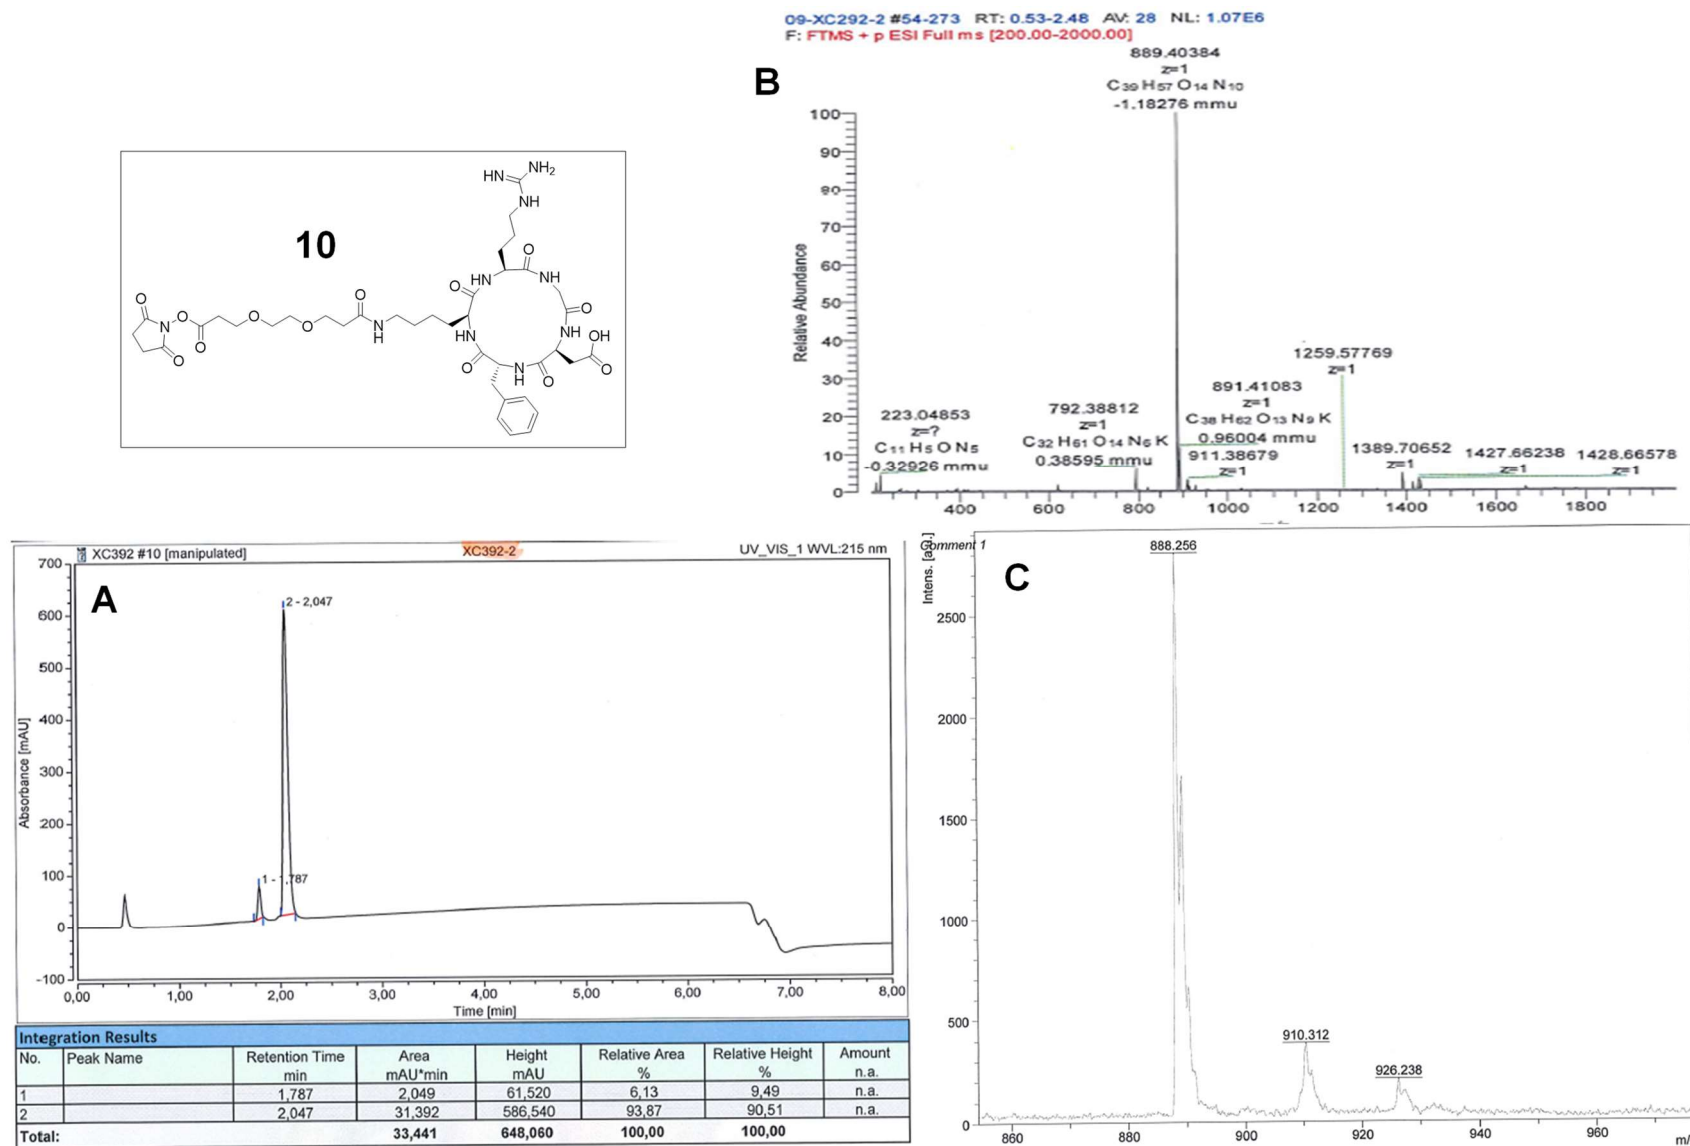

Figure S4. HPLC chromatogram (A) and mass spectra (B: ESI, C: MALDI) of NHS-PEG<sub>1</sub>-c(RGDfK) (10).

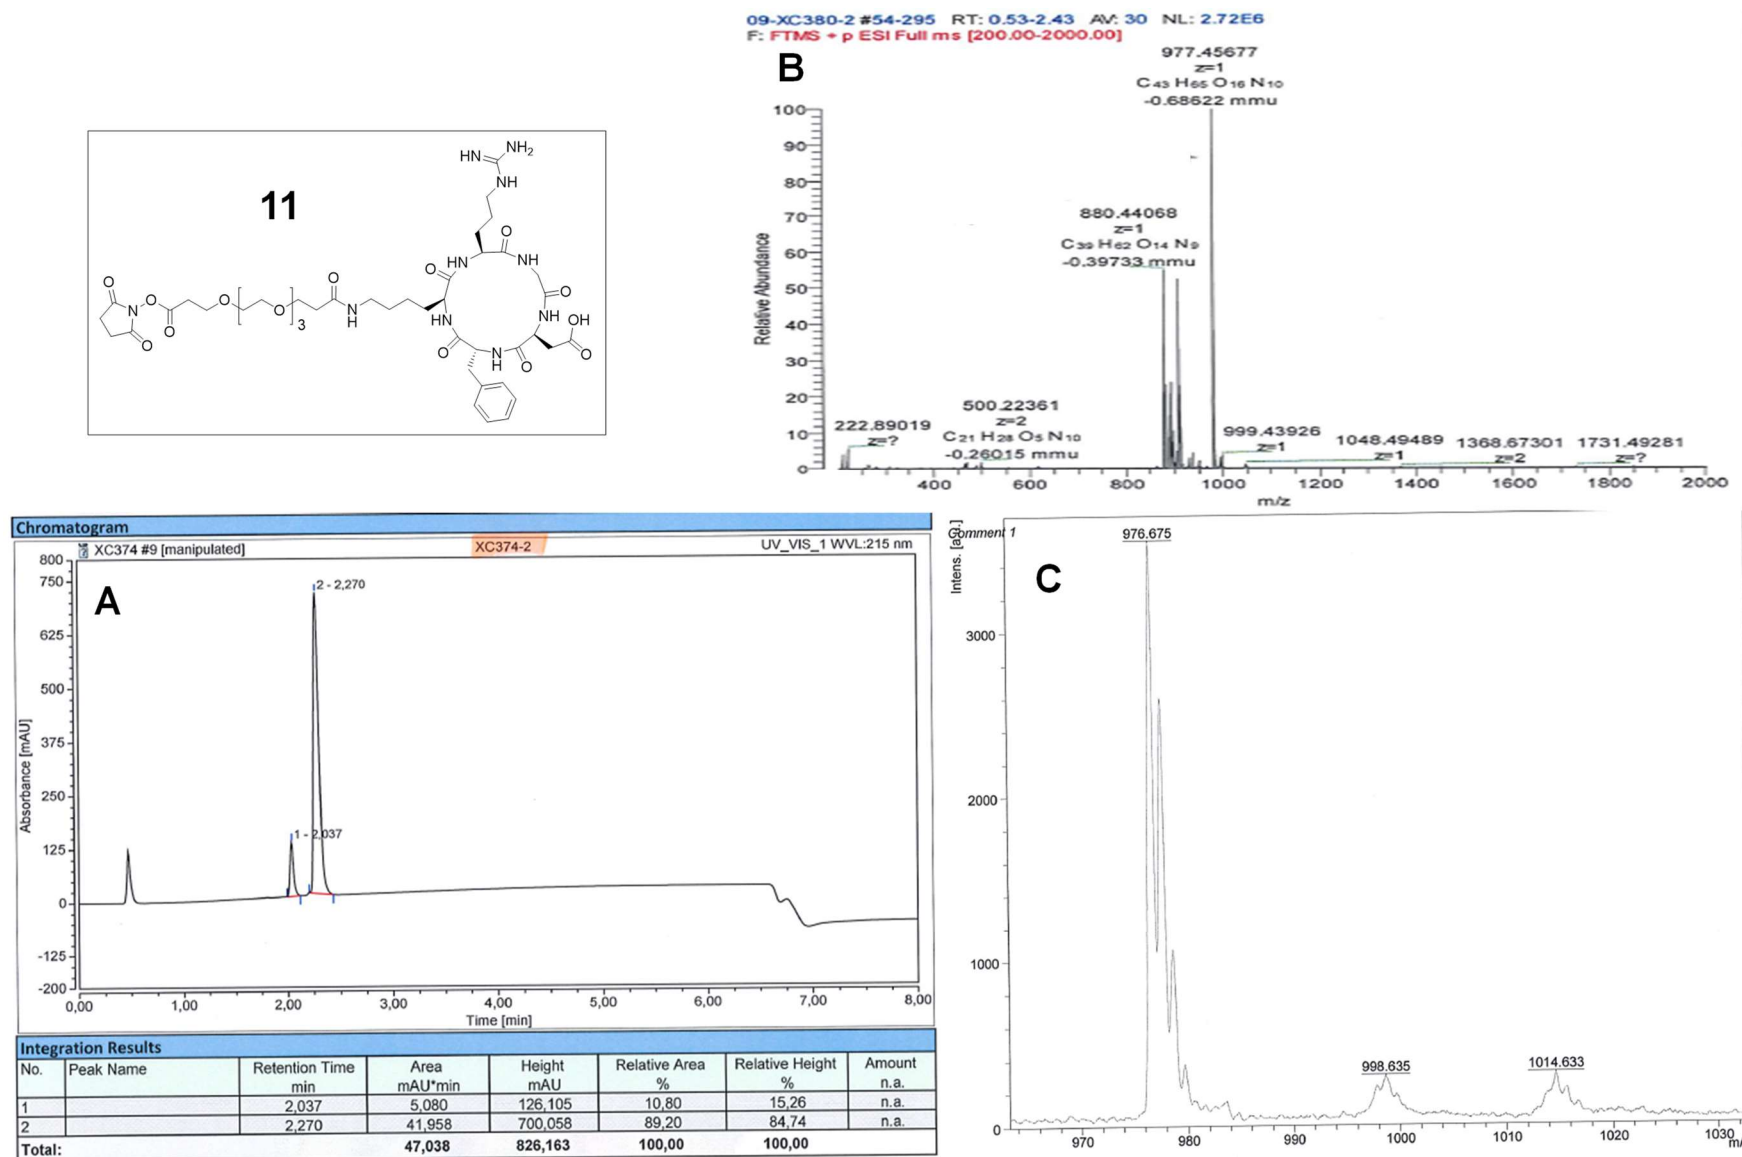

Figure S5. HPLC chromatogram (**A**) and mass spectra (**B**: ESI, **C**: MALDI) of NHS-PEG<sub>3</sub>-c(RGDfK) (**11**).

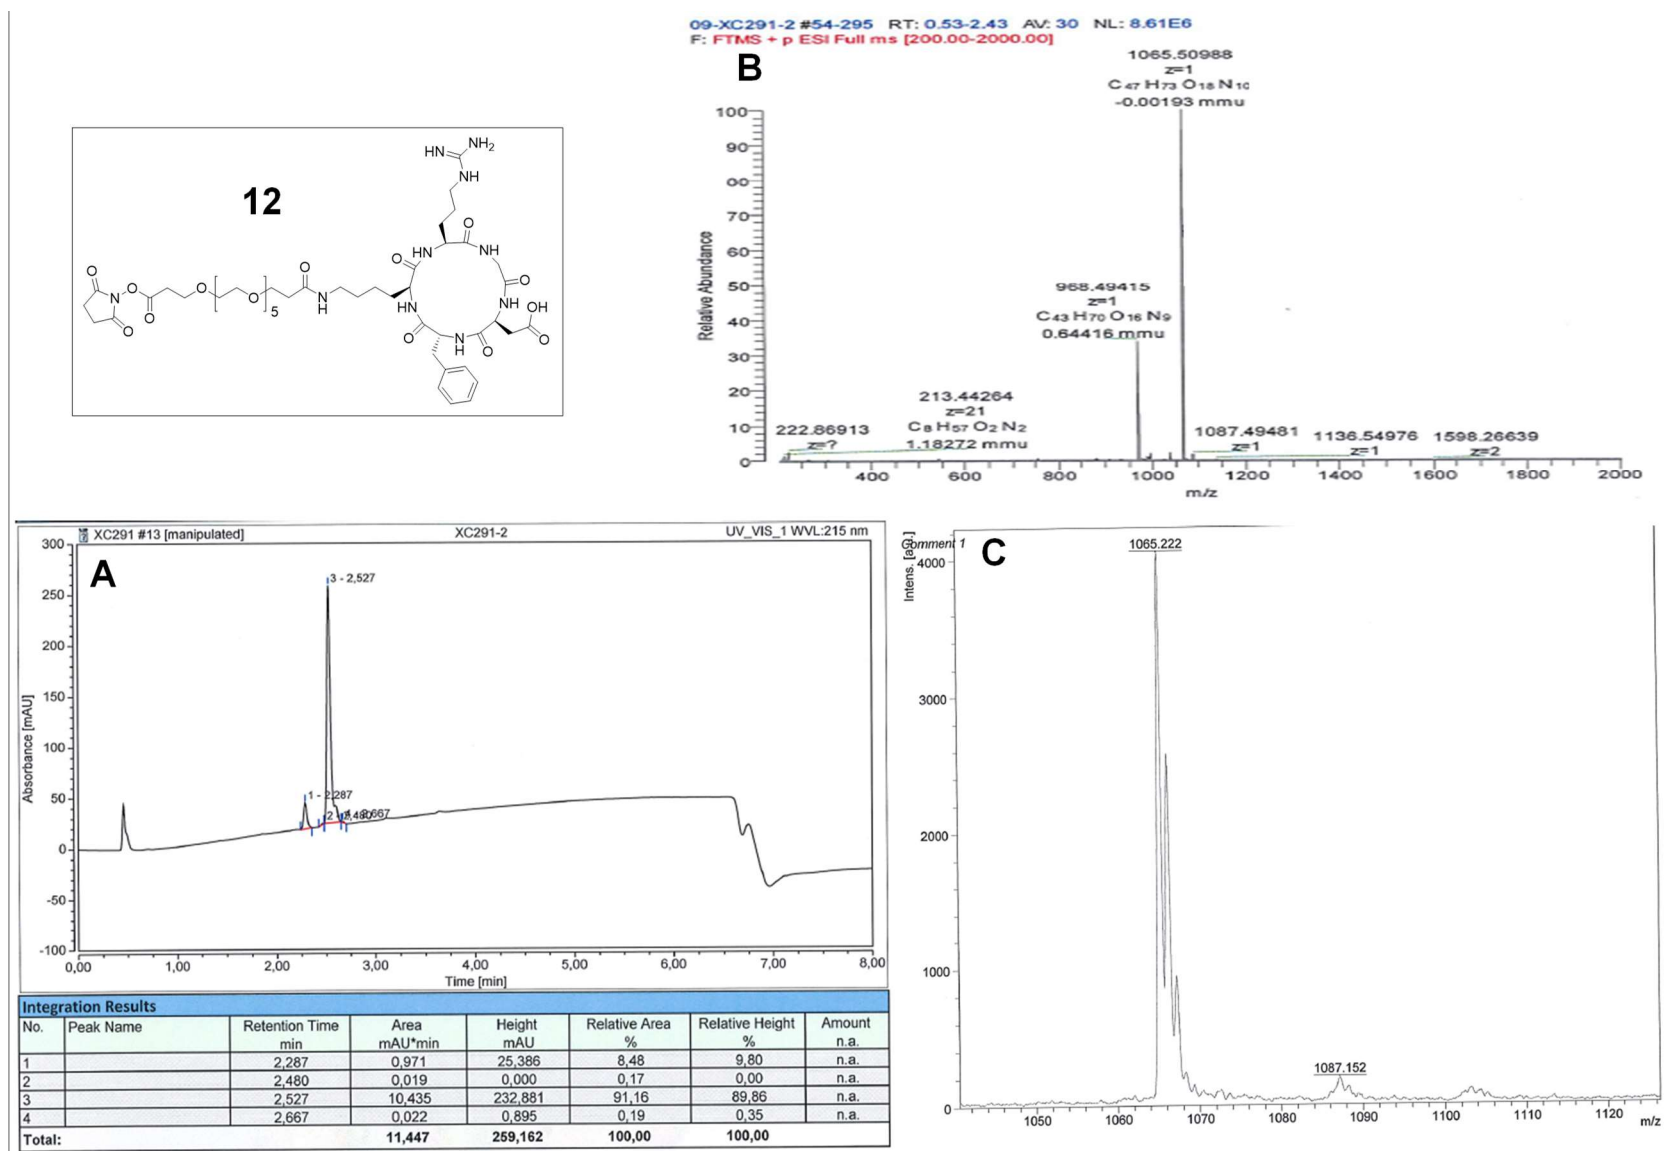

Figure S6. HPLC chromatogram (A) and mass spectra (B: ESI, C: MALDI) of NHS-PEG<sub>5</sub>-c(RGDfK) (12).

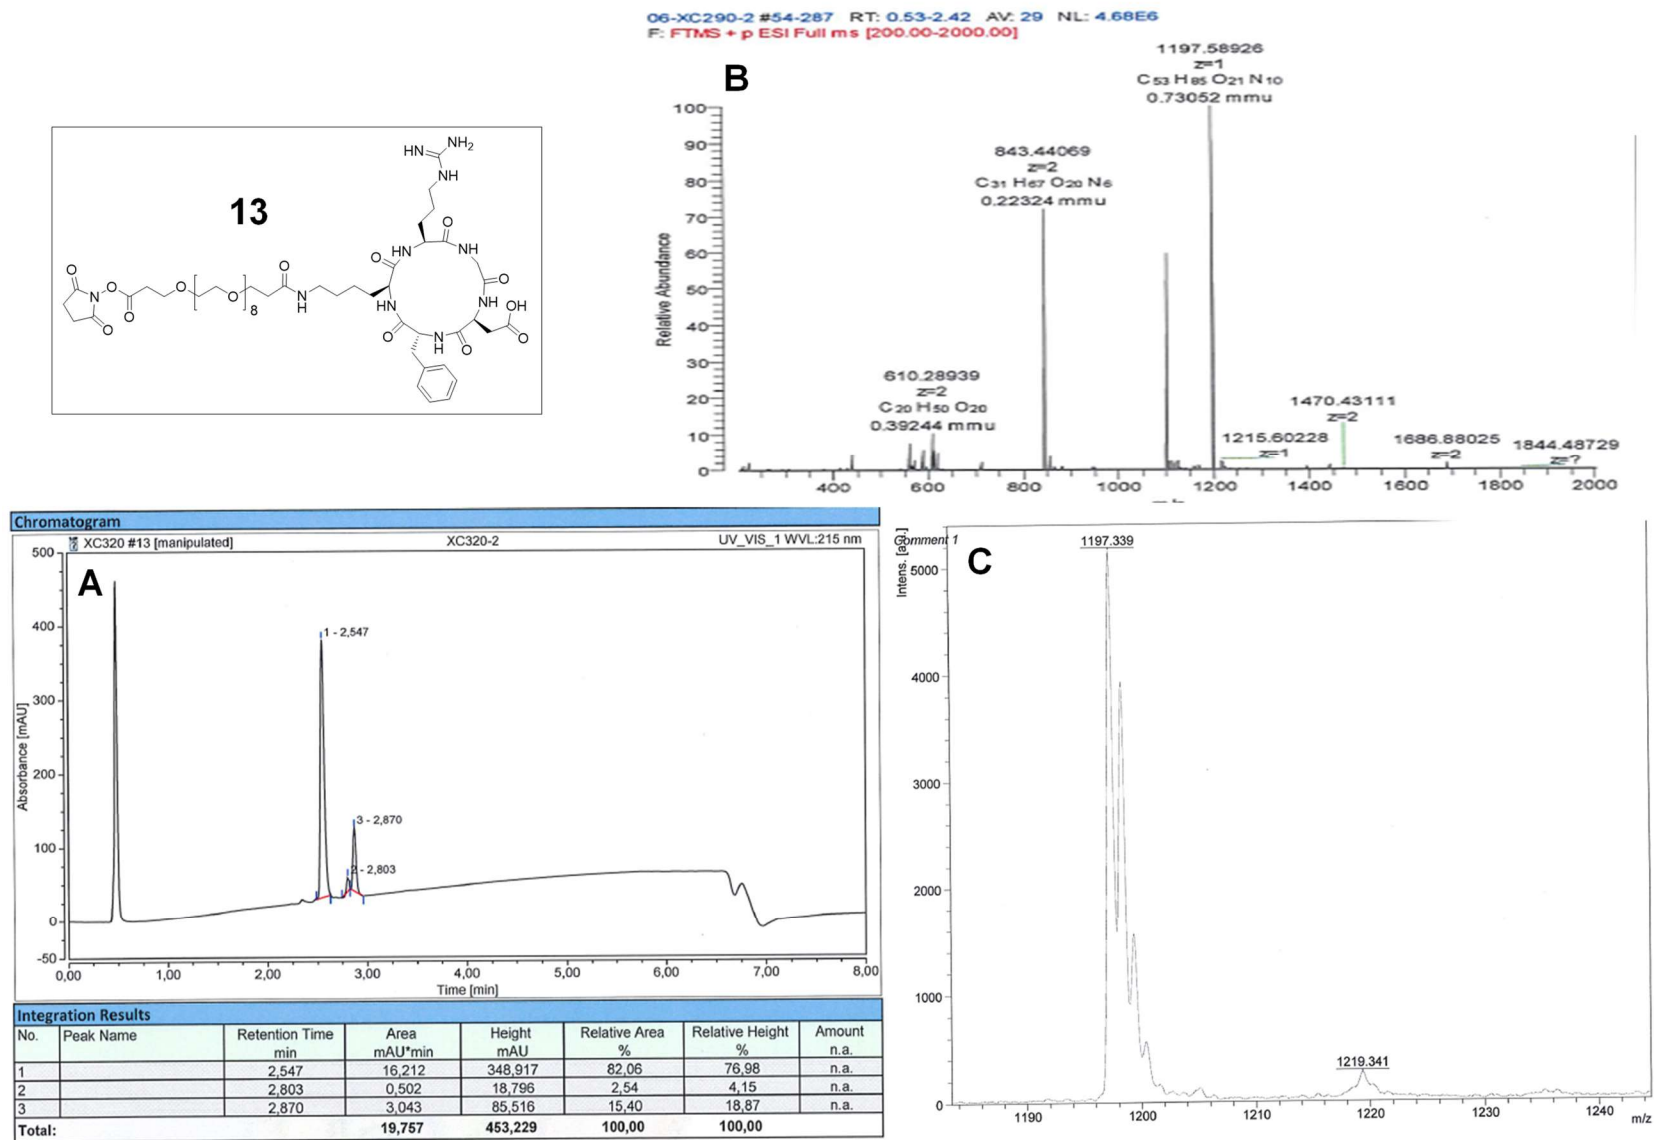

Figure S7. HPLC chromatogram (**A**) and mass spectra (**B**: ESI, **C**: MALDI) of NHS-PEG<sub>8</sub>-c(RGDfK) (**13**).

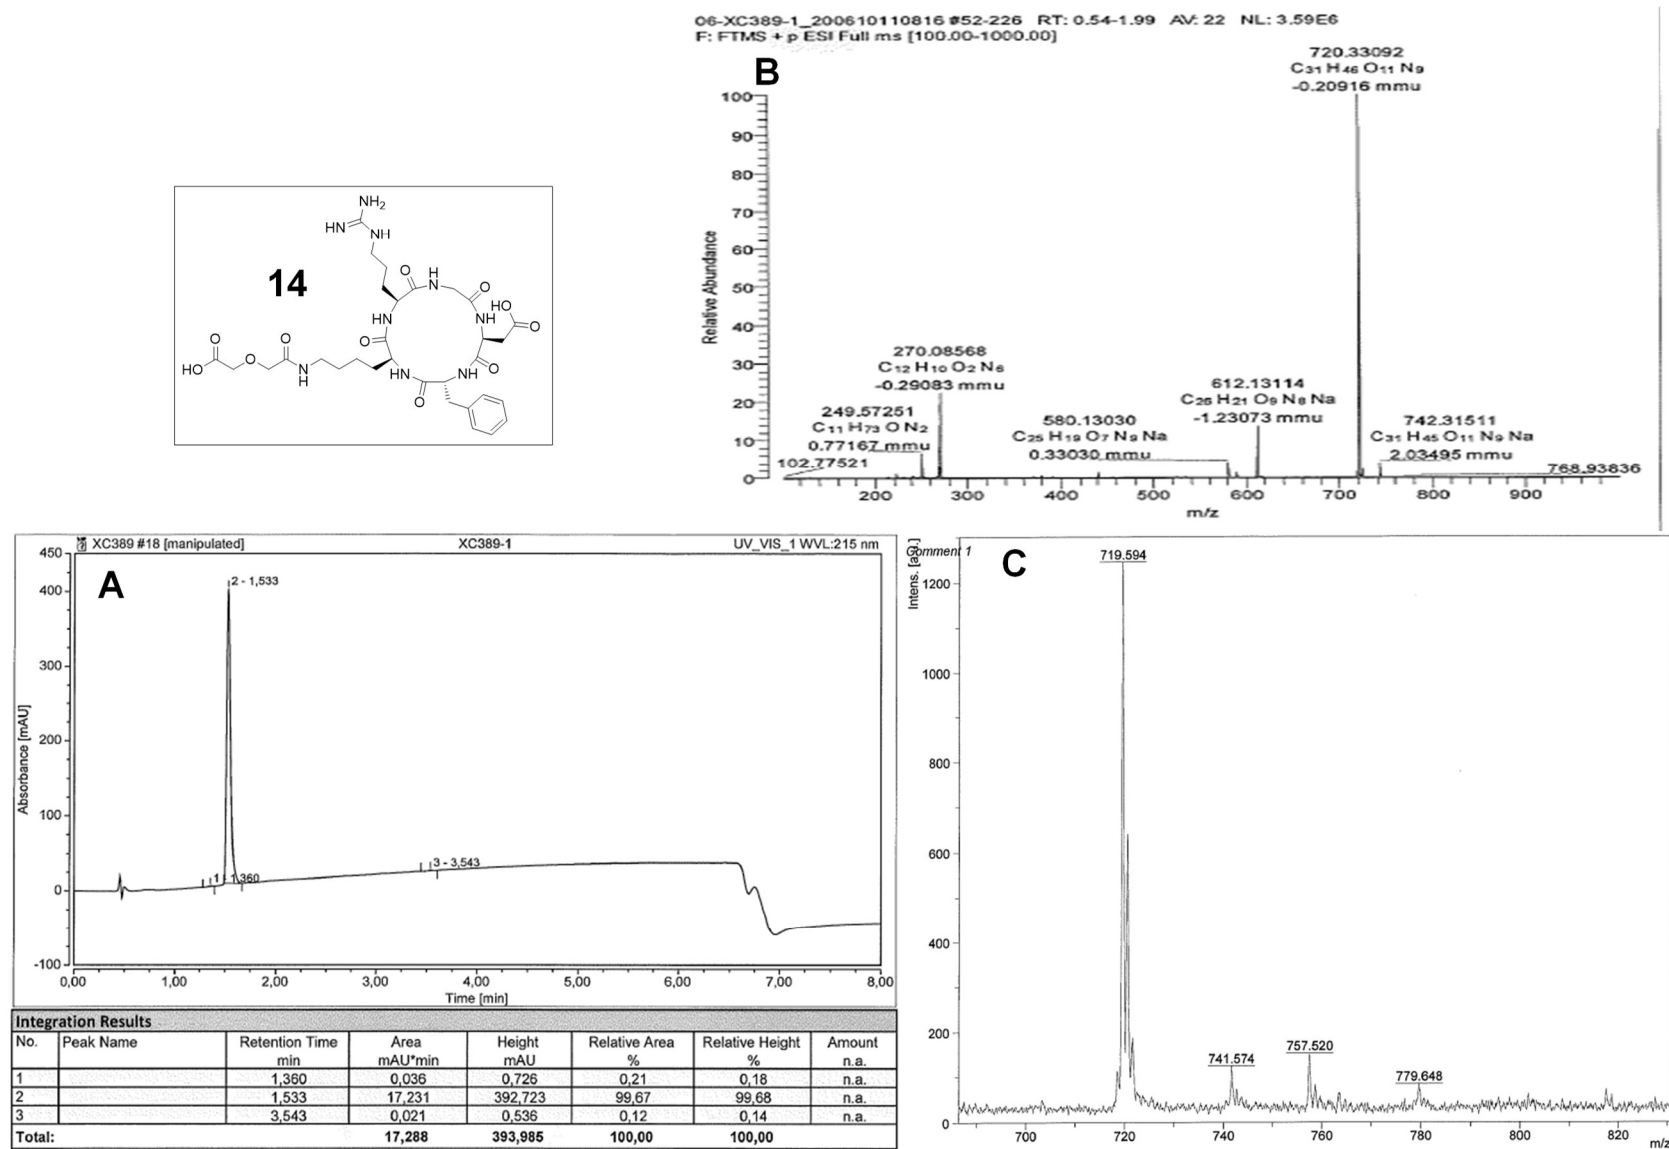

Figure S8. HPLC chromatogram (**A**) and mass spectra (**B**: ESI, **C**: MALDI) of HO-DIG-c(RGDfK) (**14**).

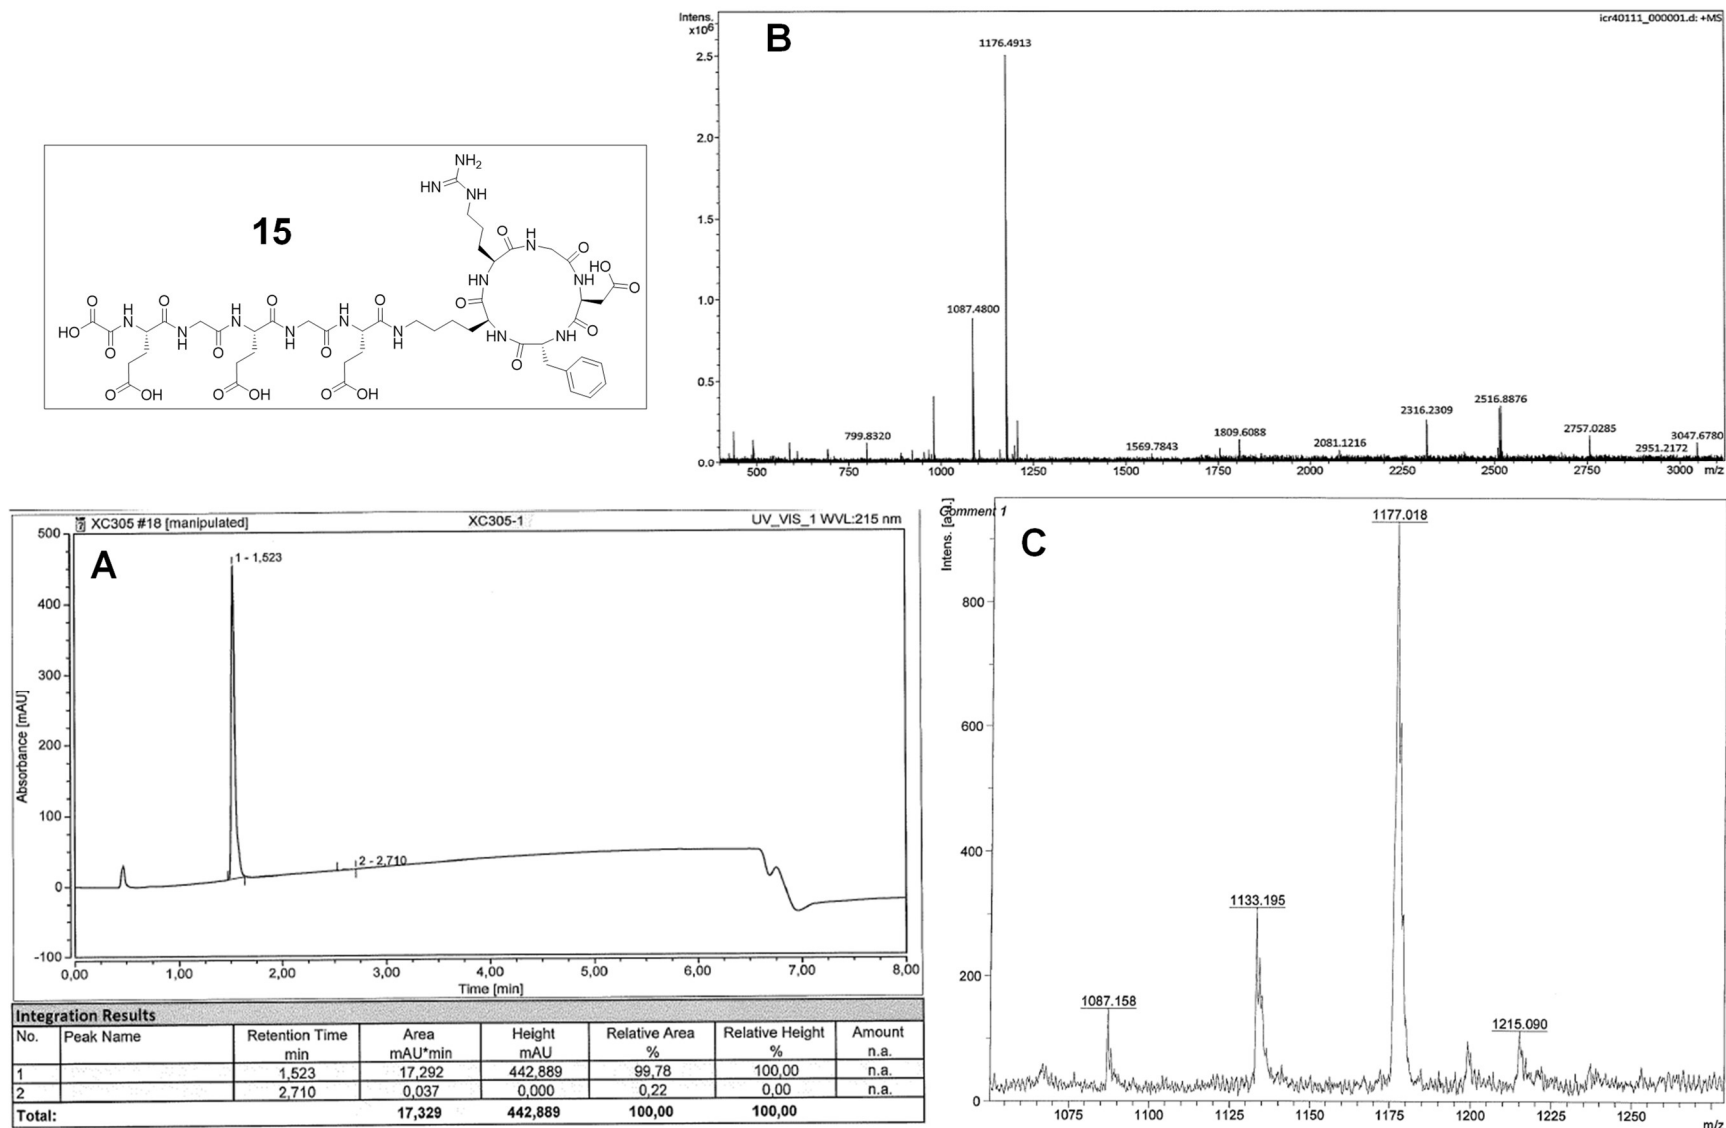

Figure S9. HPLC chromatogram (**A**) and mass spectra (**B**: ESI, **C**: MALDI) of HO-Ox-EGEGE-c(RGDfK) (**15**).

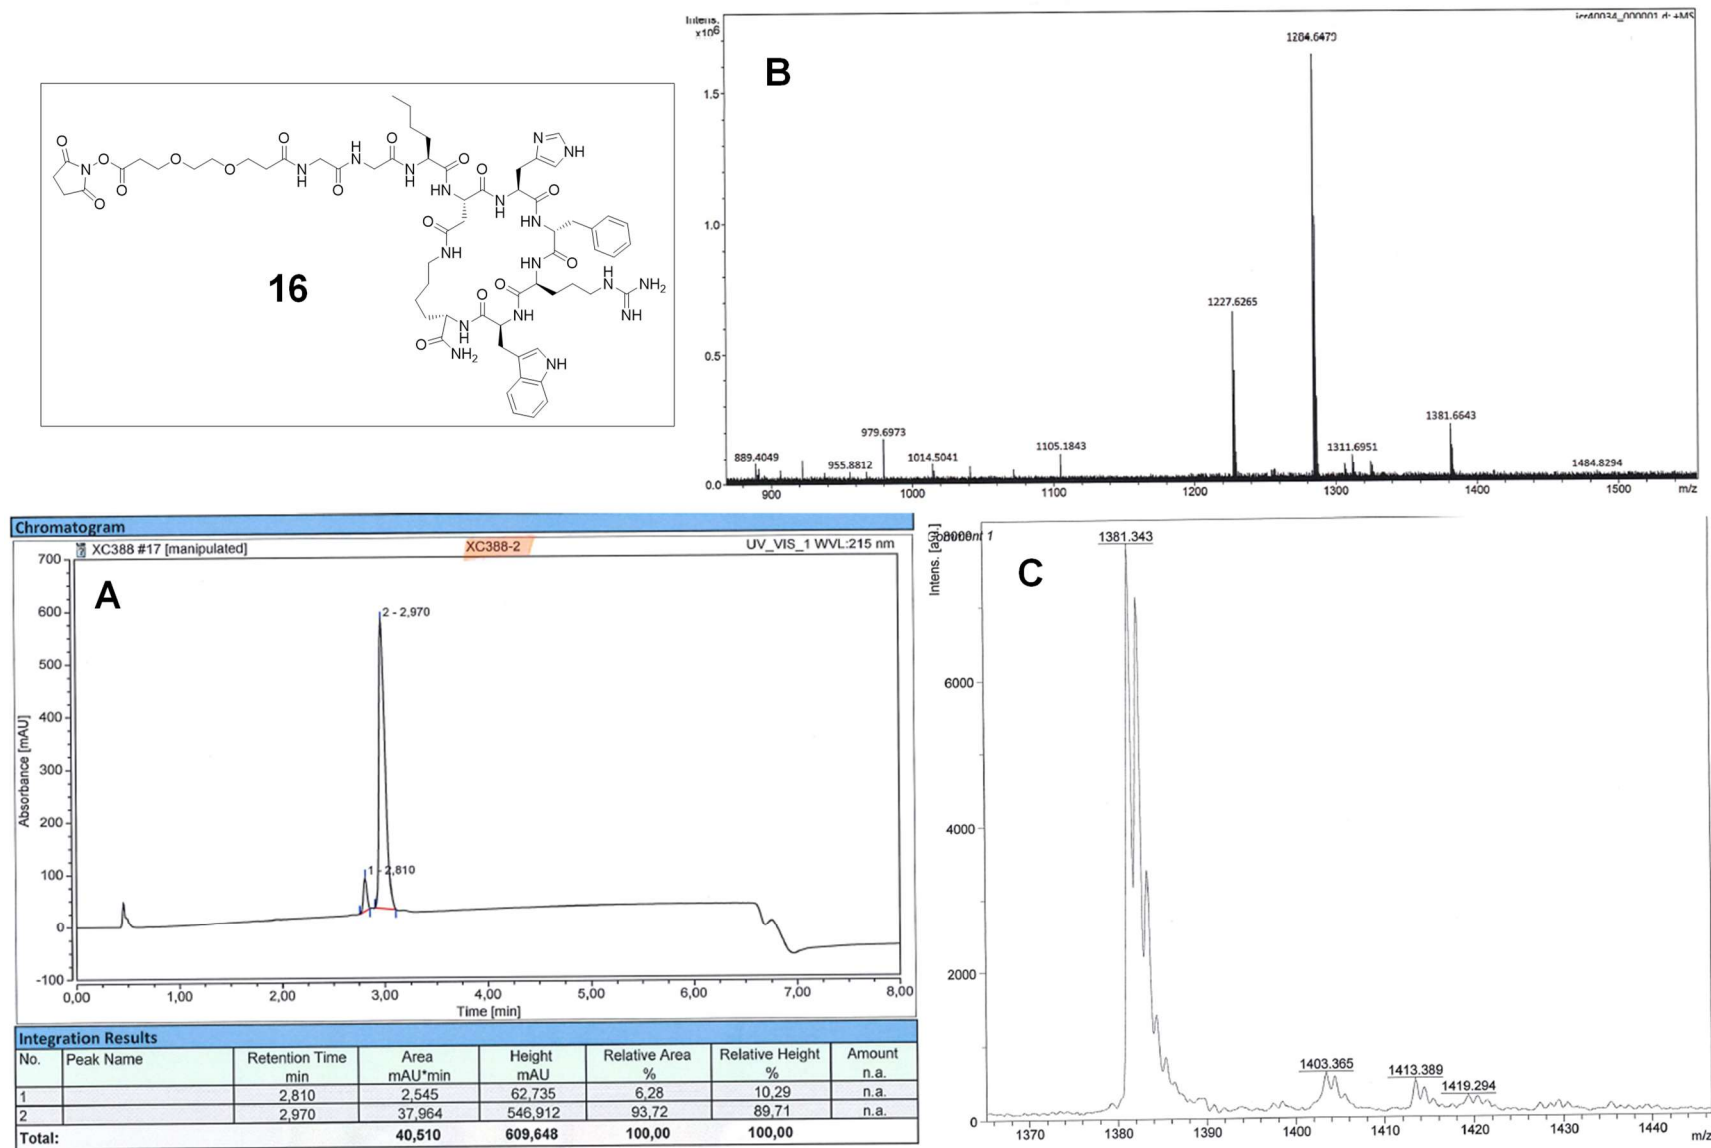

Figure S10. HPLC chromatogram (A) and mass spectra (B: ESI, C: MALDI) of NHS-PEG<sub>1</sub>-GG-Nle-c(DHfRWK) (16).

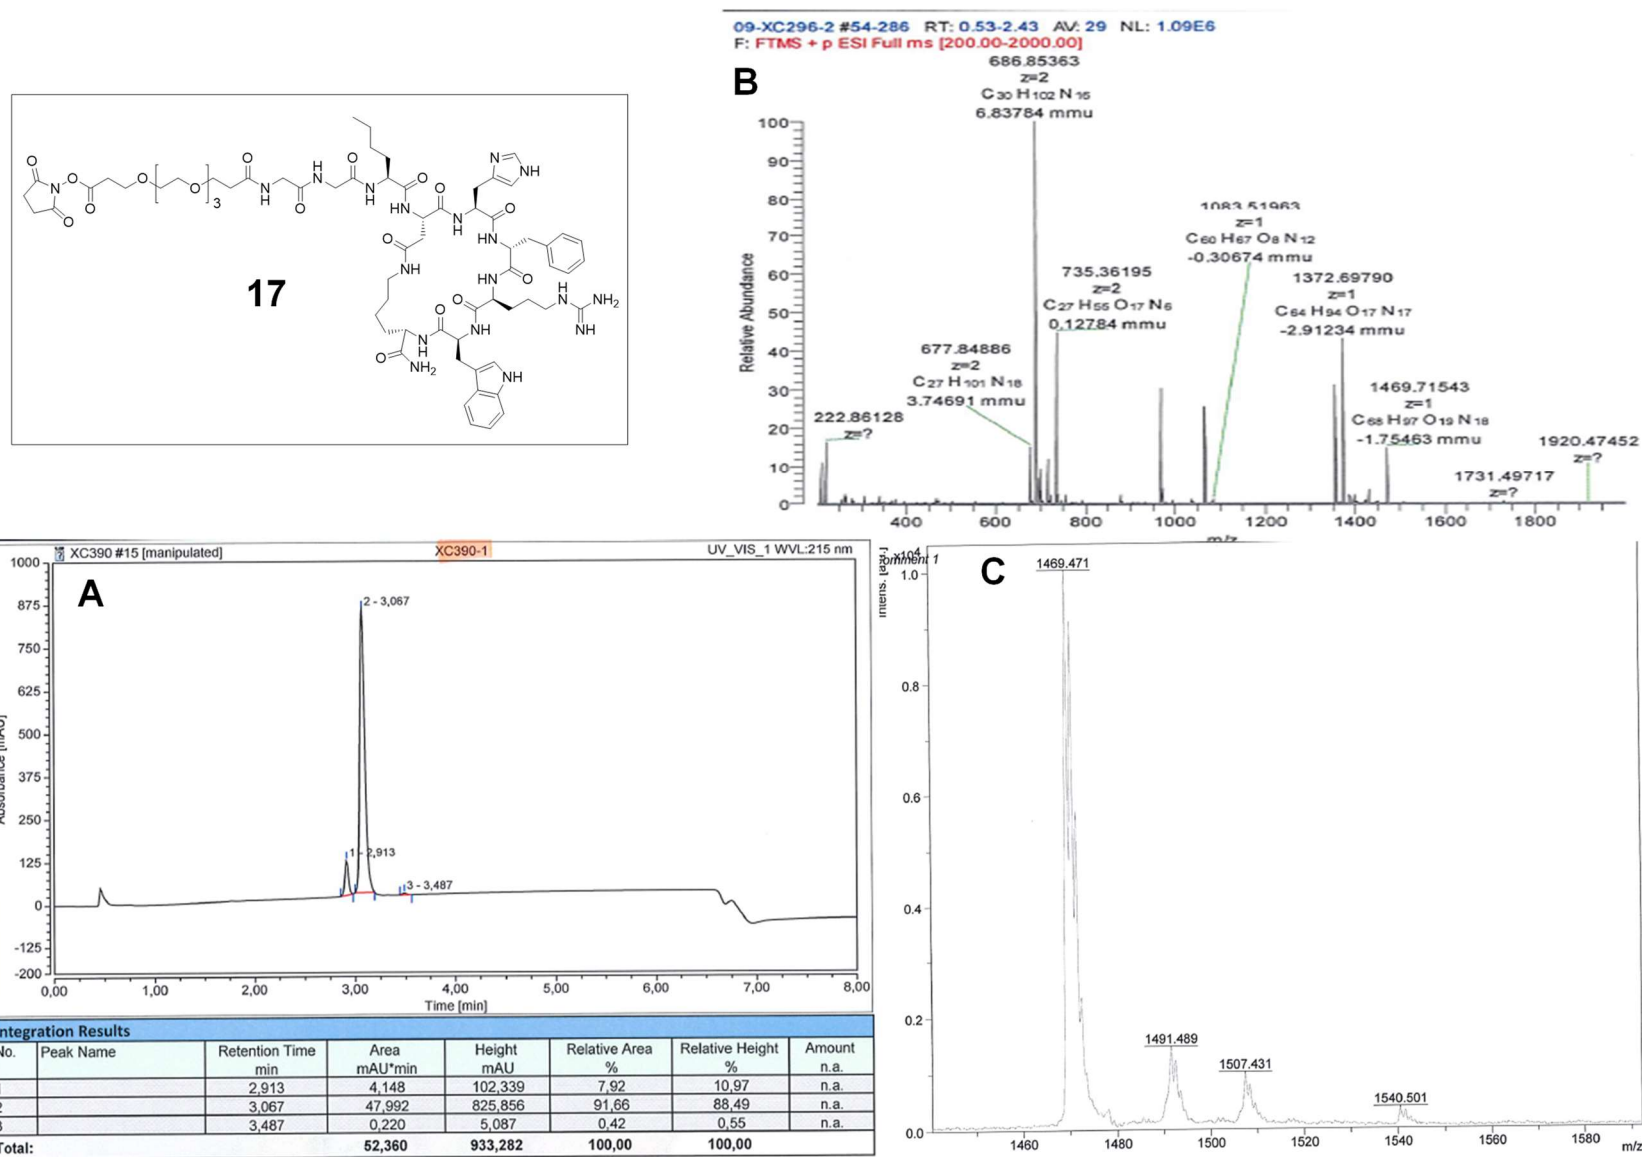

Figure S11. HPLC chromatogram (A) and mass spectra (B: ESI, C: MALDI) of NHS-PEG<sub>3</sub>-GG-Nle-c(DHfRWK) (17).



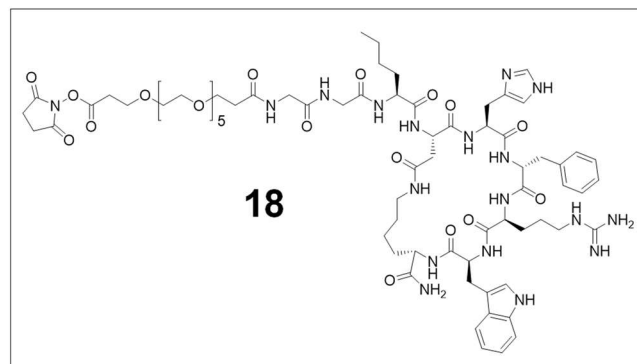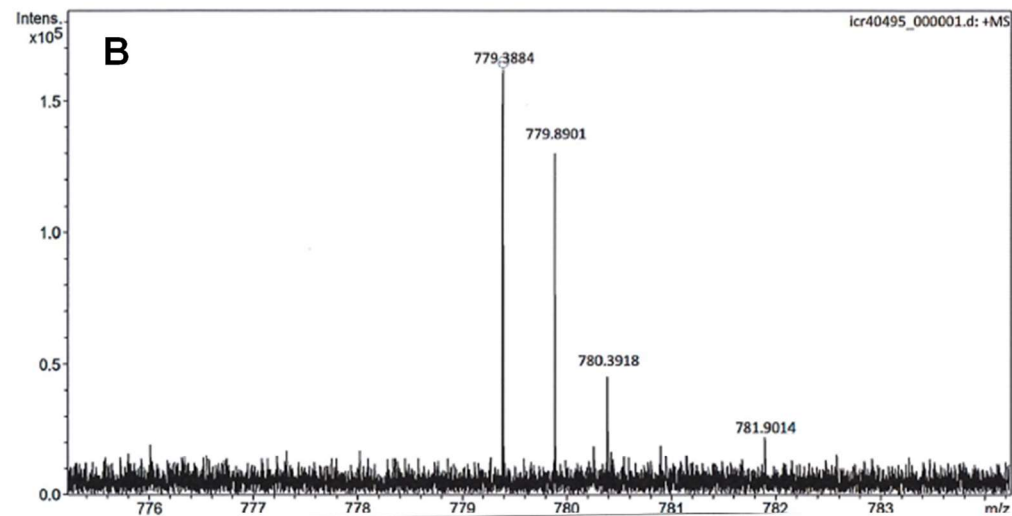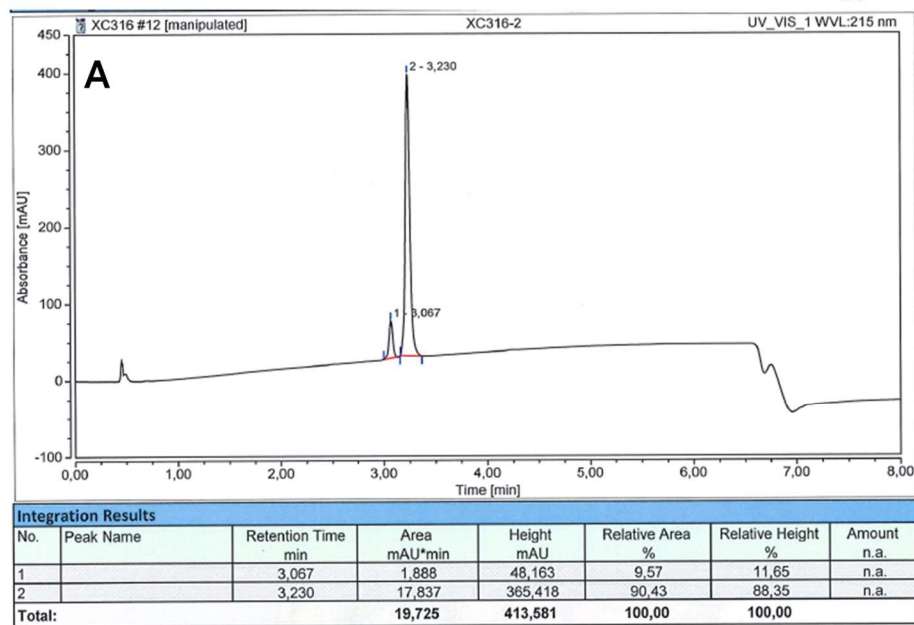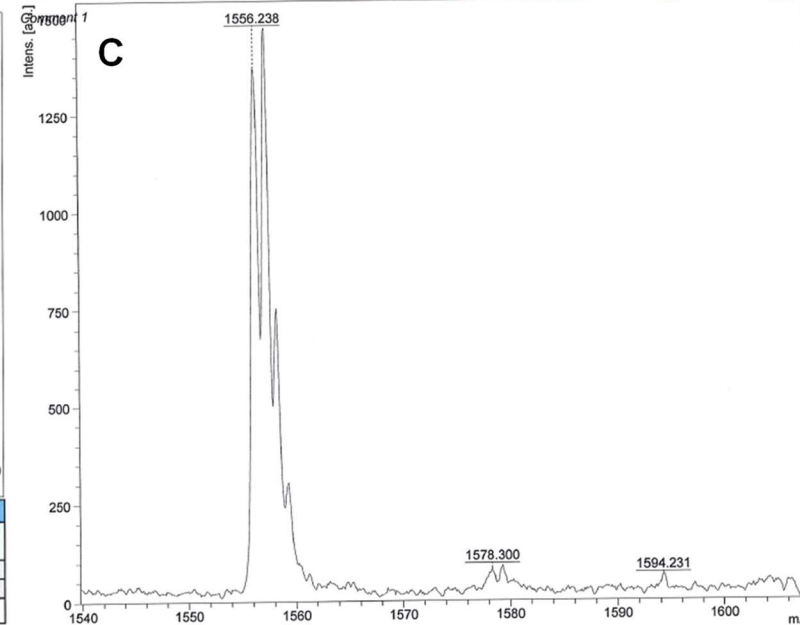

Figure S12. HPLC chromatogram (**A**) and mass spectra (**B**: ESI, **C**: MALDI) of NHS-PEG<sub>5</sub>-GG-Nle-c(DHfRWK) (**18**).

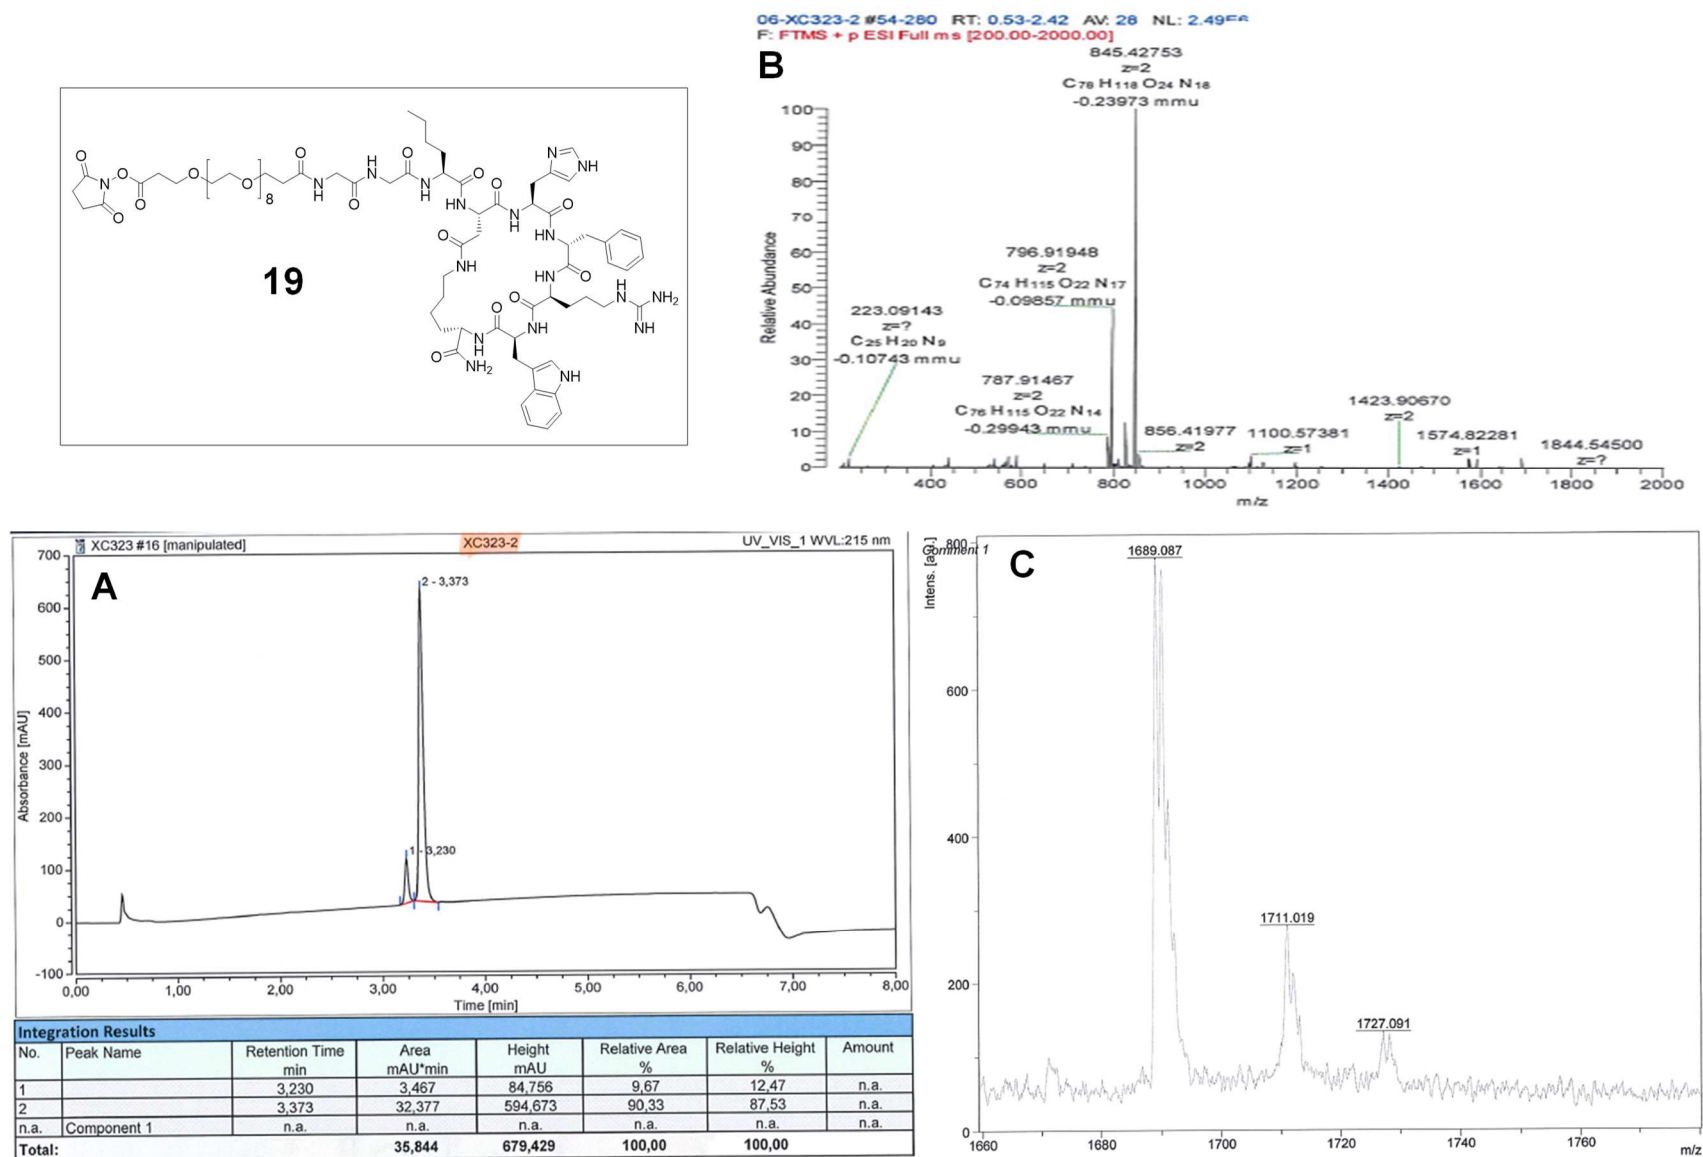

Figure S13. HPLC chromatogram (**A**) and mass spectra (**B**: ESI, **C**: MALDI) of NHS-PEG<sub>8</sub>-GG-Nle-c(DHfRWK) (**19**).

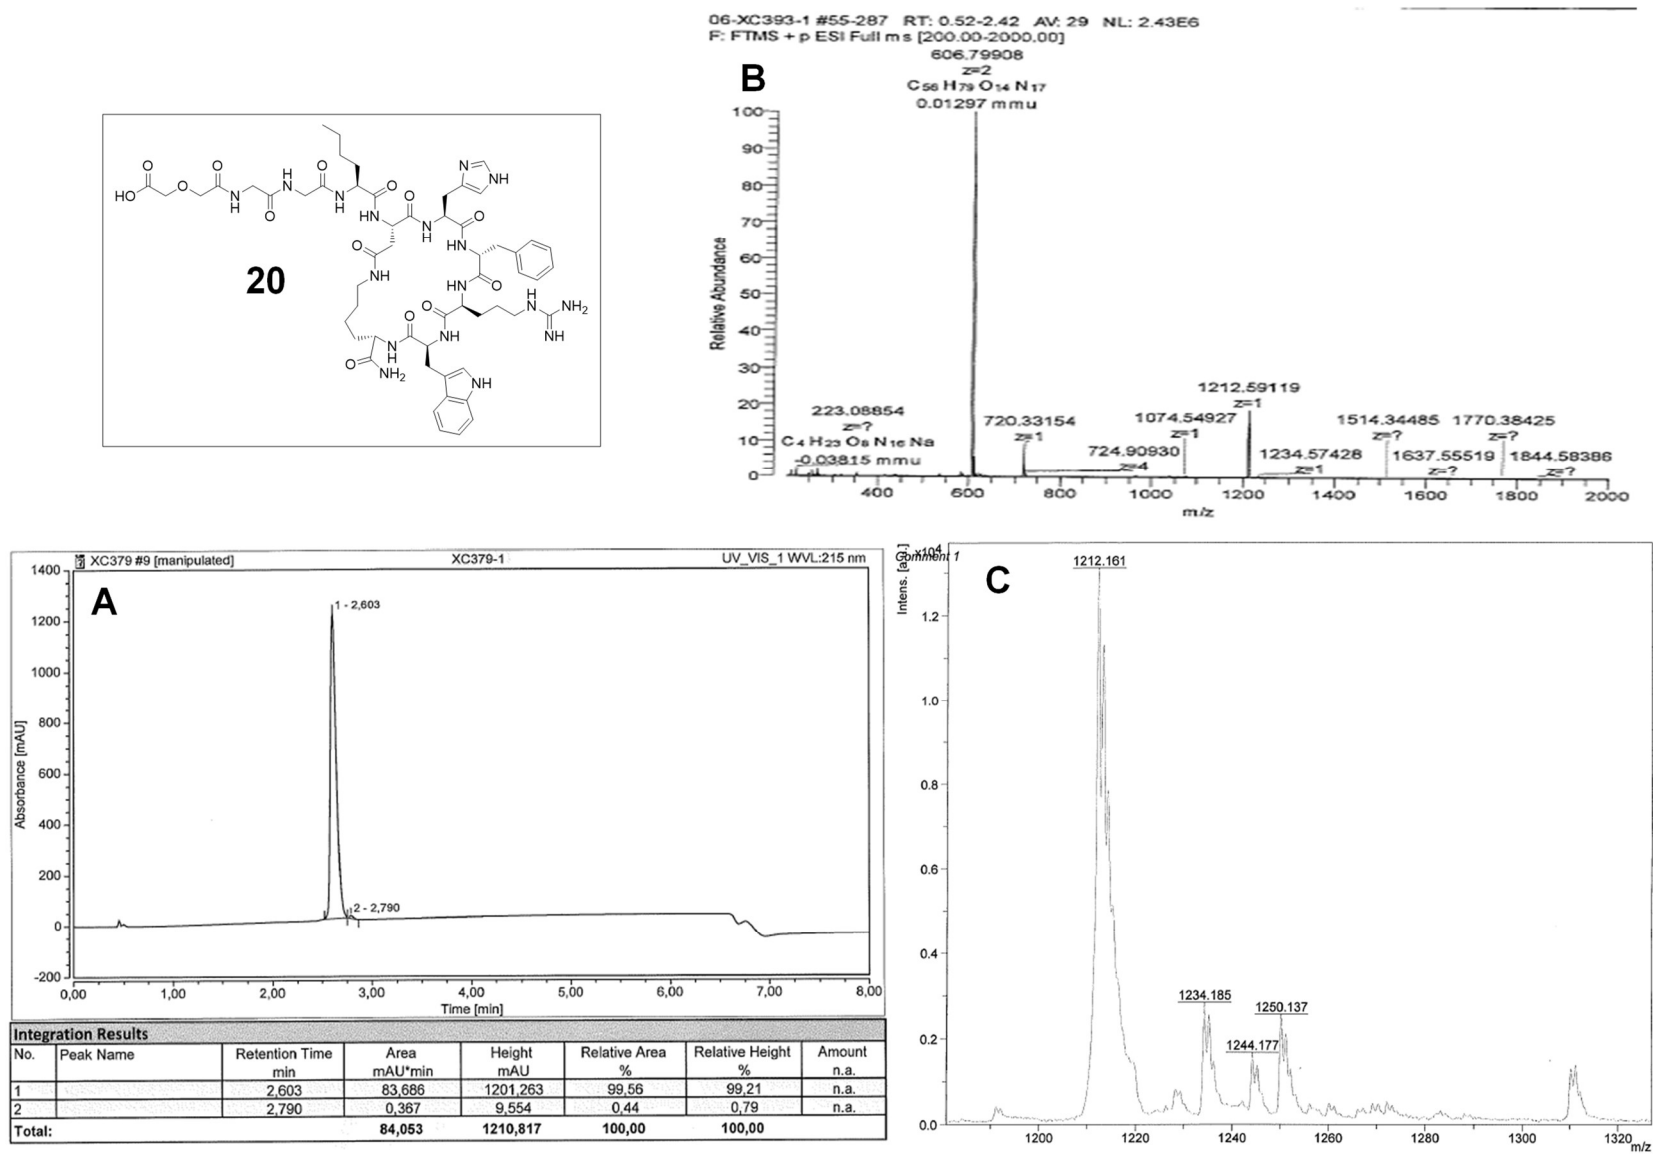

Figure S14. HPLC chromatogram (**A**) and mass spectra (**B**: ESI, **C**: MALDI) of HO-DIG-GG-Nle-c(DHfRWK) (**20**).

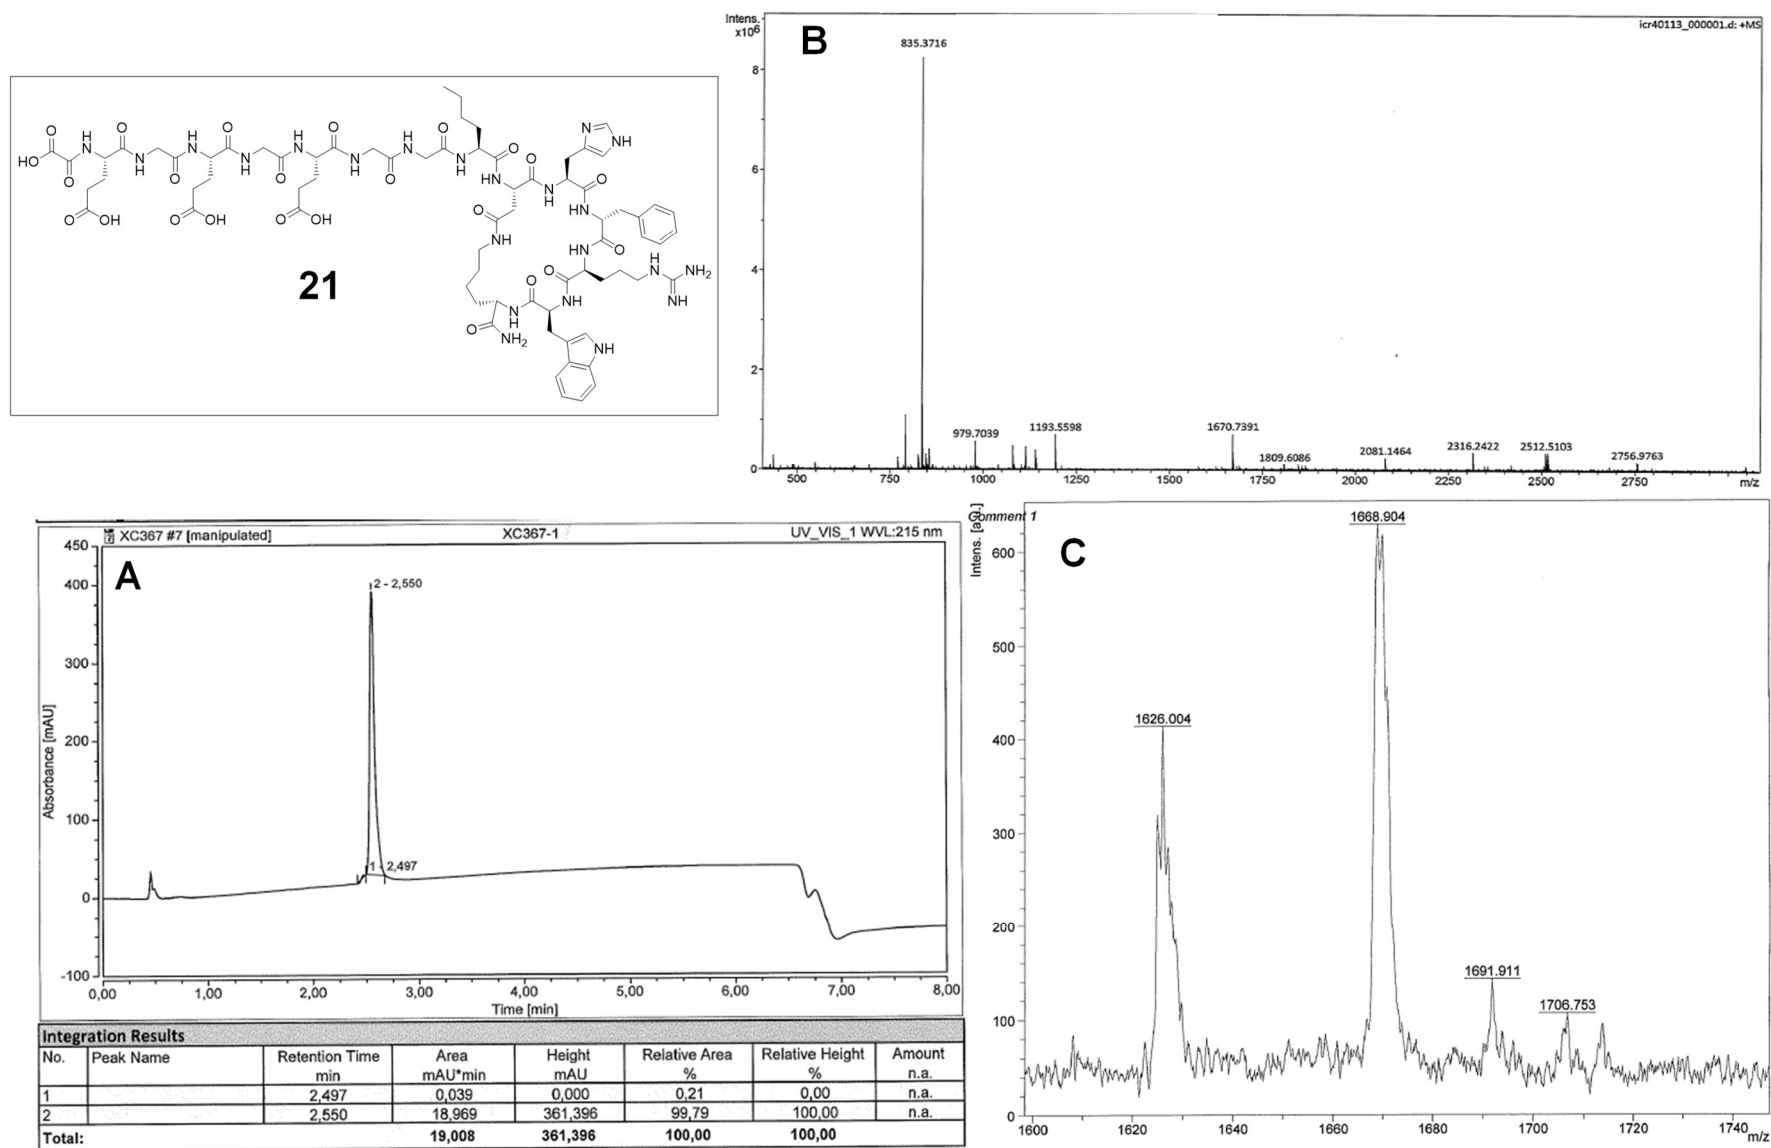

Figure S15. HPLC chromatogram (A) and mass spectra (B: ESI, C: MALDI) of HO-Ox-EGEGE-GG-Nle-c(DHfRWK) (21).

## 2. NMR and mass spectra of SiFAlin 28, SiFAlin-modified framework 29 and their intermediates 22–27

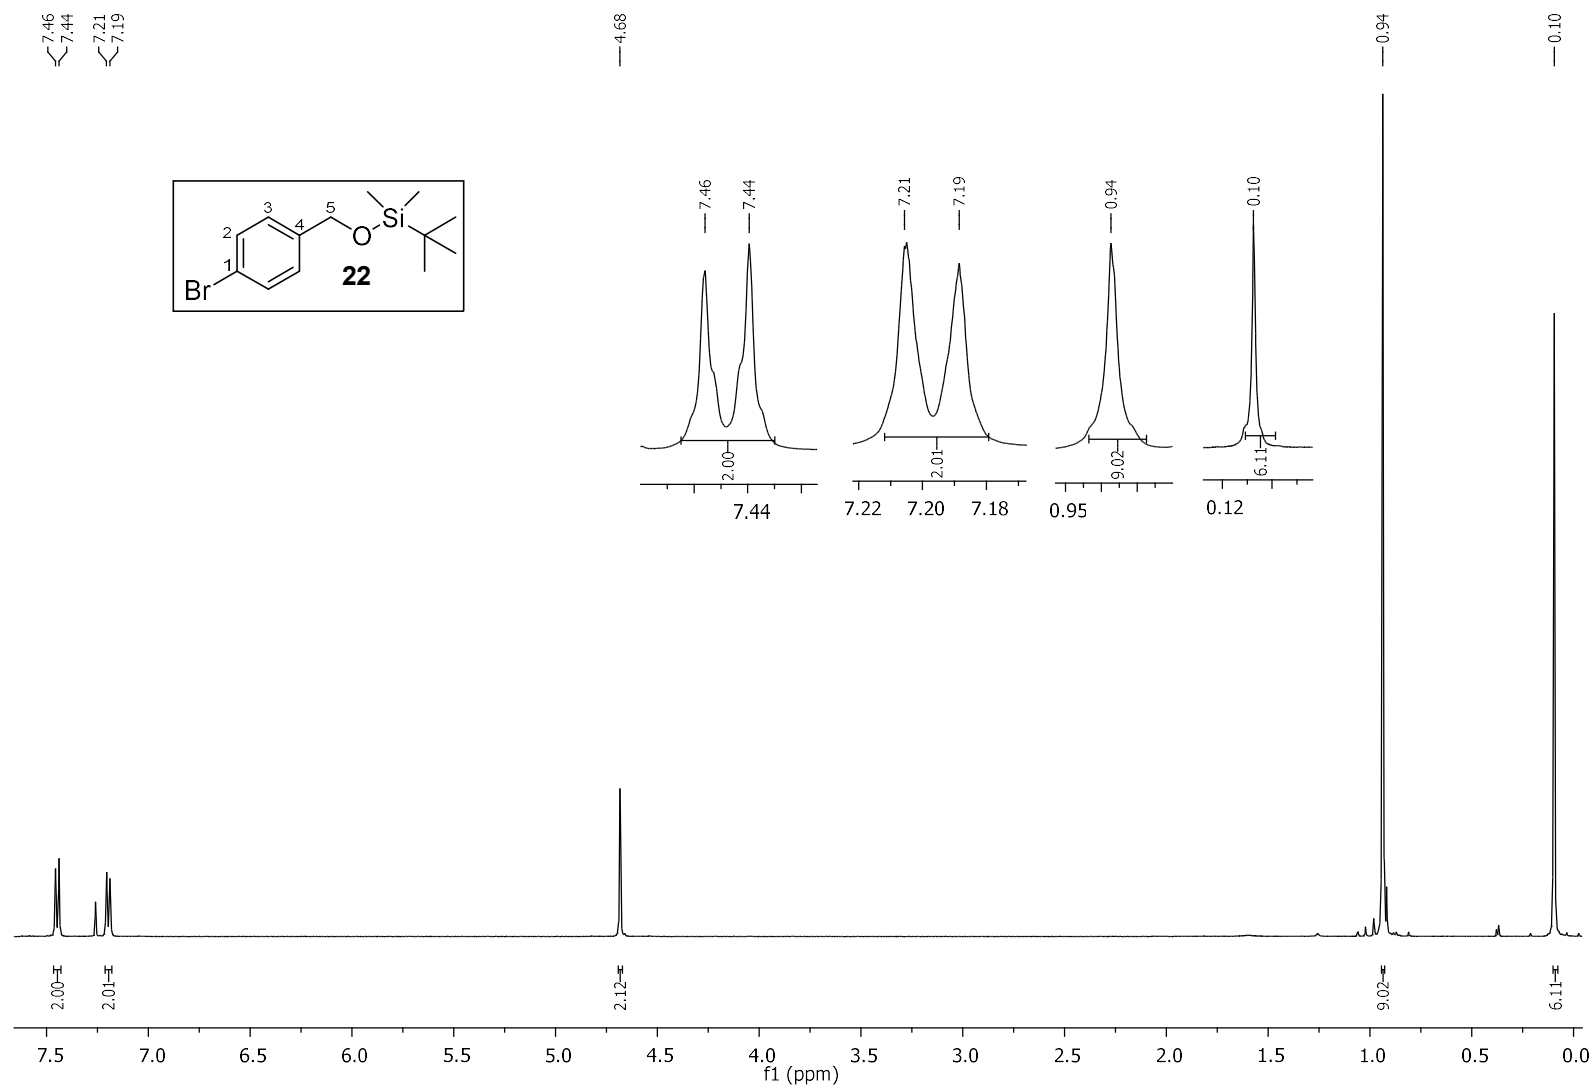

Figure S16: <sup>1</sup>H NMR spectrum of ((4-Bromobenzyl)oxy)(*tert*-butyl)dimethylsilane (**22**).

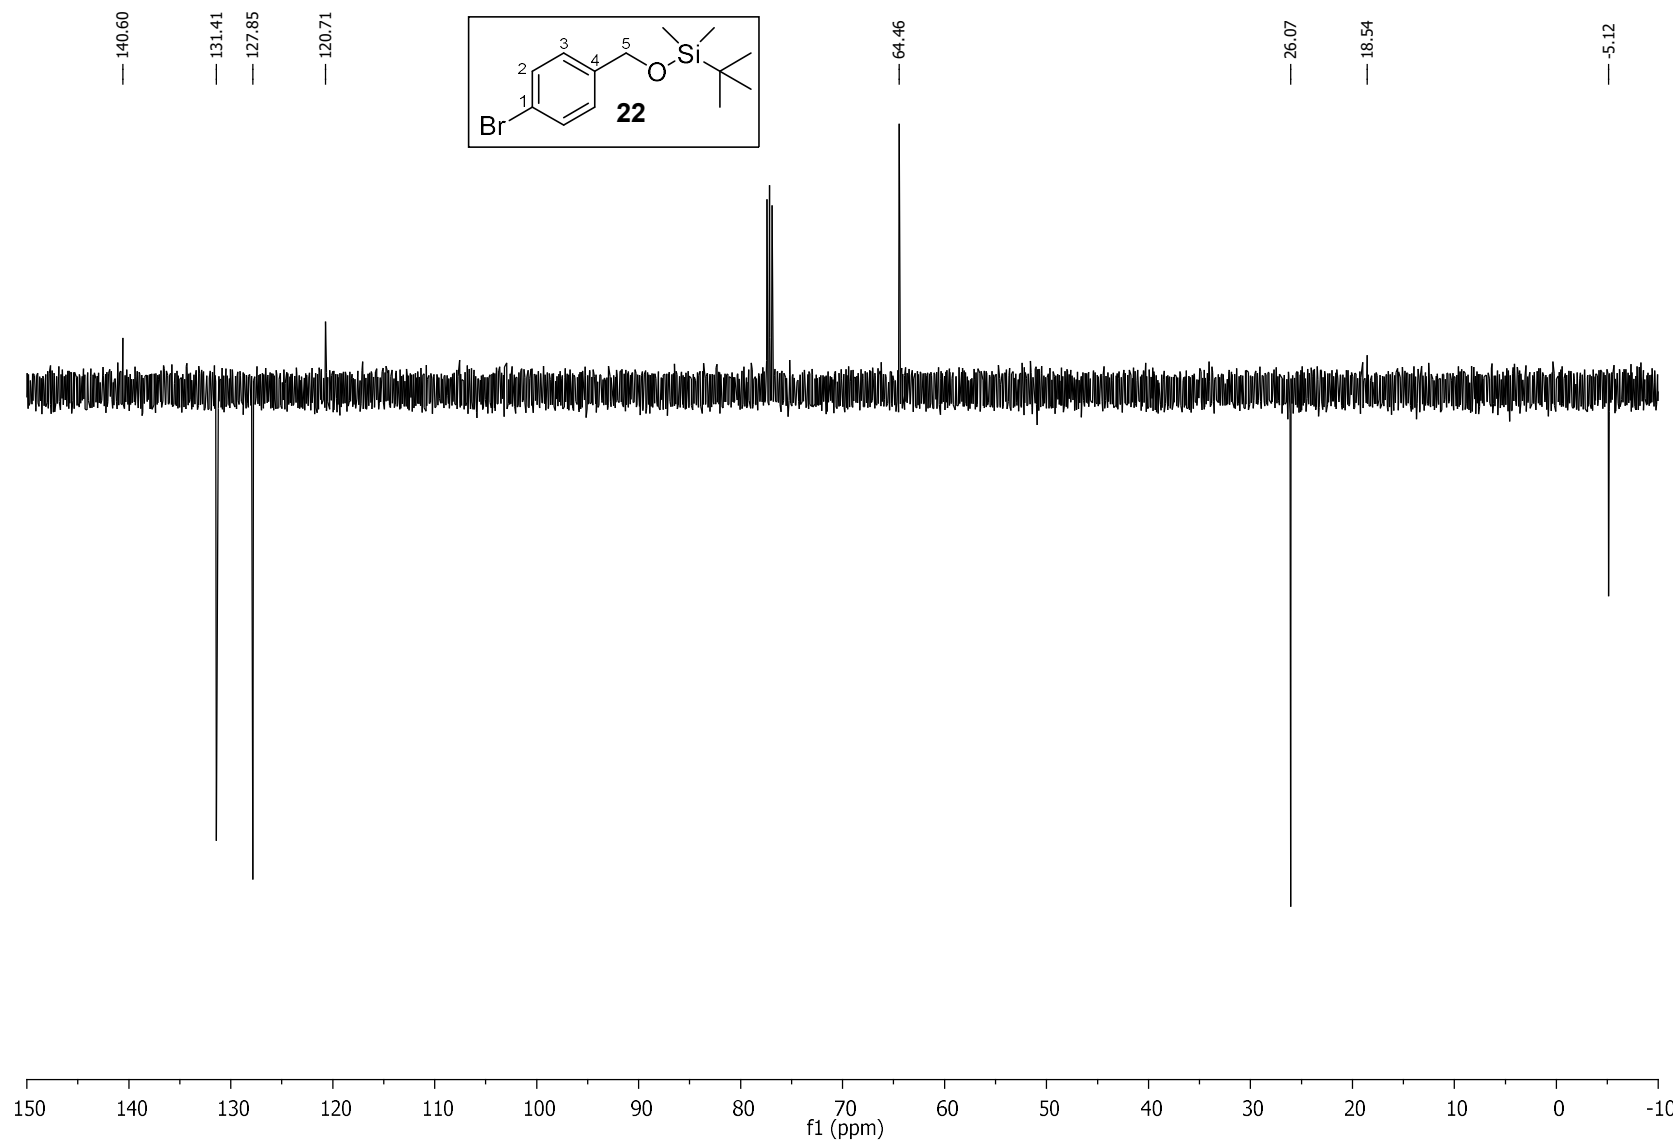

Figure S17.  $^{13}\text{C}$  NMR spectrum of ((4-Bromobenzyl)oxy)(*tert*-butyl)dimethylsilane (**22**).

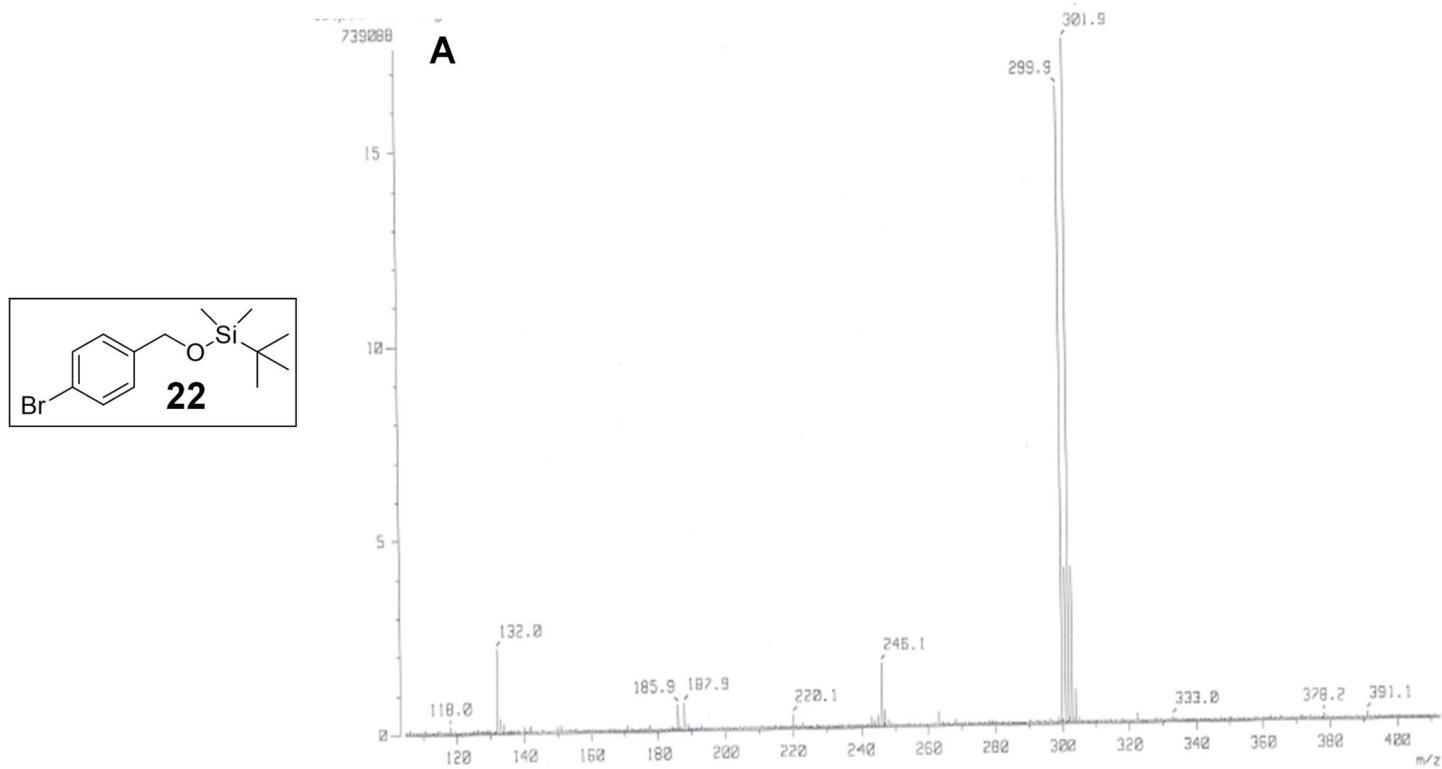

Figure S18. Mass spectrum (**A**: FI) of ((4-Bromobenzyl)oxy)(*tert*-butyl)dimethylsilane (**22**).

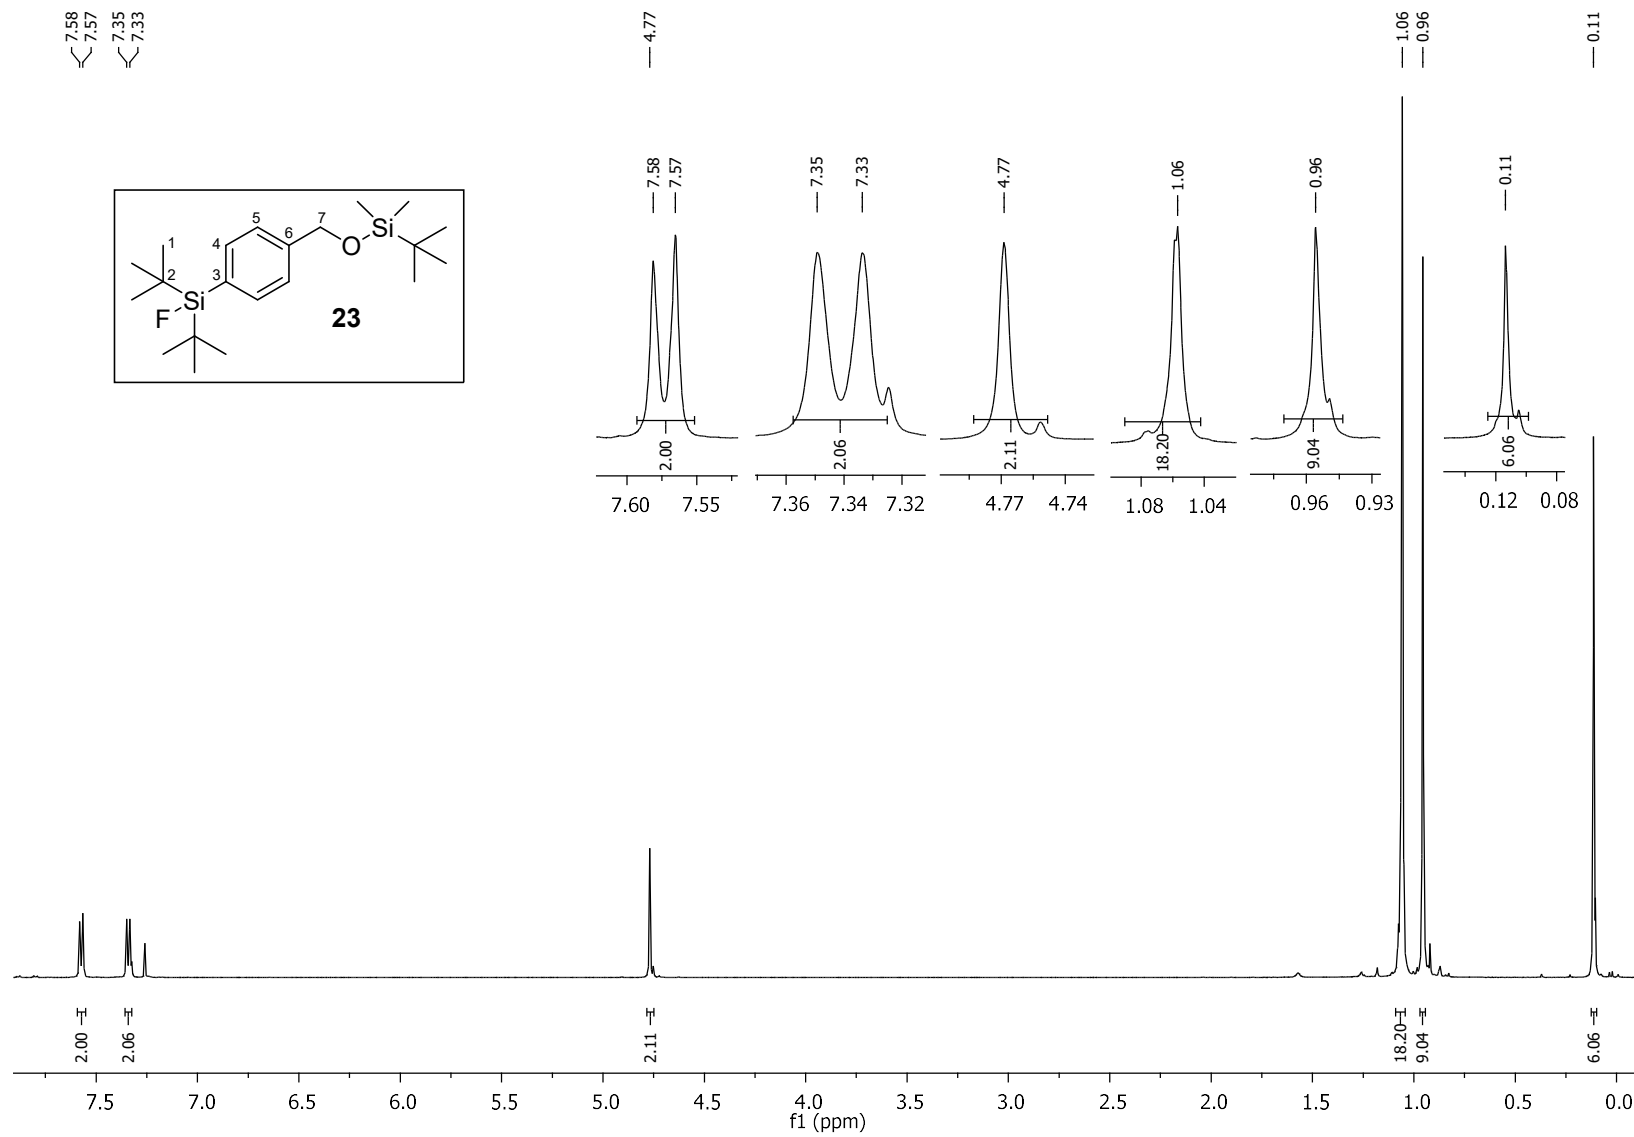

Figure S19.  $^1\text{H}$  NMR spectrum of Di-*tert*-butyl(4-(((*tert*-butyldimethylsilyl)oxy)methyl)phenyl)fluorosilane (**23**).



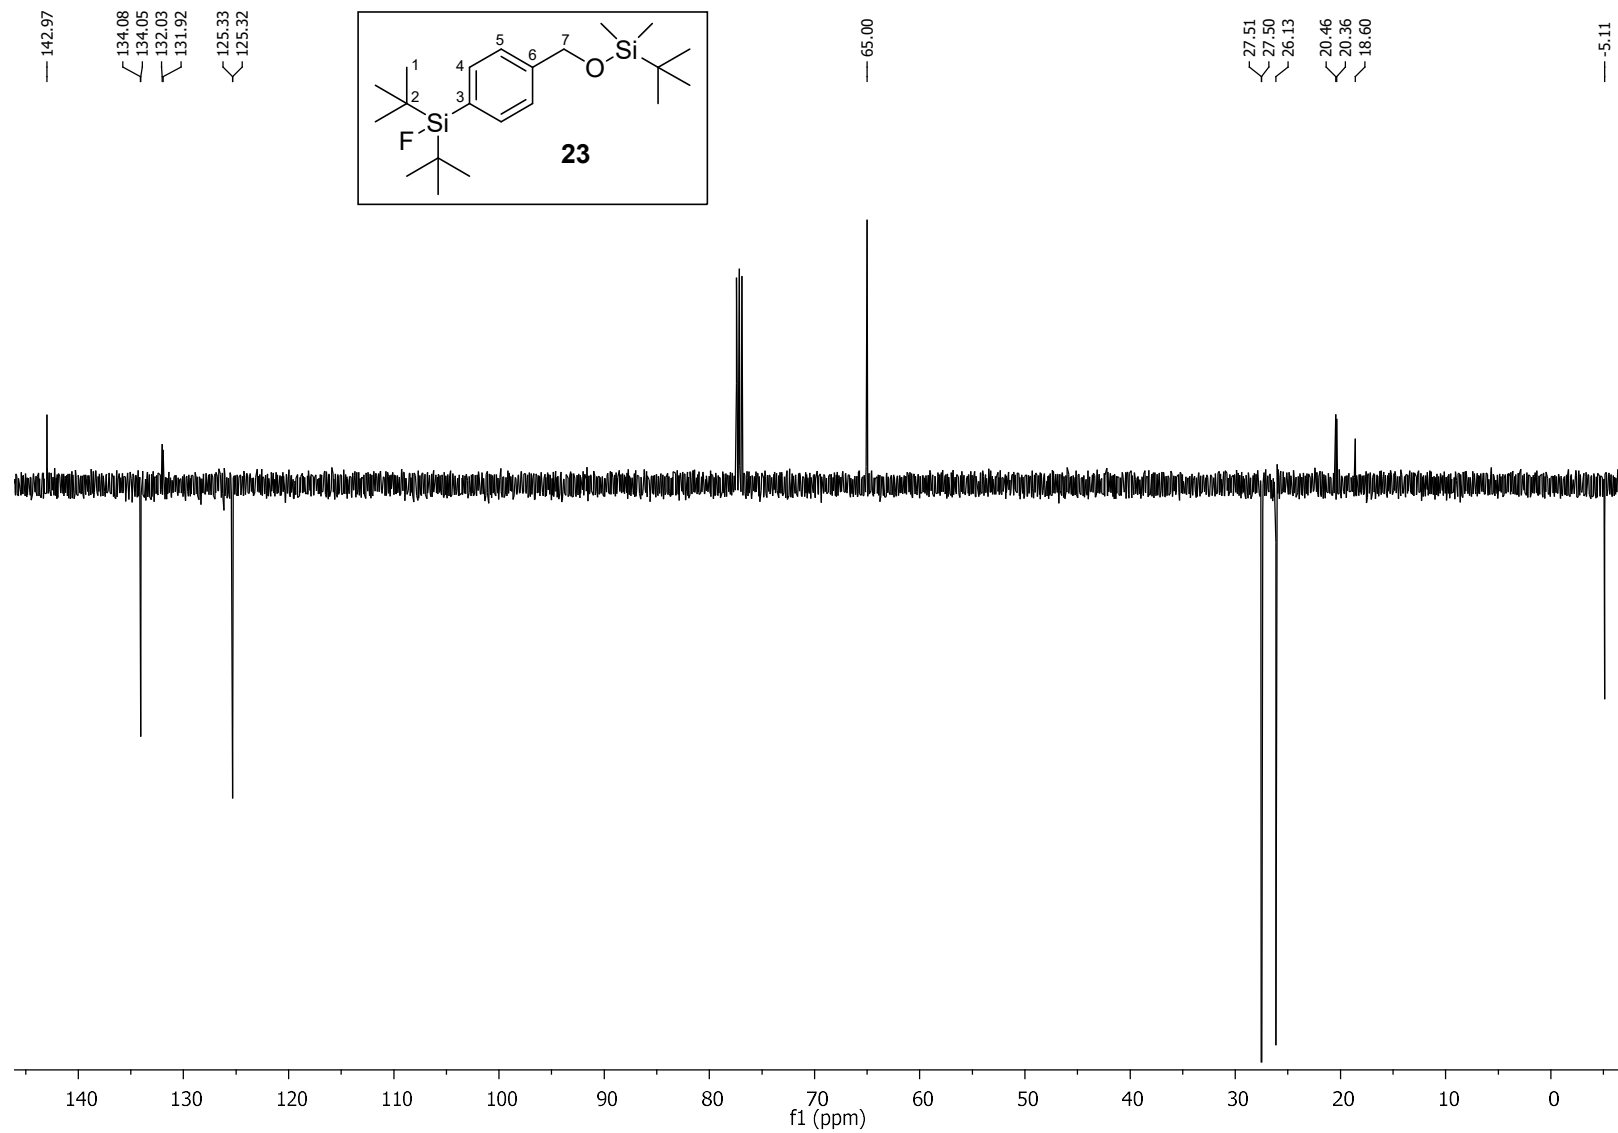

Figure S20. <sup>13</sup>C NMR spectrum of Di-*tert*-butyl(4-(((*tert*-butyldimethylsilyl)oxy)methyl)phenyl)fluorosilane (**23**).

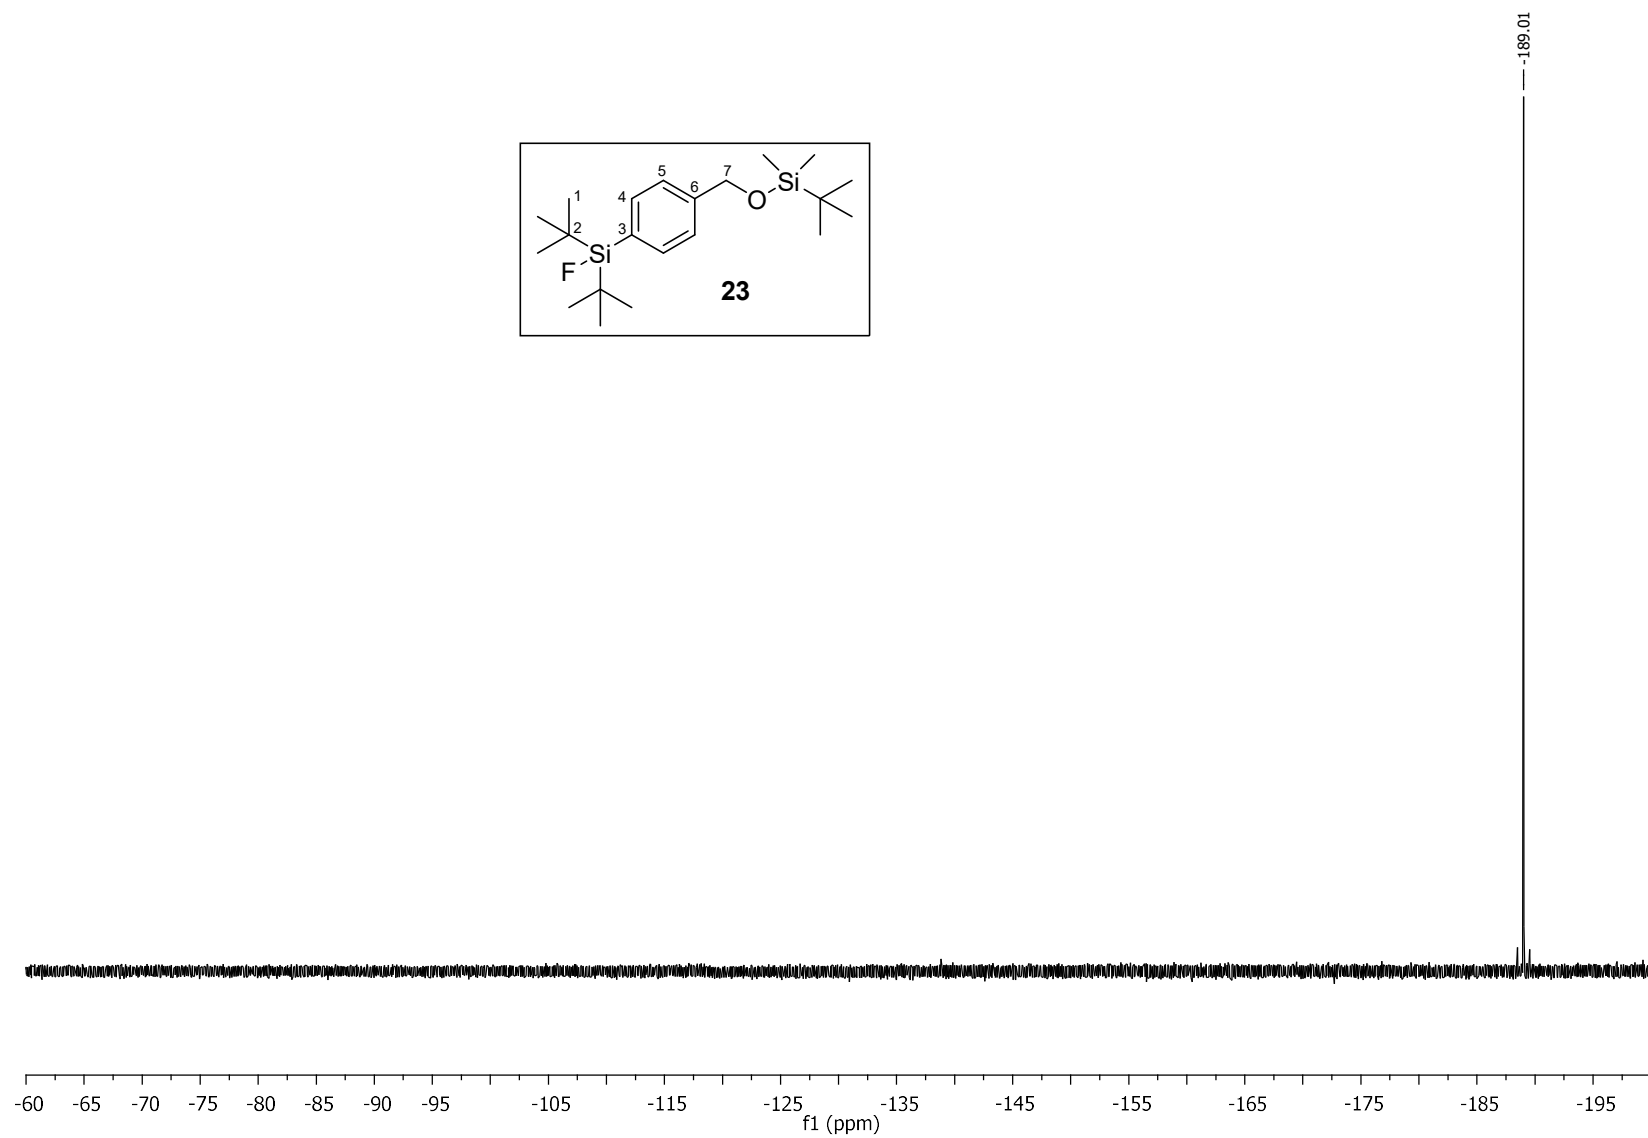

Figure S21.  $^{19}\text{F}$  NMR spectrum of Di-*tert*-butyl(4-(((*tert*-butyldimethylsilyl)oxy)methyl)phenyl)fluorosilane (**23**).

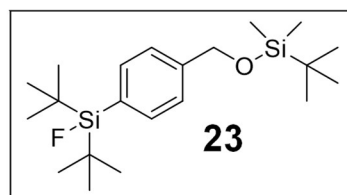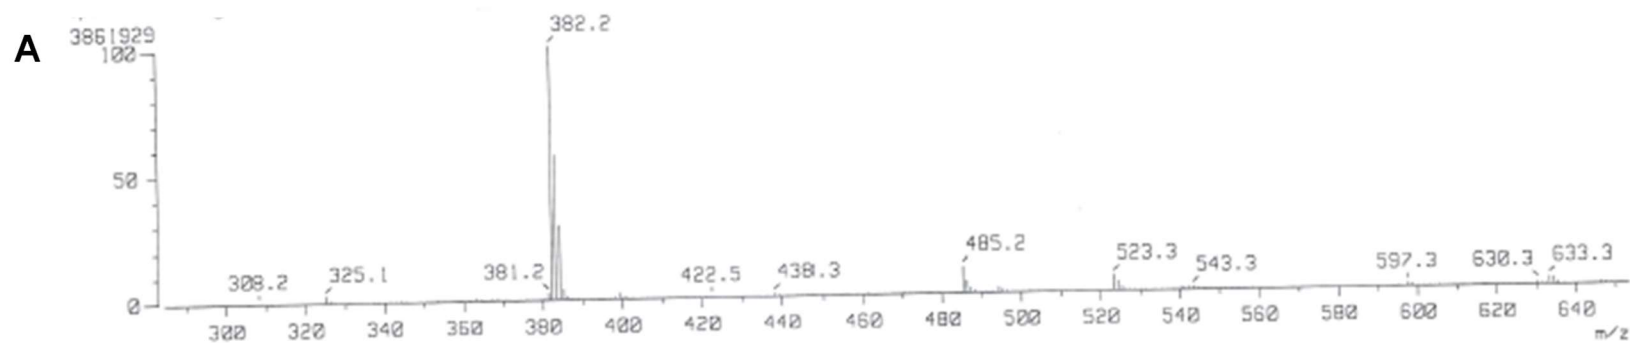

Figure S22. Mass spectrum (**A**: FD) of Di-*tert*-butyl(4-(((*tert*-butyldimethylsilyl)oxy)methyl)phenyl)fluorosilane (**23**).

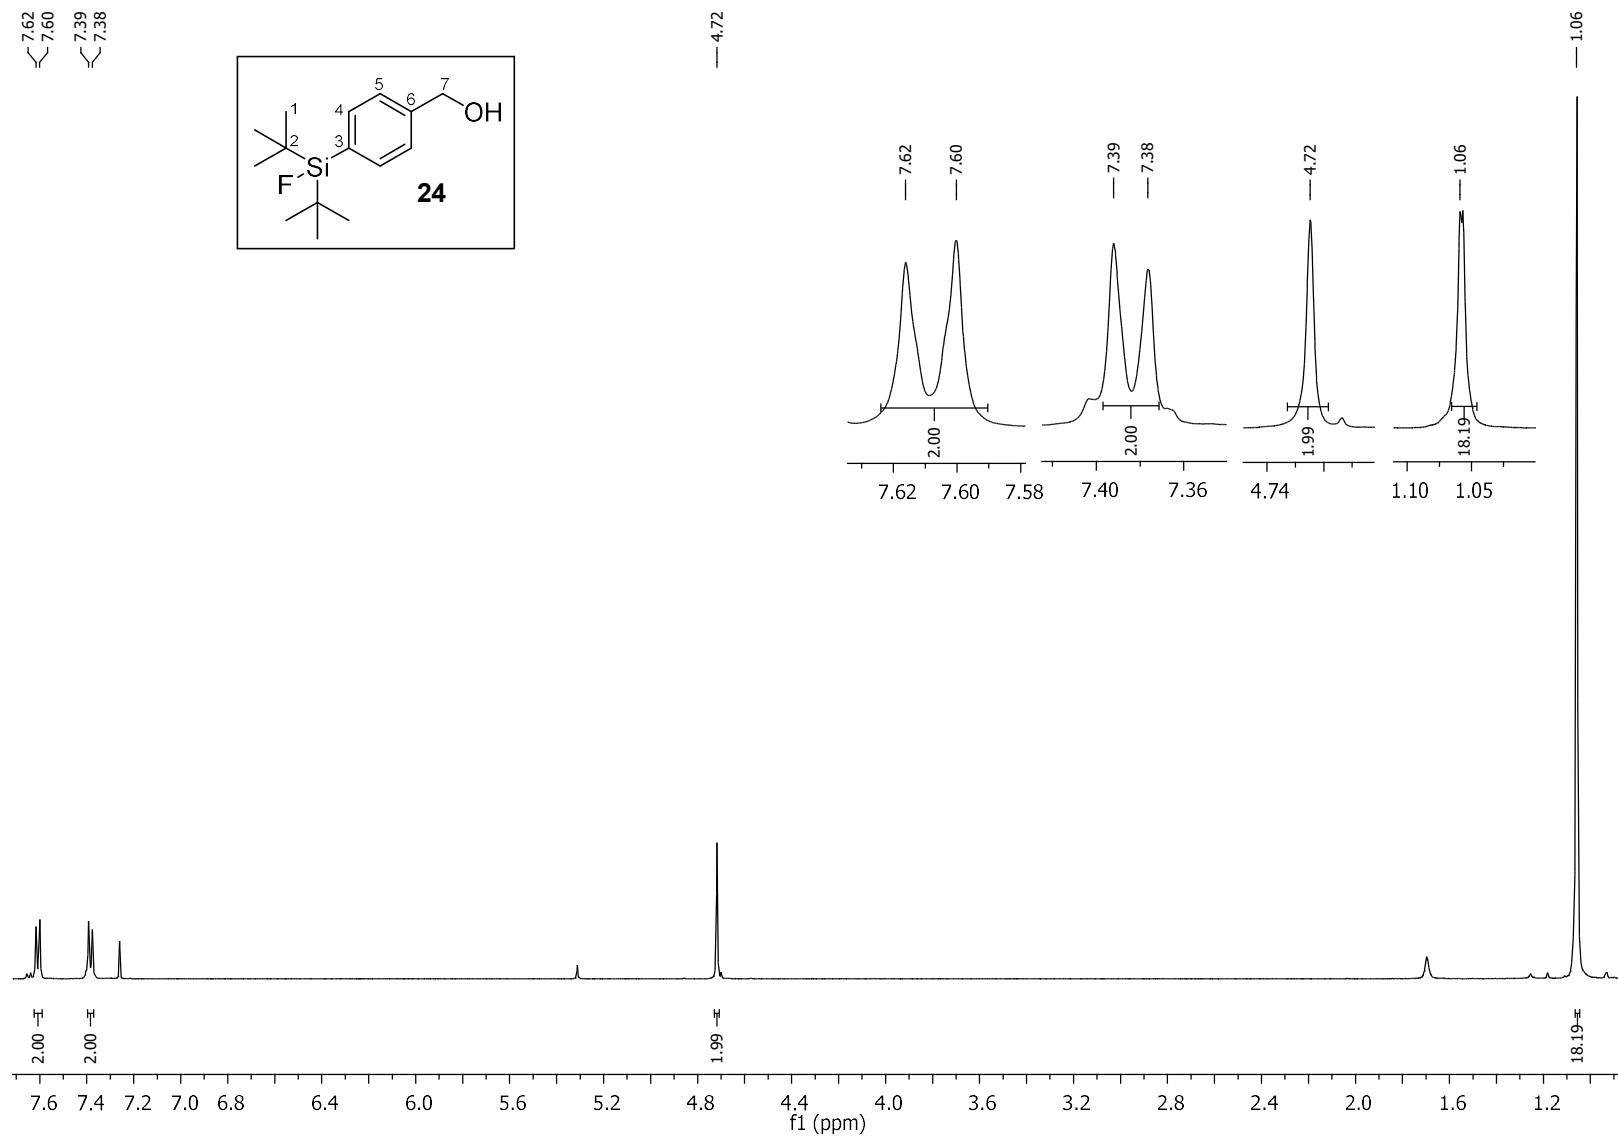

Figure S23.  $^1\text{H}$  NMR spectrum of (4-(Di-*tert*-butylfluorosilyl)phenyl)methanol (**24**).

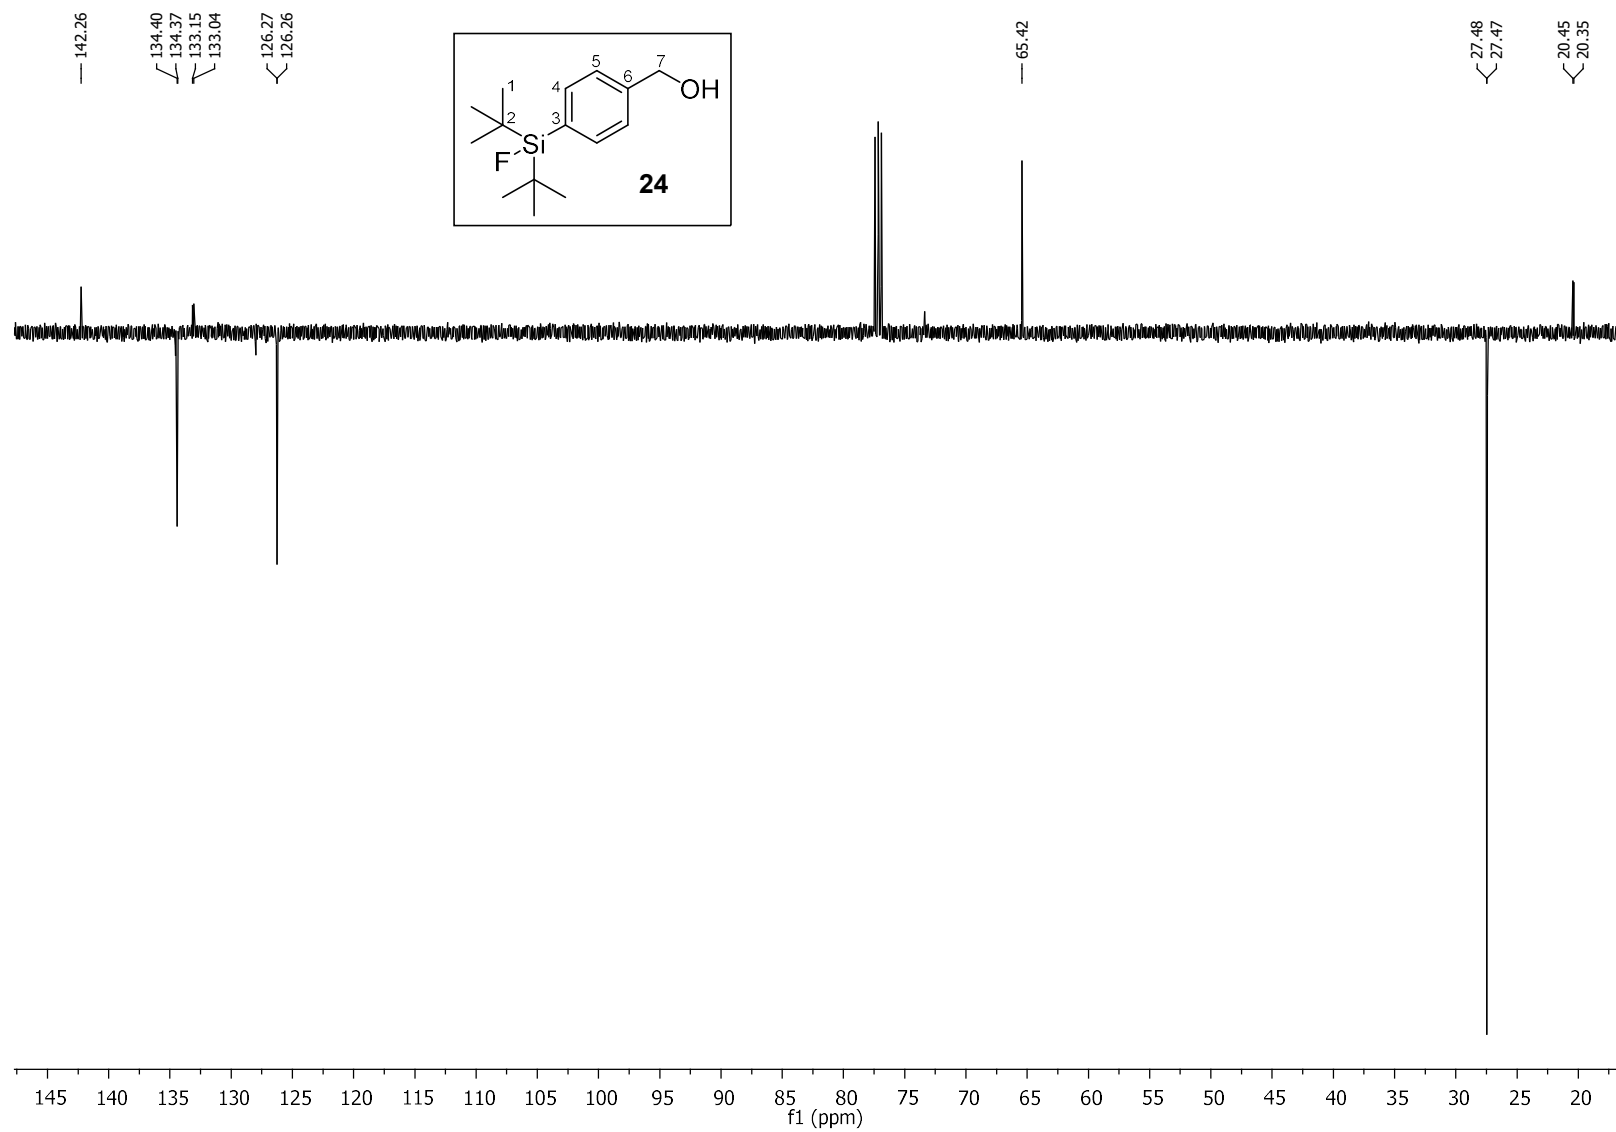

Figure S24.  $^{13}\text{C}$  NMR spectrum of (4-(Di-*tert*-butylfluorosilyl)phenyl)methanol (**24**).

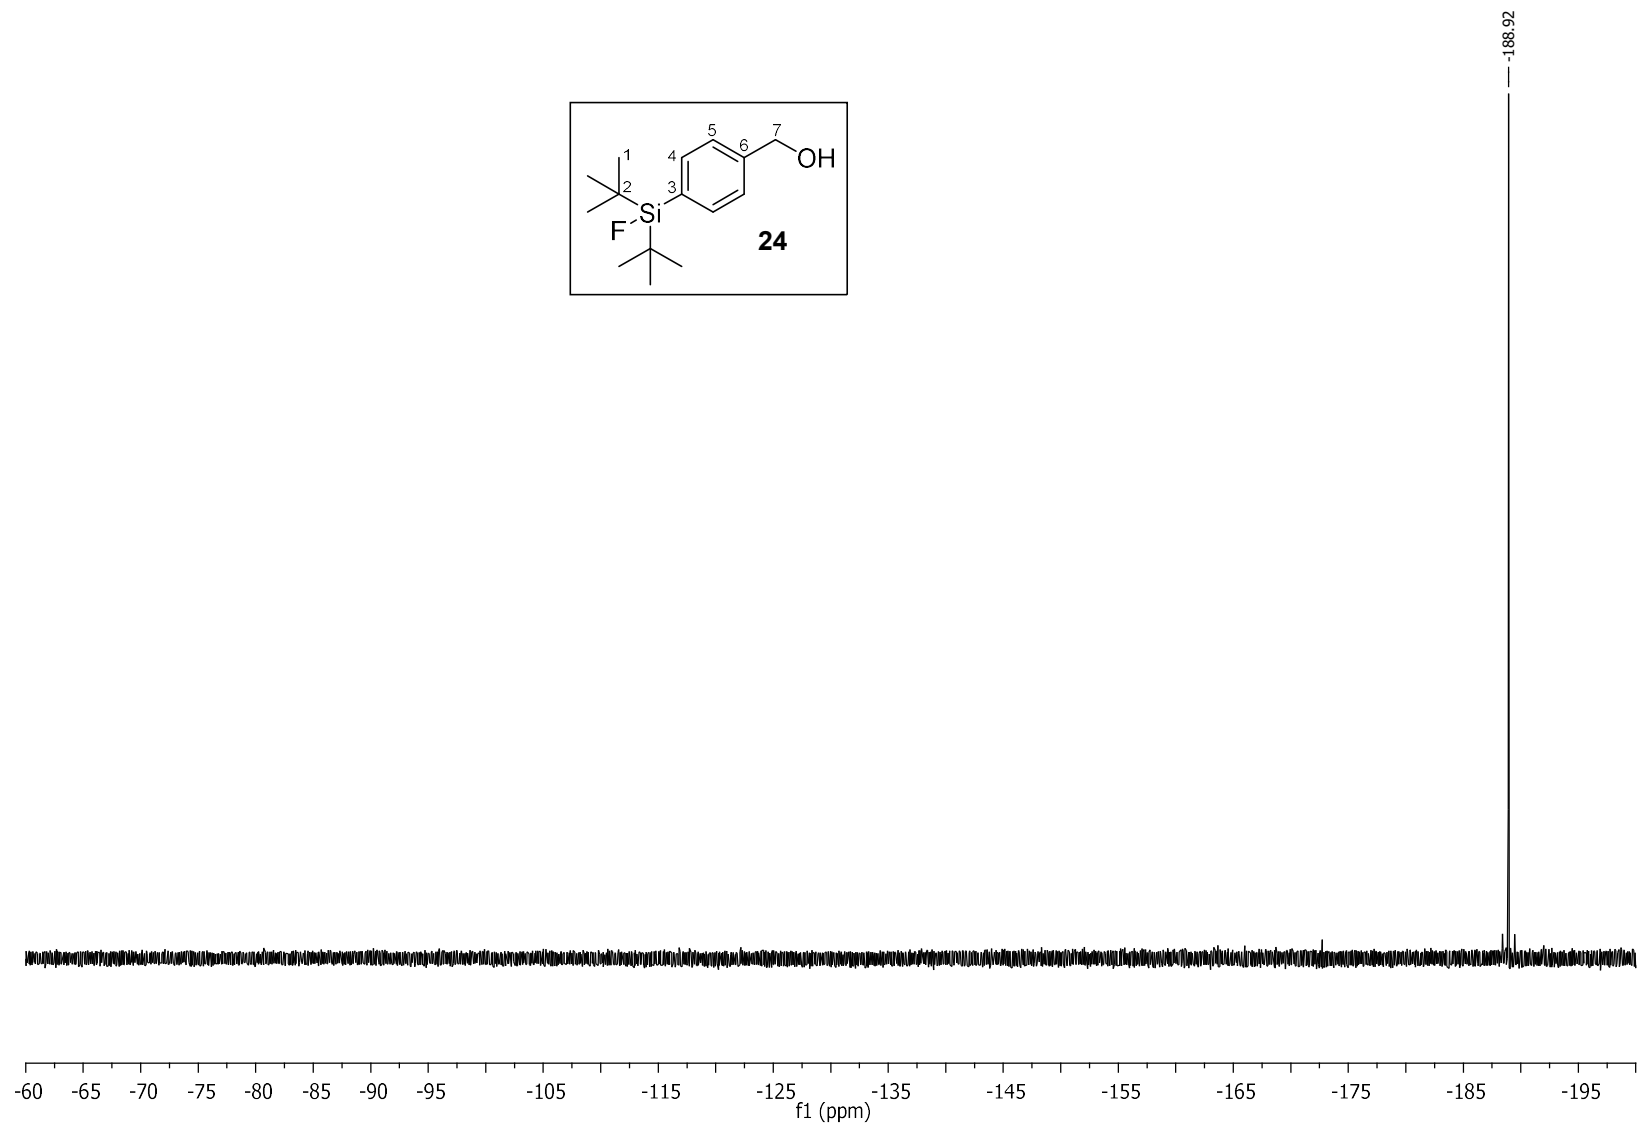

Figure S25.  $^{19}\text{F}$  NMR spectrum of (4-(Di-*tert*-butylfluorosilyl)phenyl)methanol (**24**).

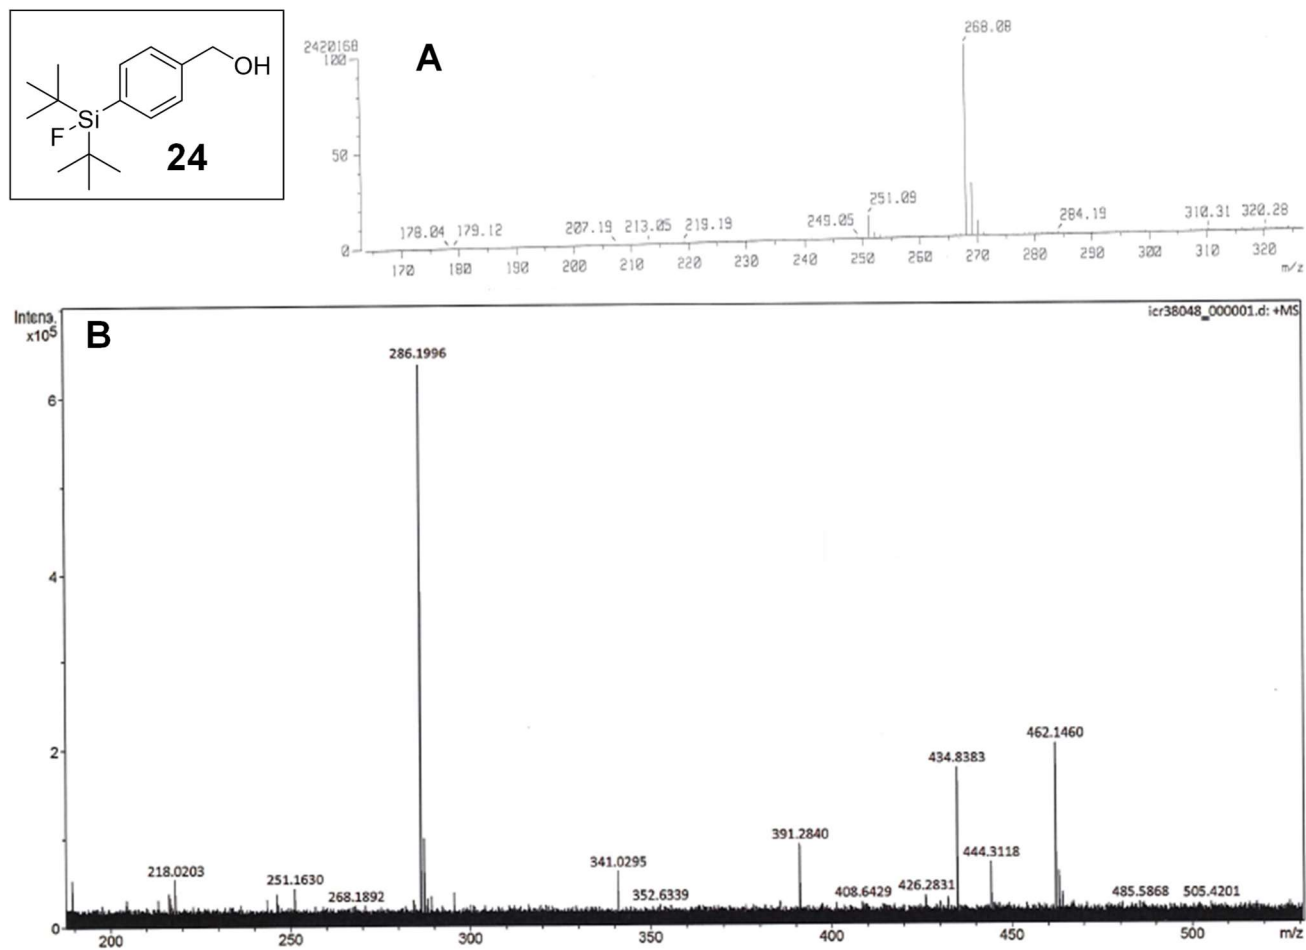

Figure S26. Mass spectra (**A**: FD, **B**: DART) of 4-(Di-*tert*-butylfluorosilyl)phenyl)methanol (**24**).

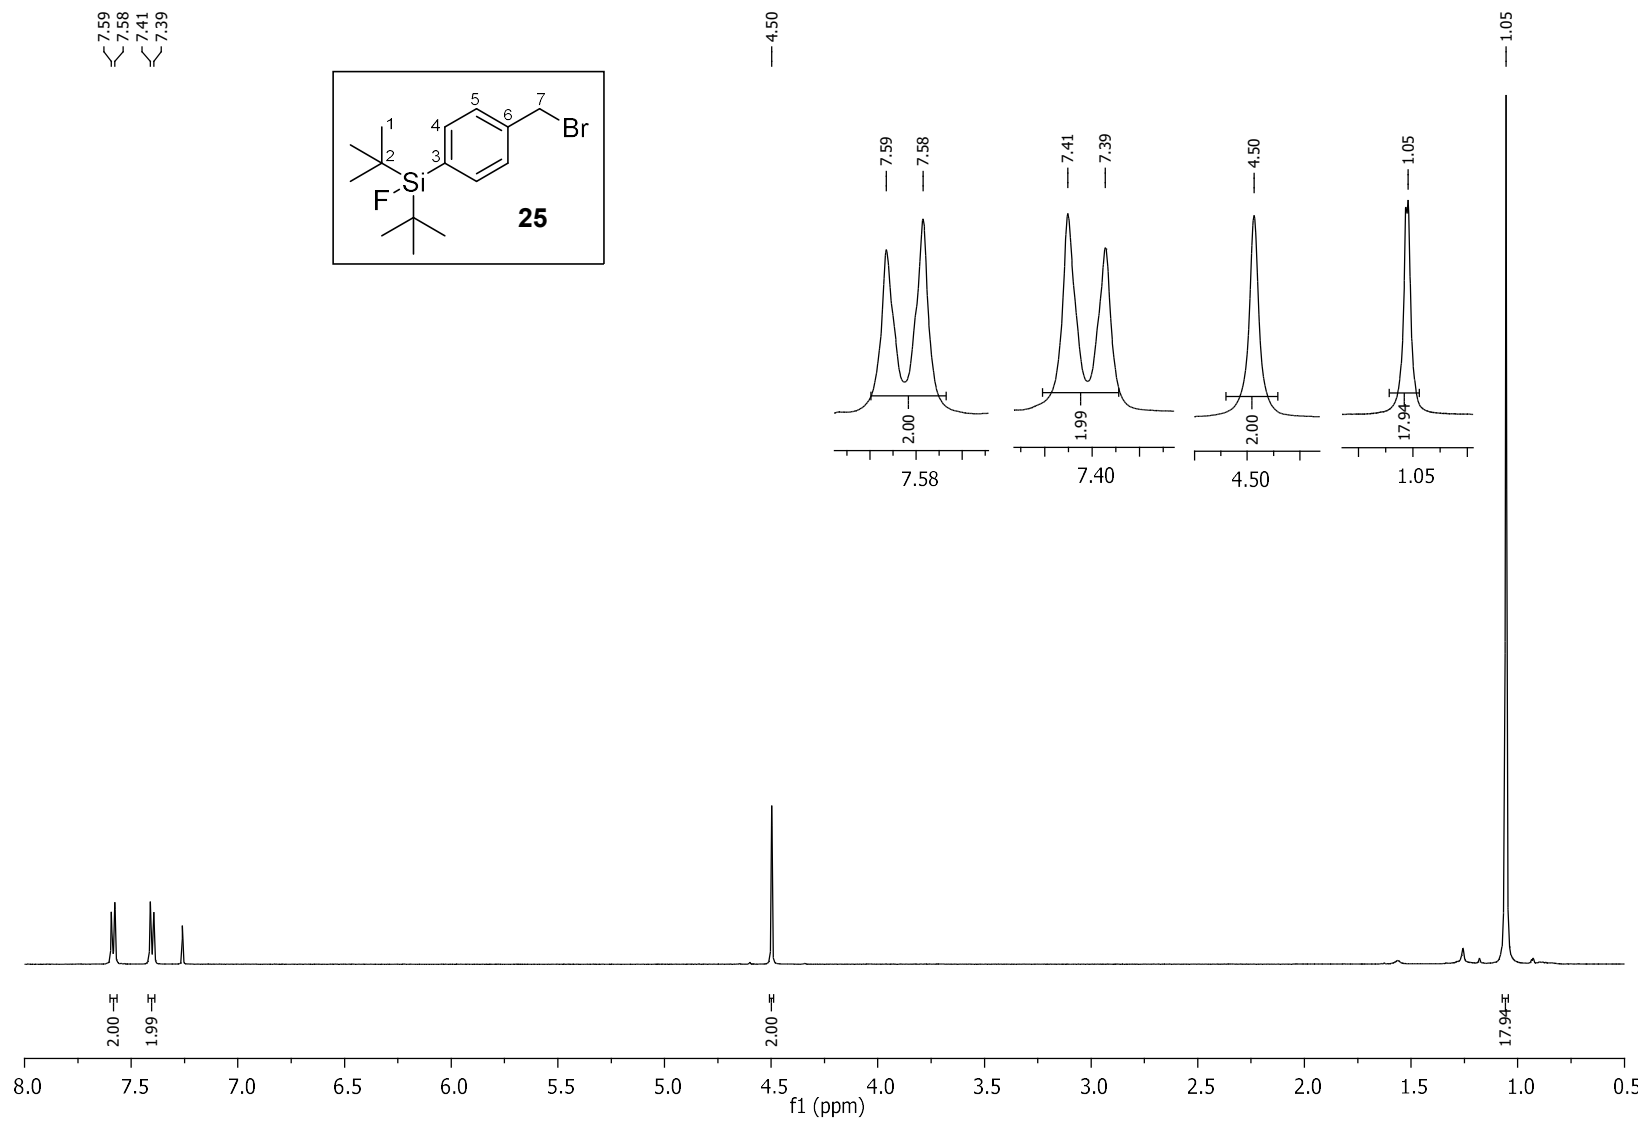

Figure S27.  $^1\text{H}$  NMR spectrum of (4-(Bromomethyl)phenyl)di-*tert*-butylfluorosilane (**25**).



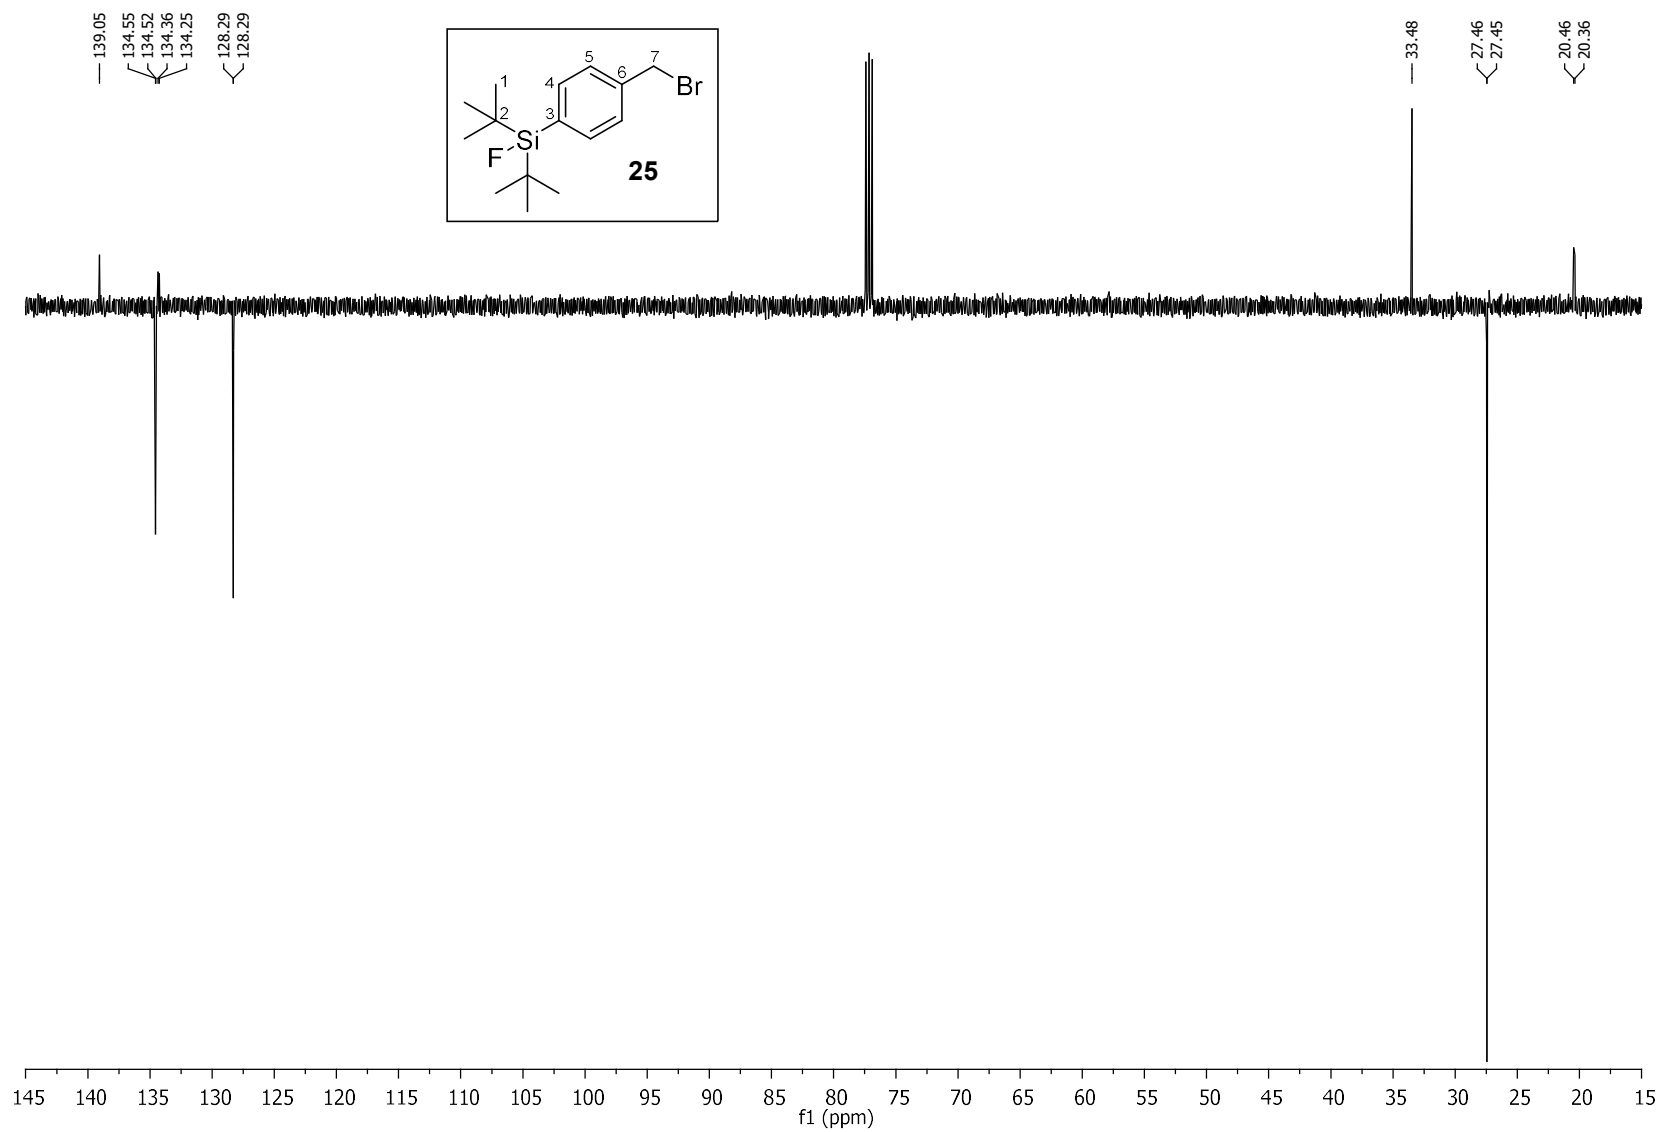

Figure S28.  $^{13}\text{C}$  NMR spectrum of (4-(Bromomethyl)phenyl)di-*tert*-butylfluorosilane (**25**).

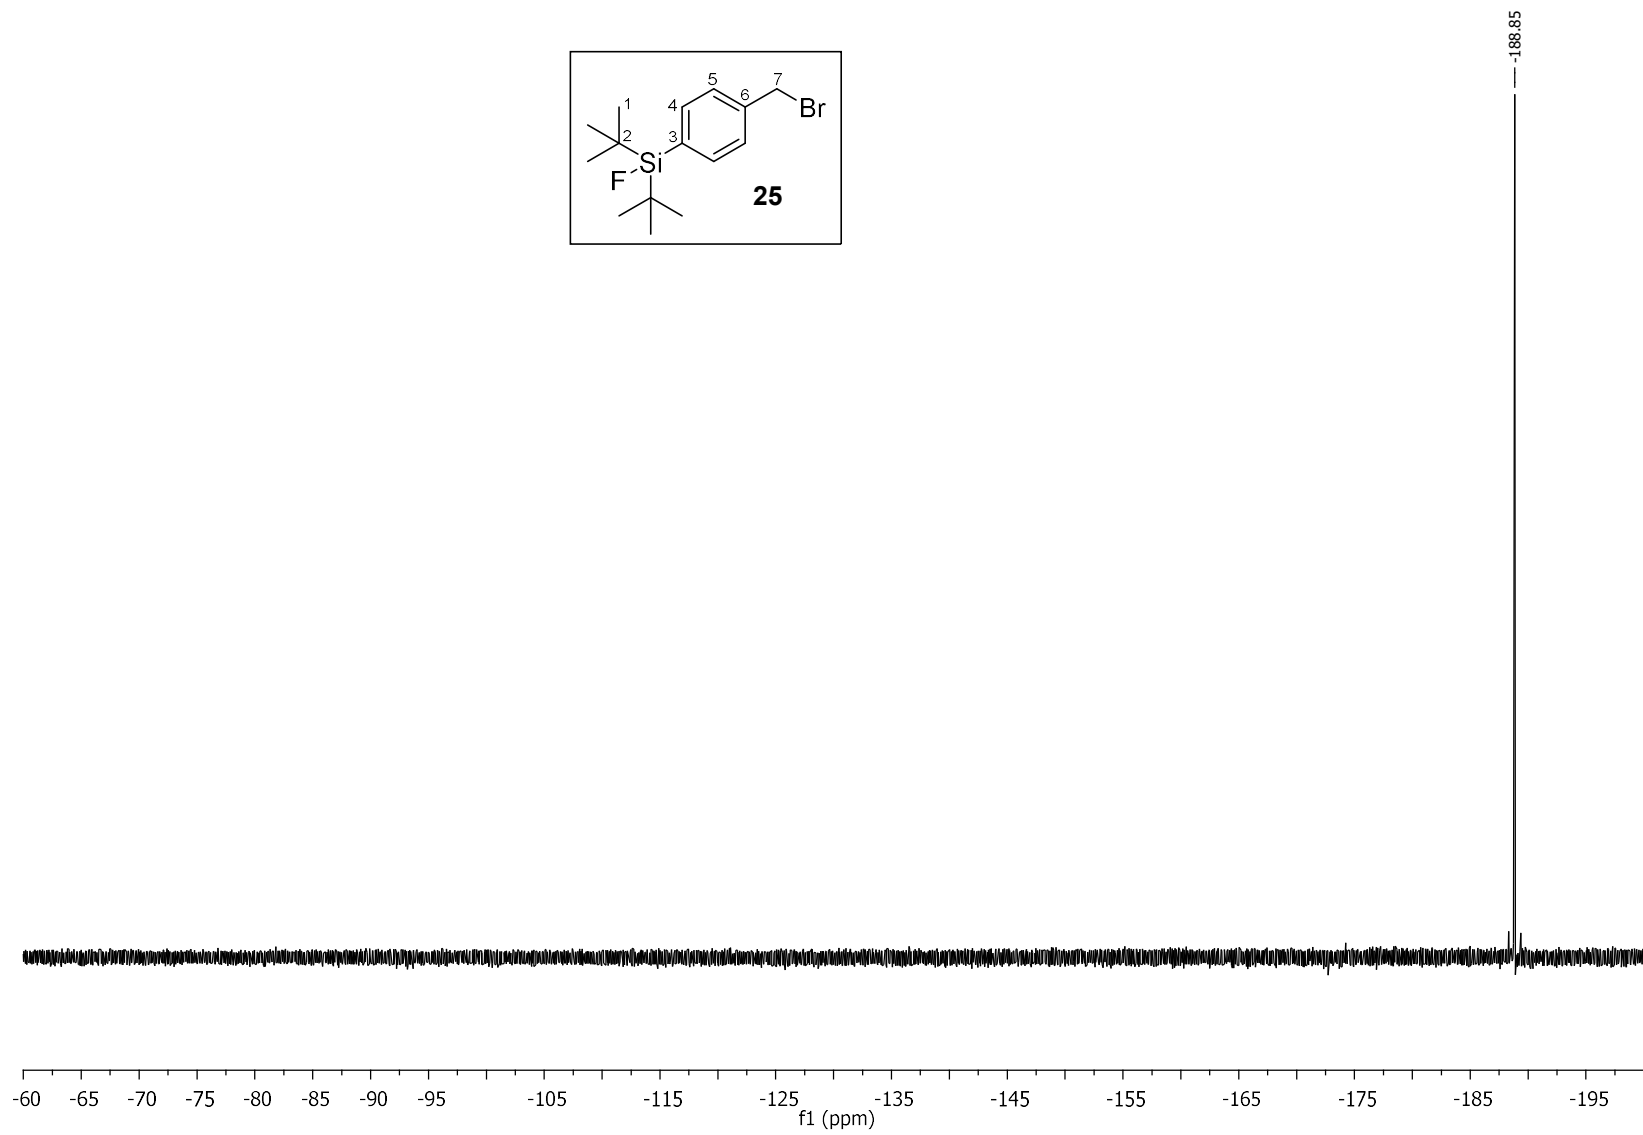

Figure S29.  $^{19}\text{F}$  NMR spectrum of (4-(Bromomethyl)phenyl)di-*tert*-butylfluorosilane (**25**).

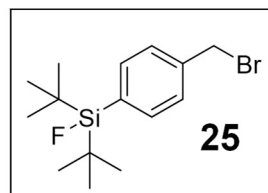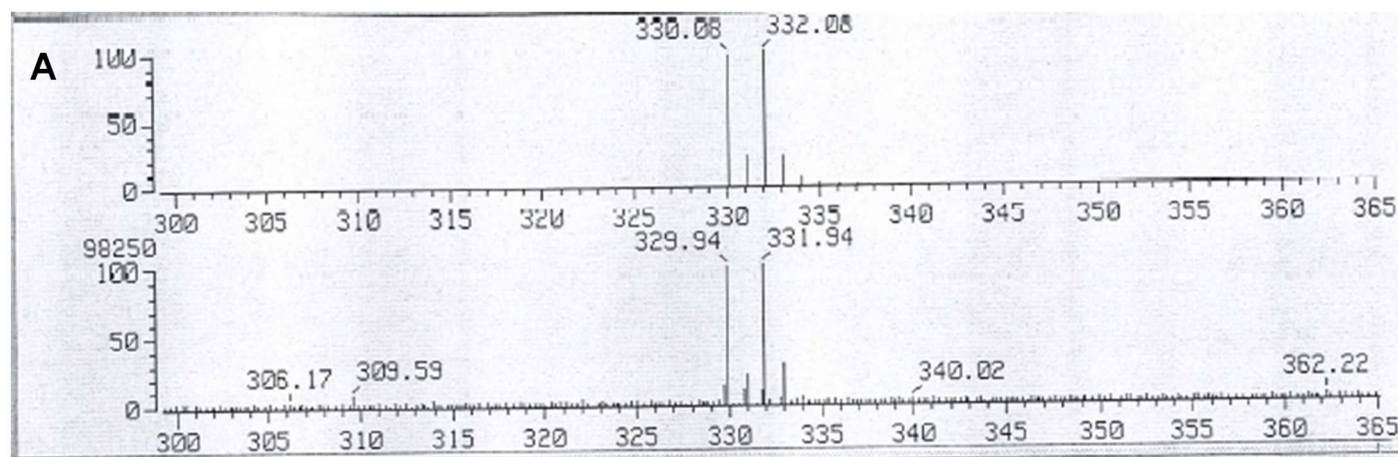

Figure S30. Mass spectrum (**A**: FD) of (4-(Bromomethyl)phenyl)di-*tert*-butylfluorosilane (**25**).

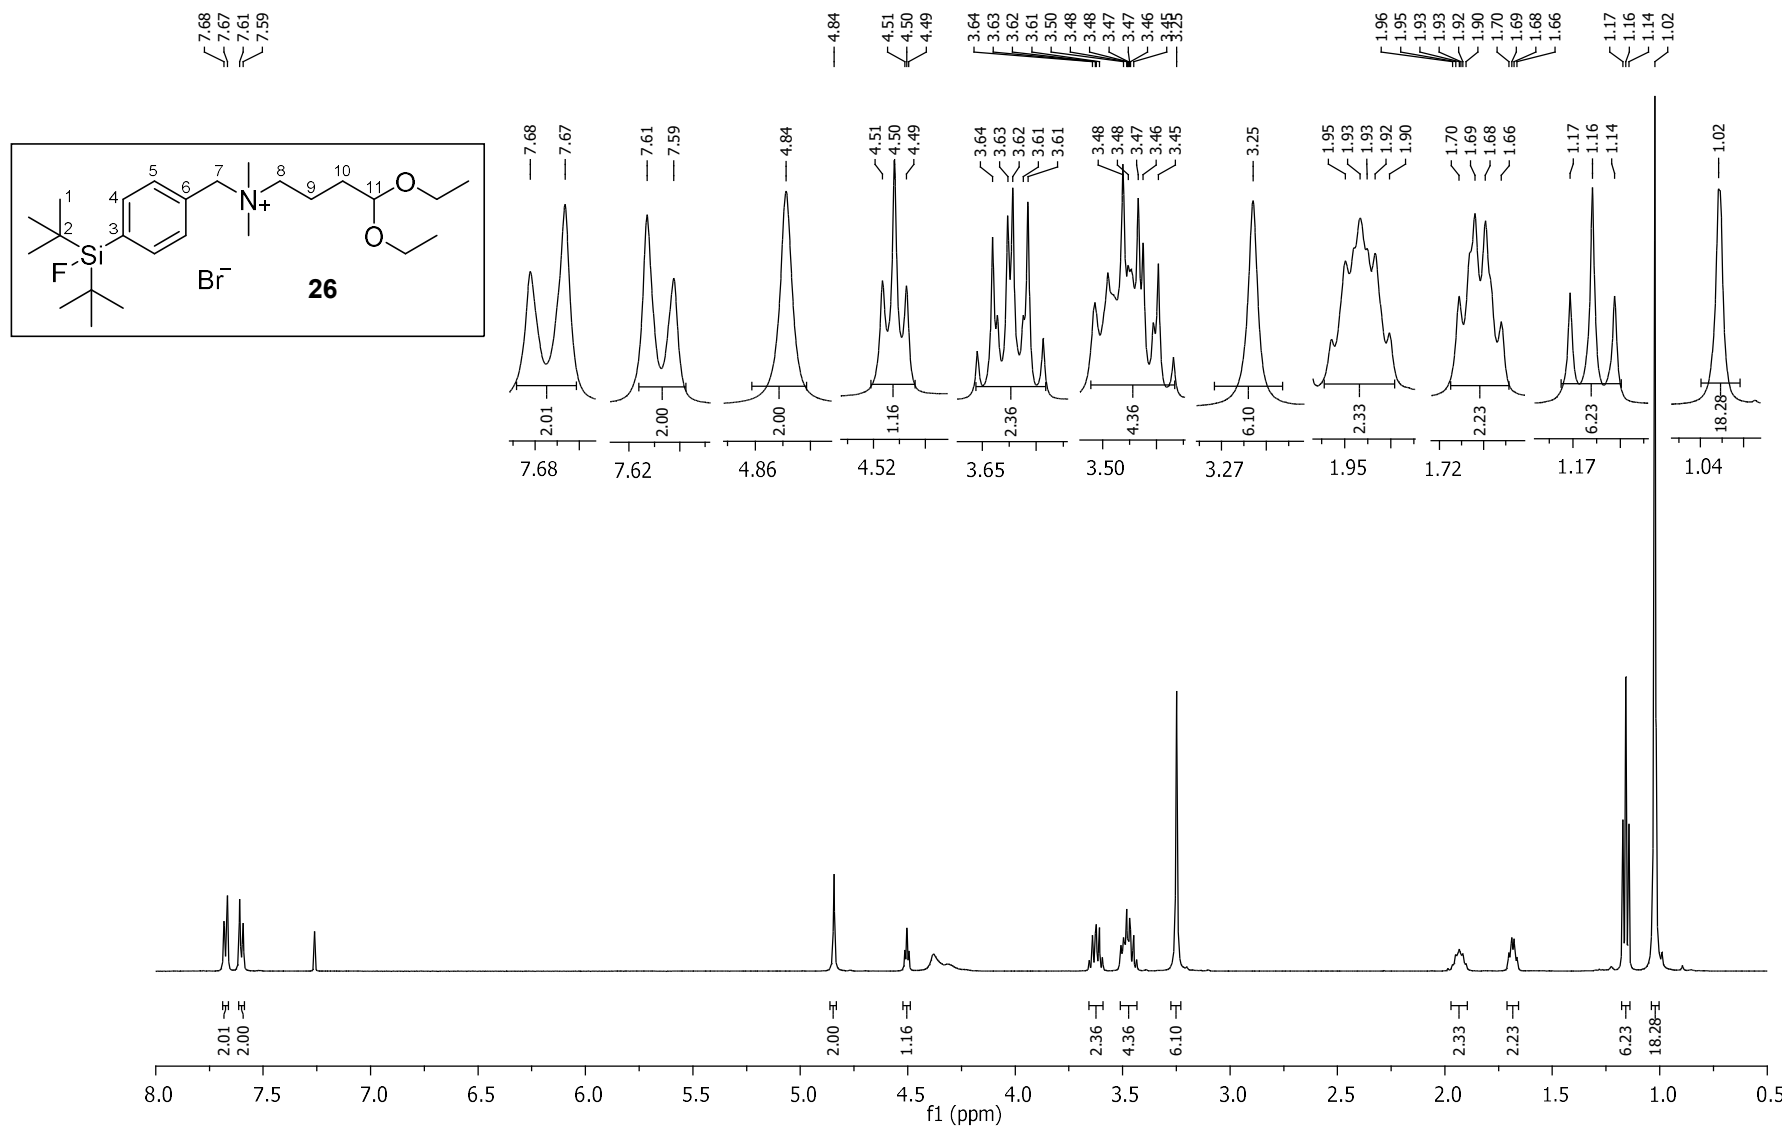

Figure S31. <sup>1</sup>H NMR spectrum of *N*-(4-(Di-*tert*-butylfluorosilyl)benzyl)-4,4-diethoxy-*N,N*-dimethylbutan-1-aminium bromide (**26**).

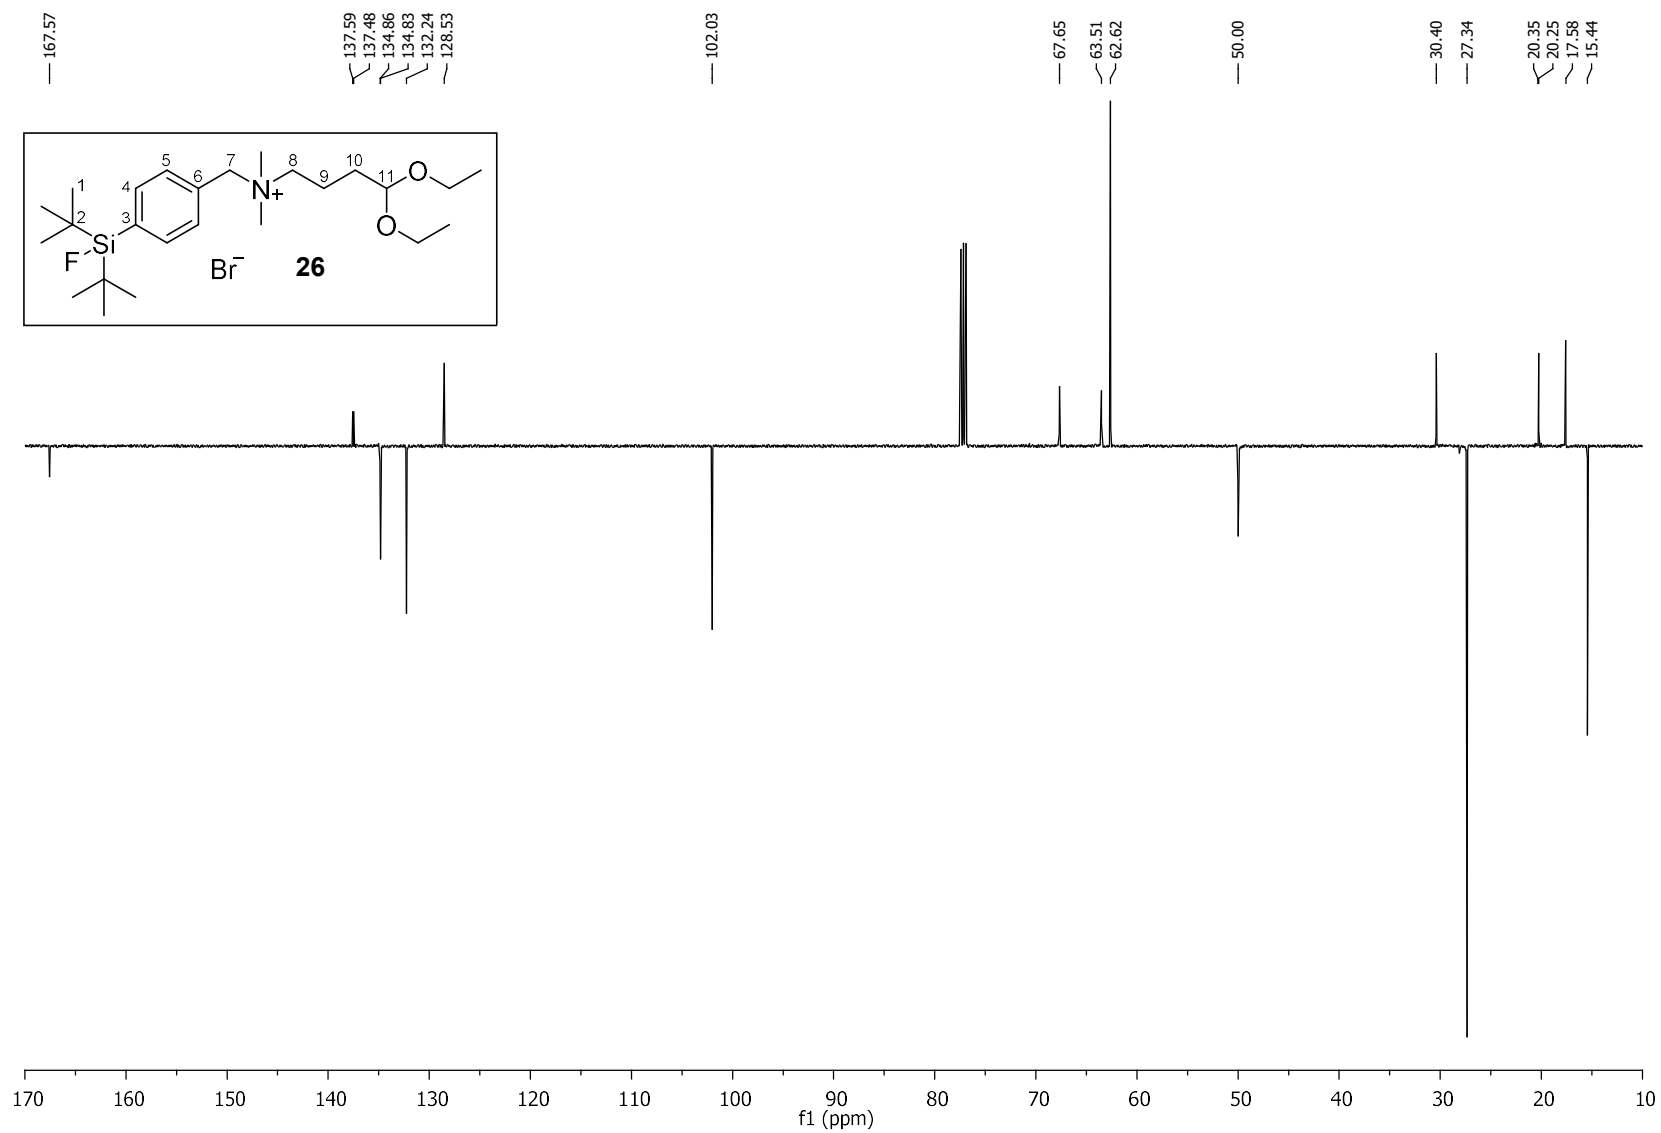

Figure S32.  $^{13}\text{C}$  NMR spectrum of *N*-(4-(Di-*tert*-butylfluorosilyl)benzyl)-4,4-diethoxy-*N,N*-dimethylbutan-1-aminium bromide (**26**).

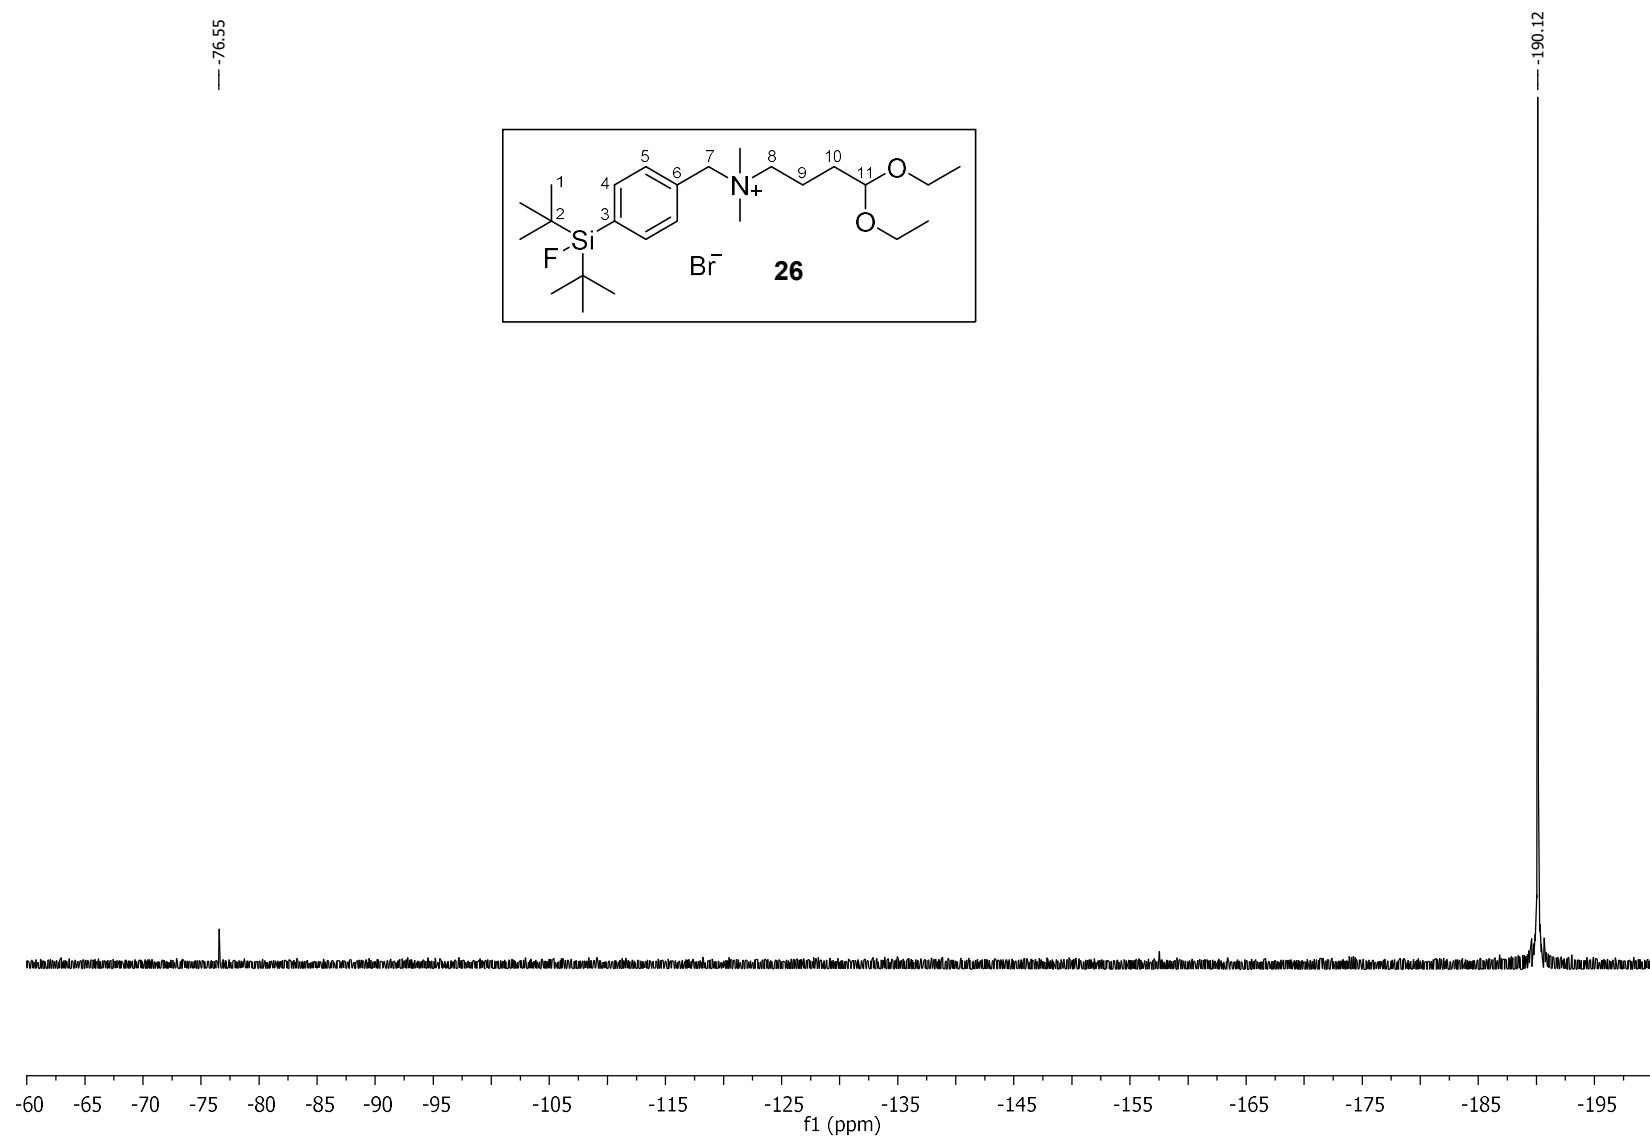

Figure S33.  $^{19}\text{F}$  NMR spectrum of *N*-(4-(Di-*tert*-butylfluorosilyl)benzyl)-4,4-diethoxy-*N,N*-dimethylbutan-1-aminium bromide (**26**).

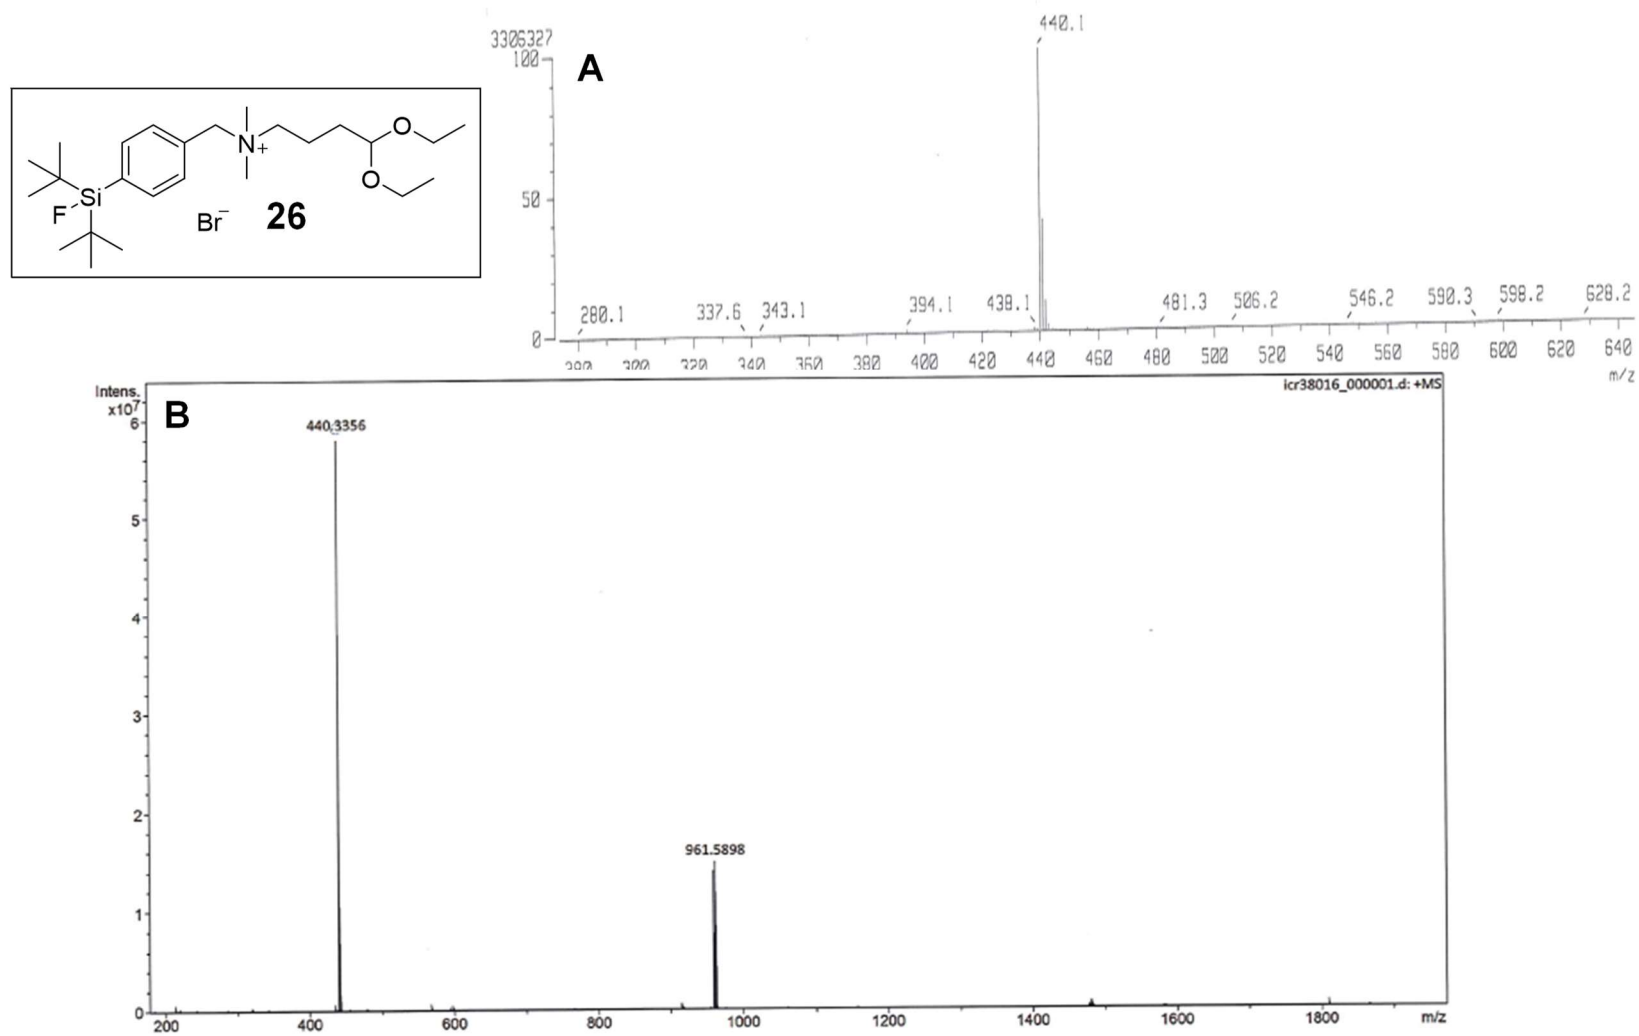

Figure S34. Mass spectra (**A**: FD, **B** ESI) of *N*-(4-(Di-*tert*-butylfluorosilyl)benzyl)-4,4-diethoxy-*N,N*-dimethylbutan-1-aminium bromide (**26**).

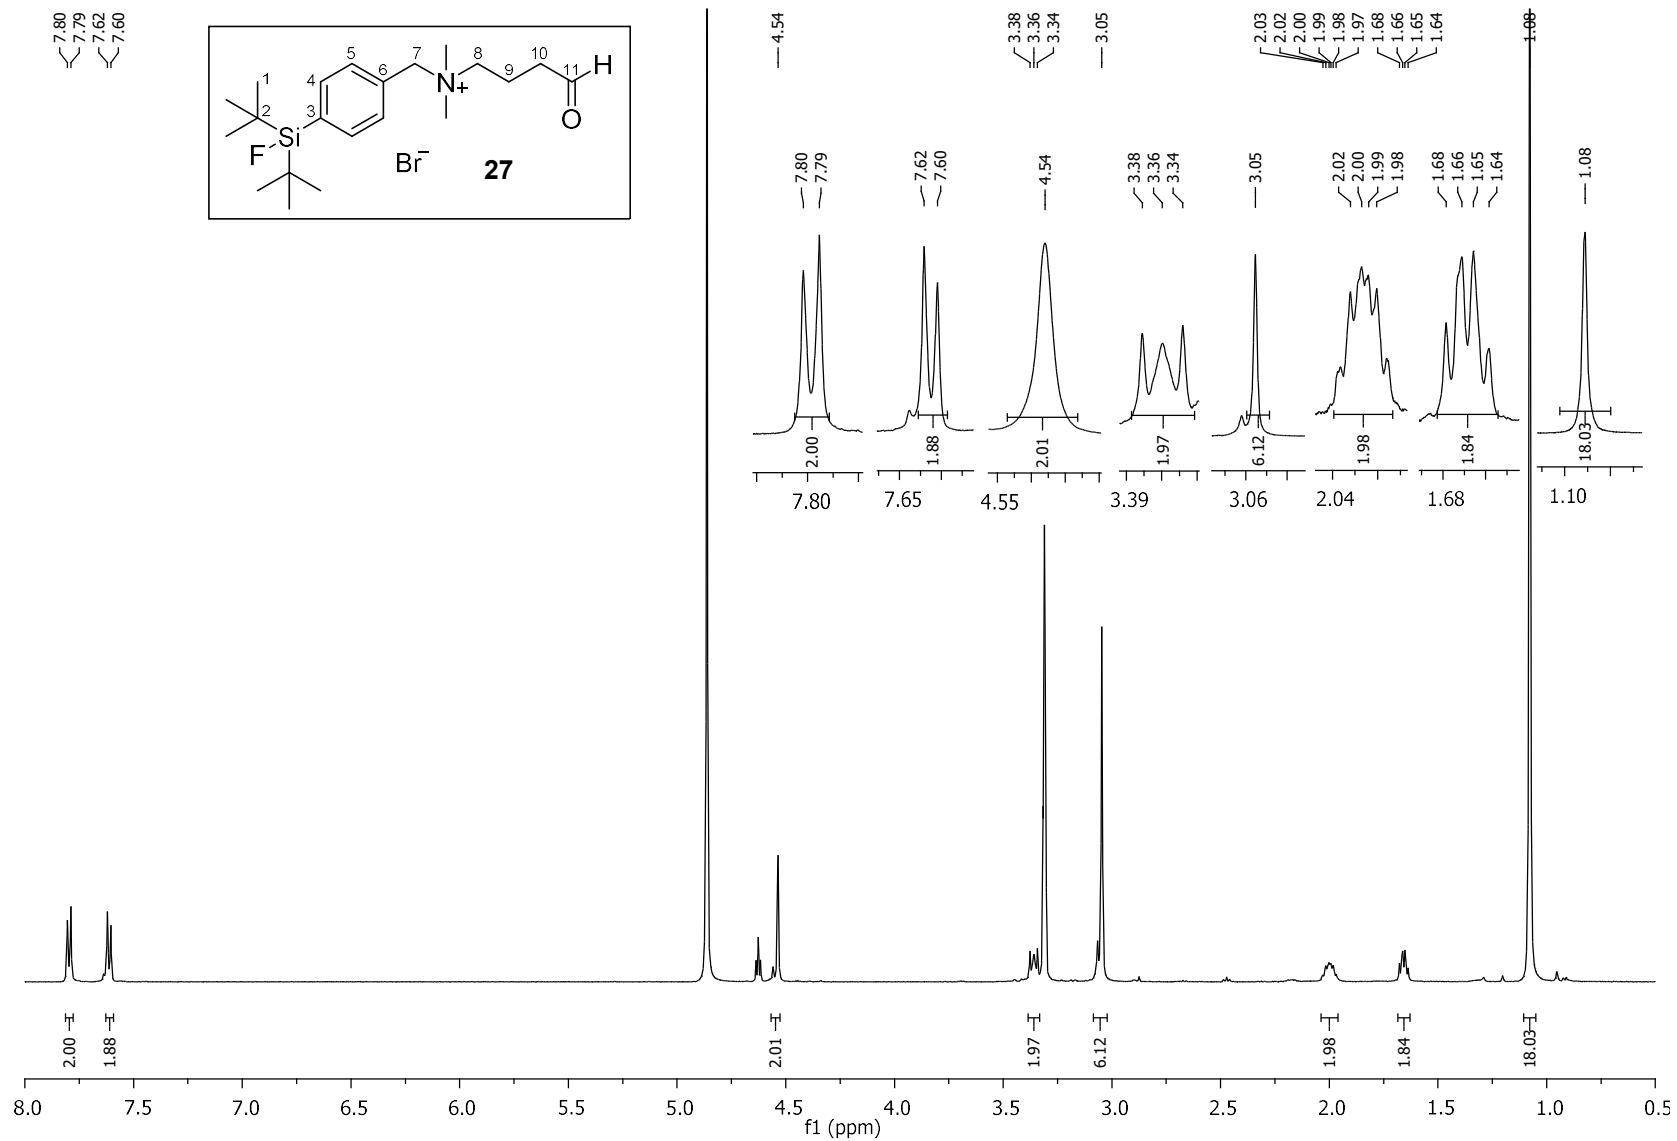

Figure S35. <sup>1</sup>H NMR spectrum of *N*-(4-(Di-*tert*-butylfluorosilyl)benzyl)-*N,N*-dimethyl-4-oxobutan-1-aminium bromide (**27**).



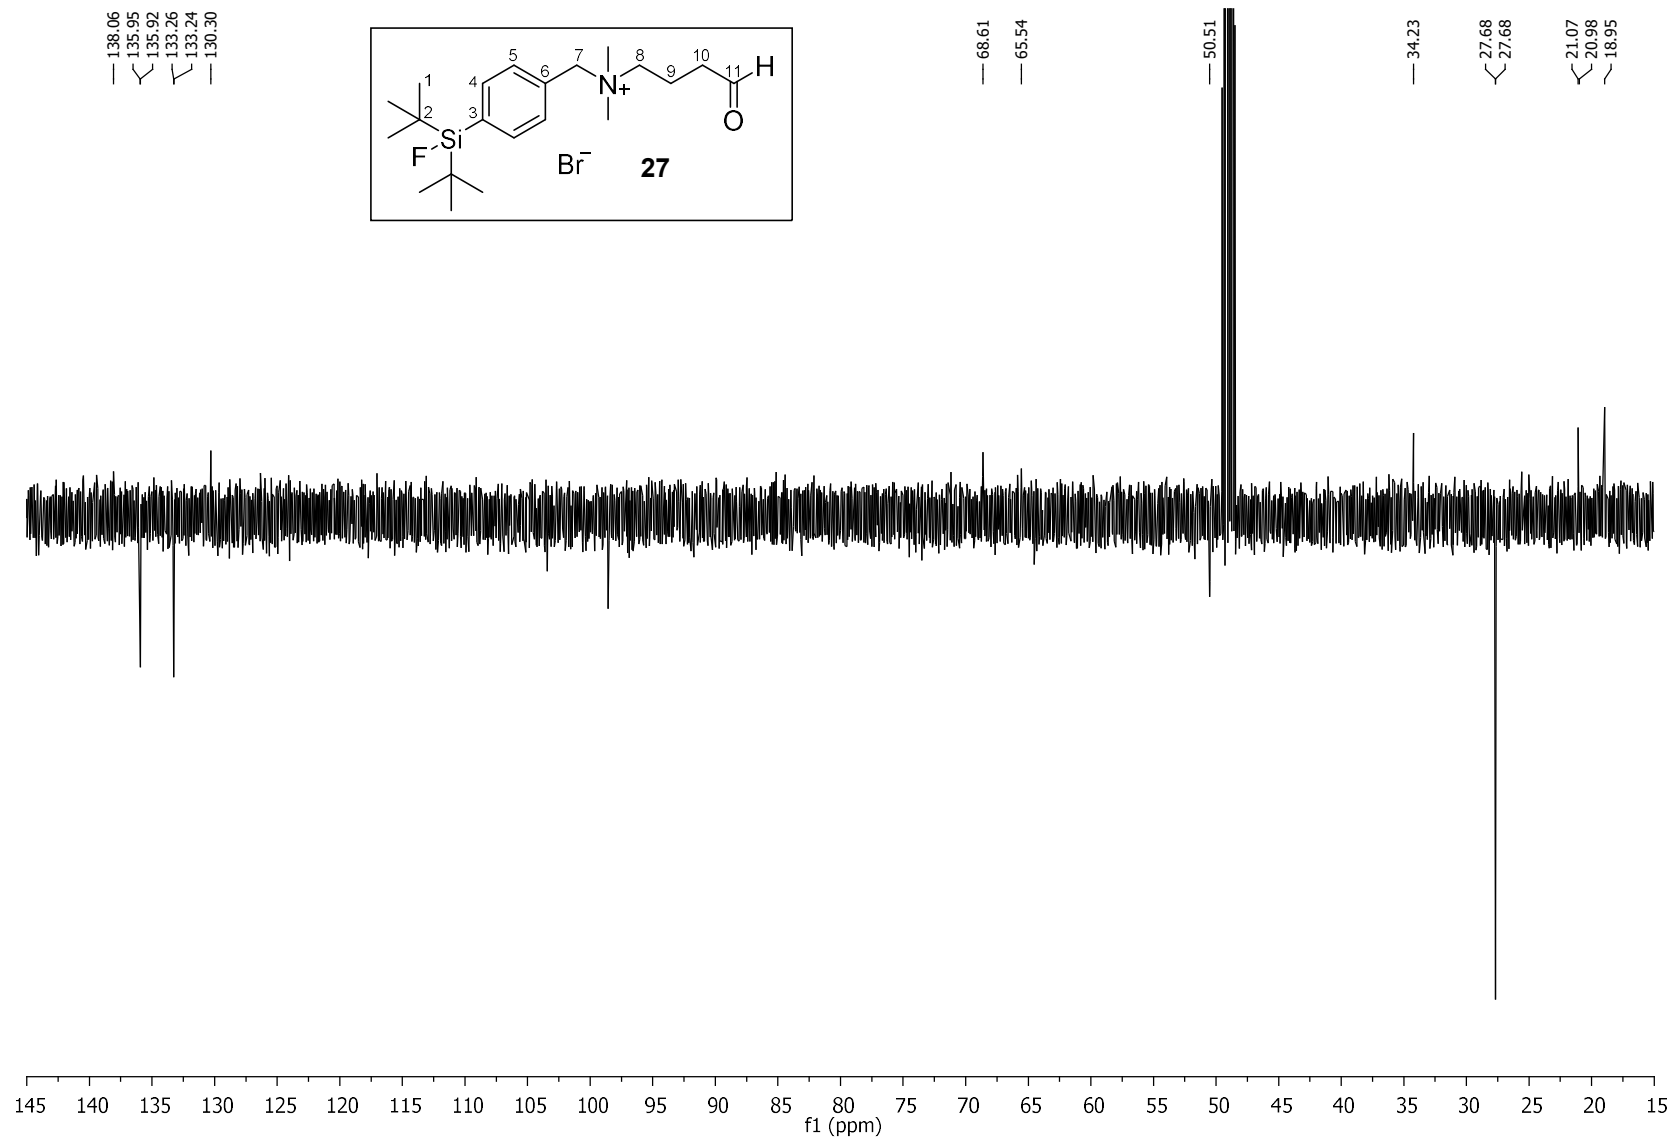

Figure S36. <sup>13</sup>C NMR spectrum of *N*-(4-(Di-*tert*-butylfluorosilyl)benzyl)-*N,N*-dimethyl-4-oxobutan-1-aminium bromide (**27**).

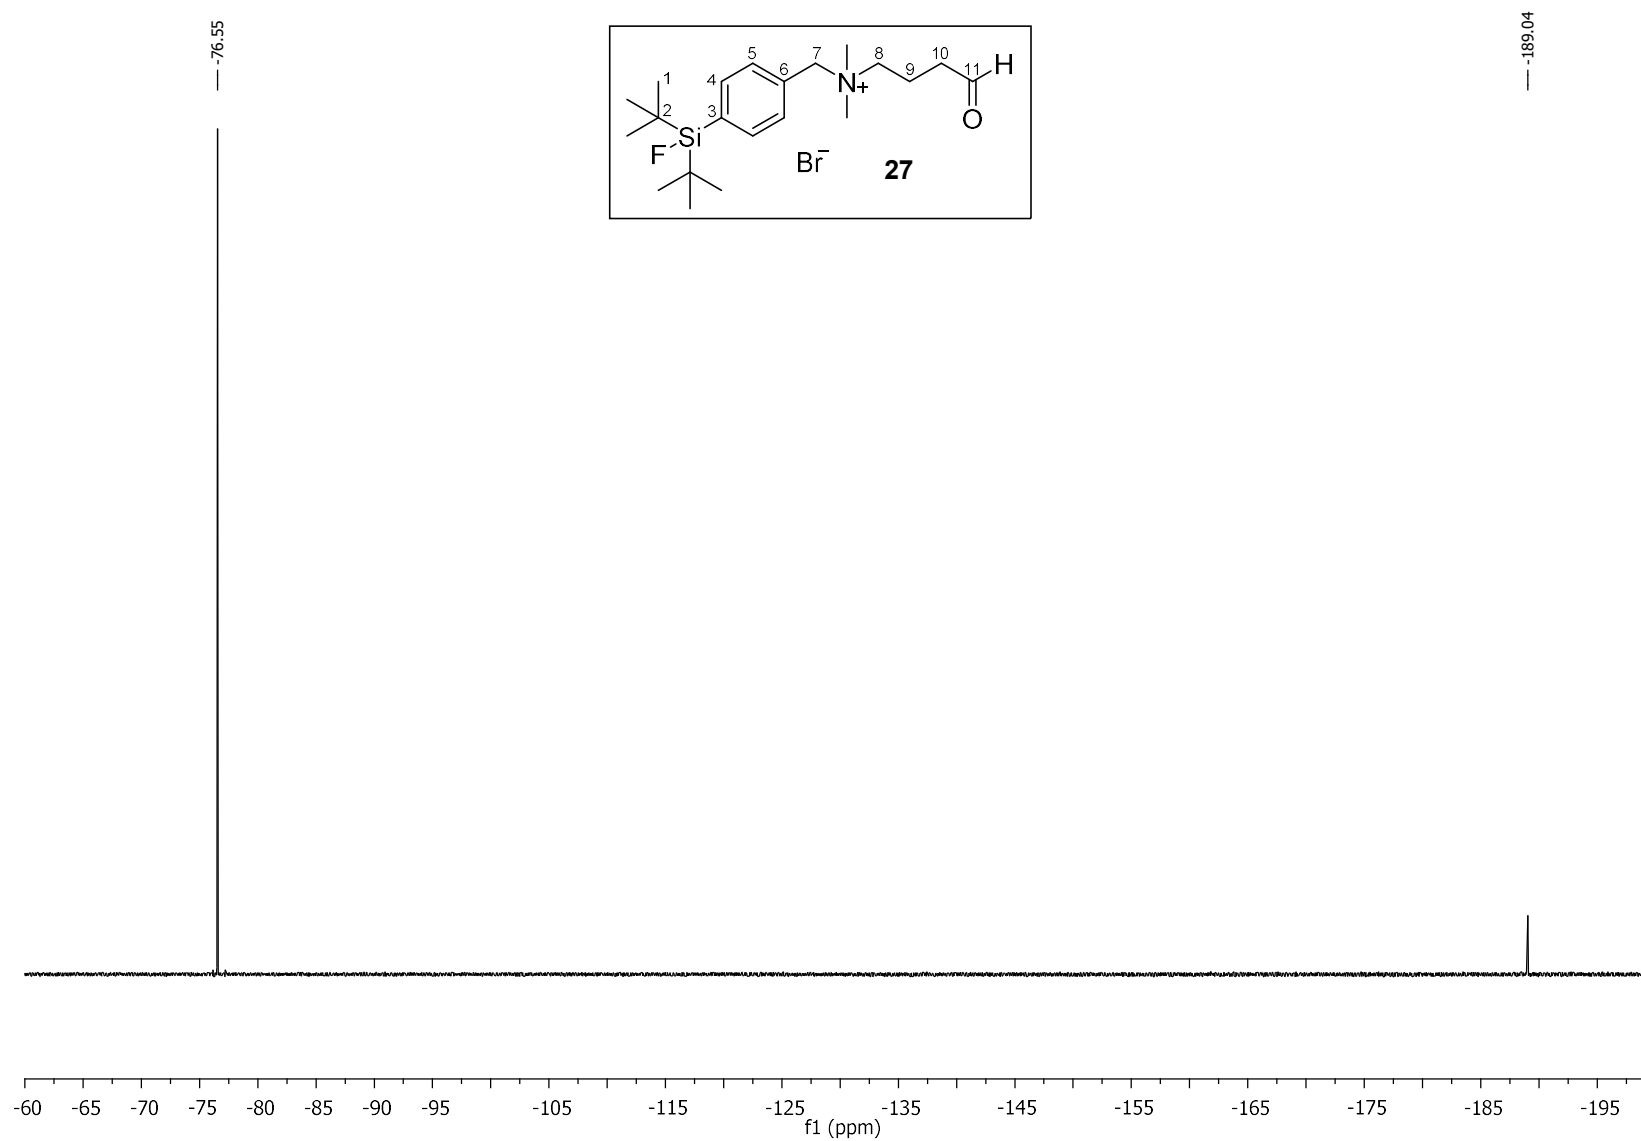

Figure S37.  $^{19}\text{F}$  NMR spectrum of *N*-(4-(Di-*tert*-butylfluorosilyl)benzyl)-*N,N*-dimethyl-4-oxobutan-1-aminium bromide (**27**).

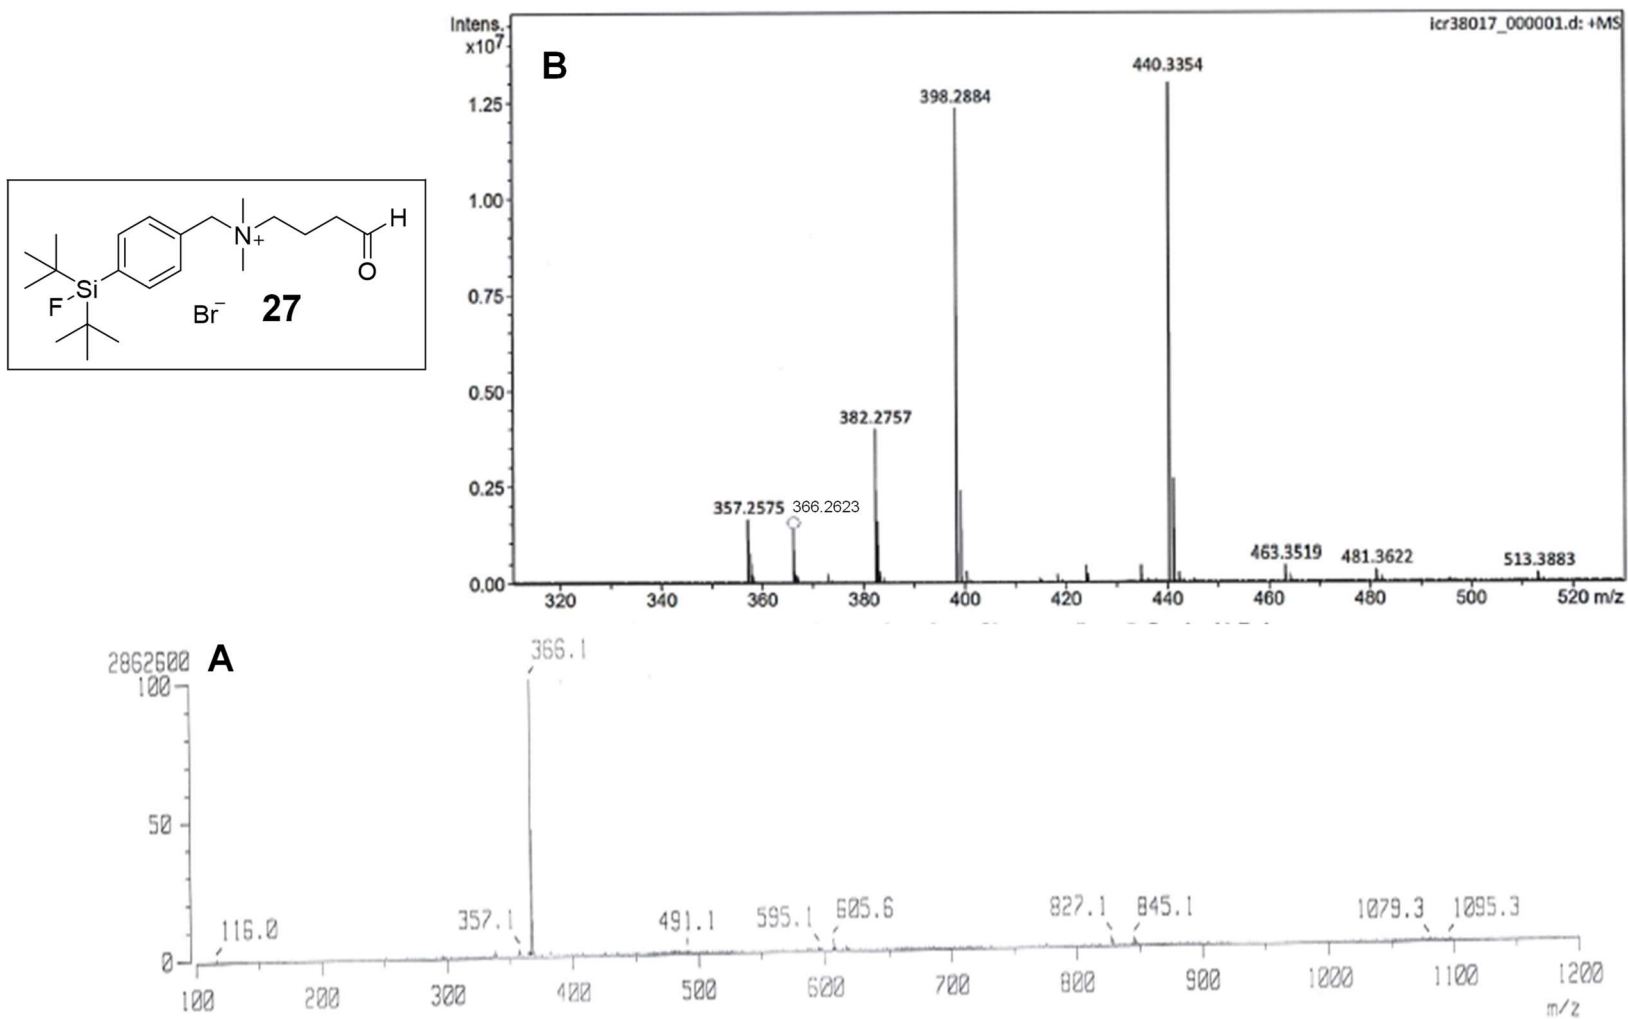

Figure S38. Mass spectra (**A**: FD, **B** ESI) of *N*-(4-(Di-*tert*-butylfluorosilyl)benzyl)-*N,N*-dimethyl-4-oxobutan-1-aminium bromide (**27**).

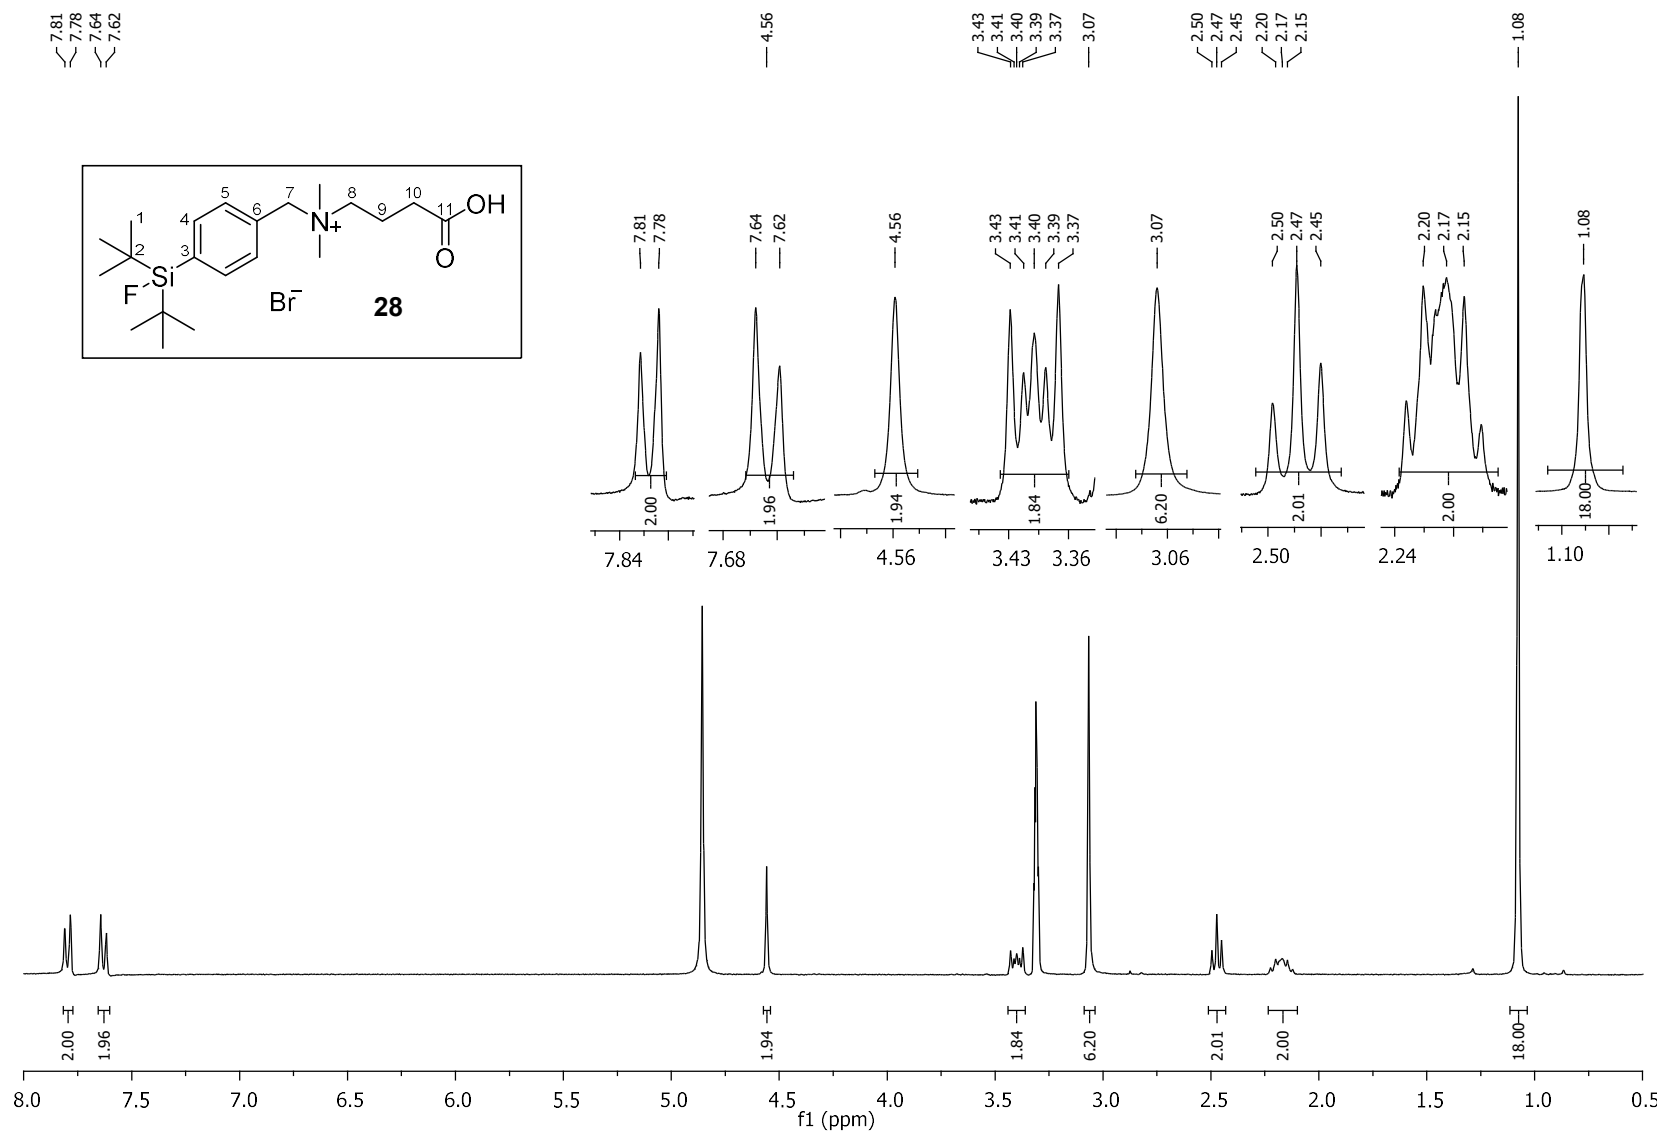

Figure S39. <sup>1</sup>H NMR spectrum of 3-Carboxy-N-(4-(di-*tert*-butylfluorosilyl)benzyl)-N,N-dimethylpropan-1-aminium bromide (**28**).

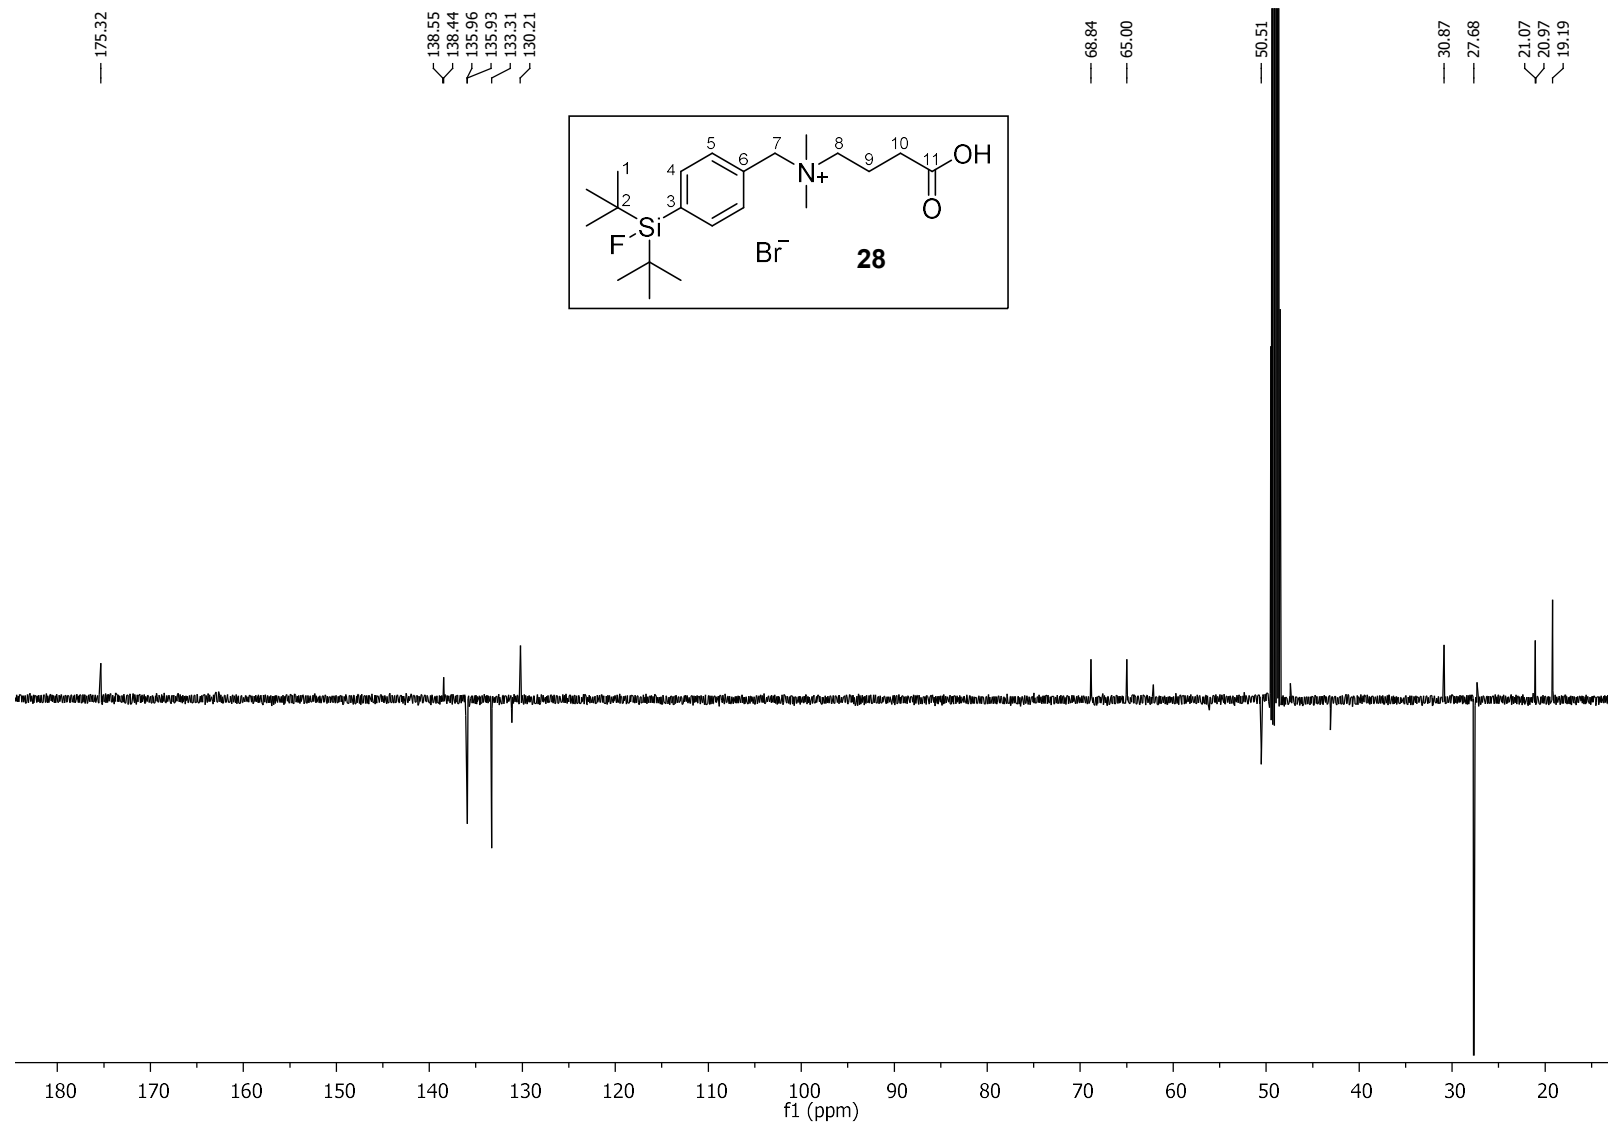

Figure S40. <sup>13</sup>C NMR spectrum of 3-Carboxy-N-(4-(di-*tert*-butylfluorosilyl)benzyl)-N,N-dimethylpropan-1-aminium bromide (**28**).

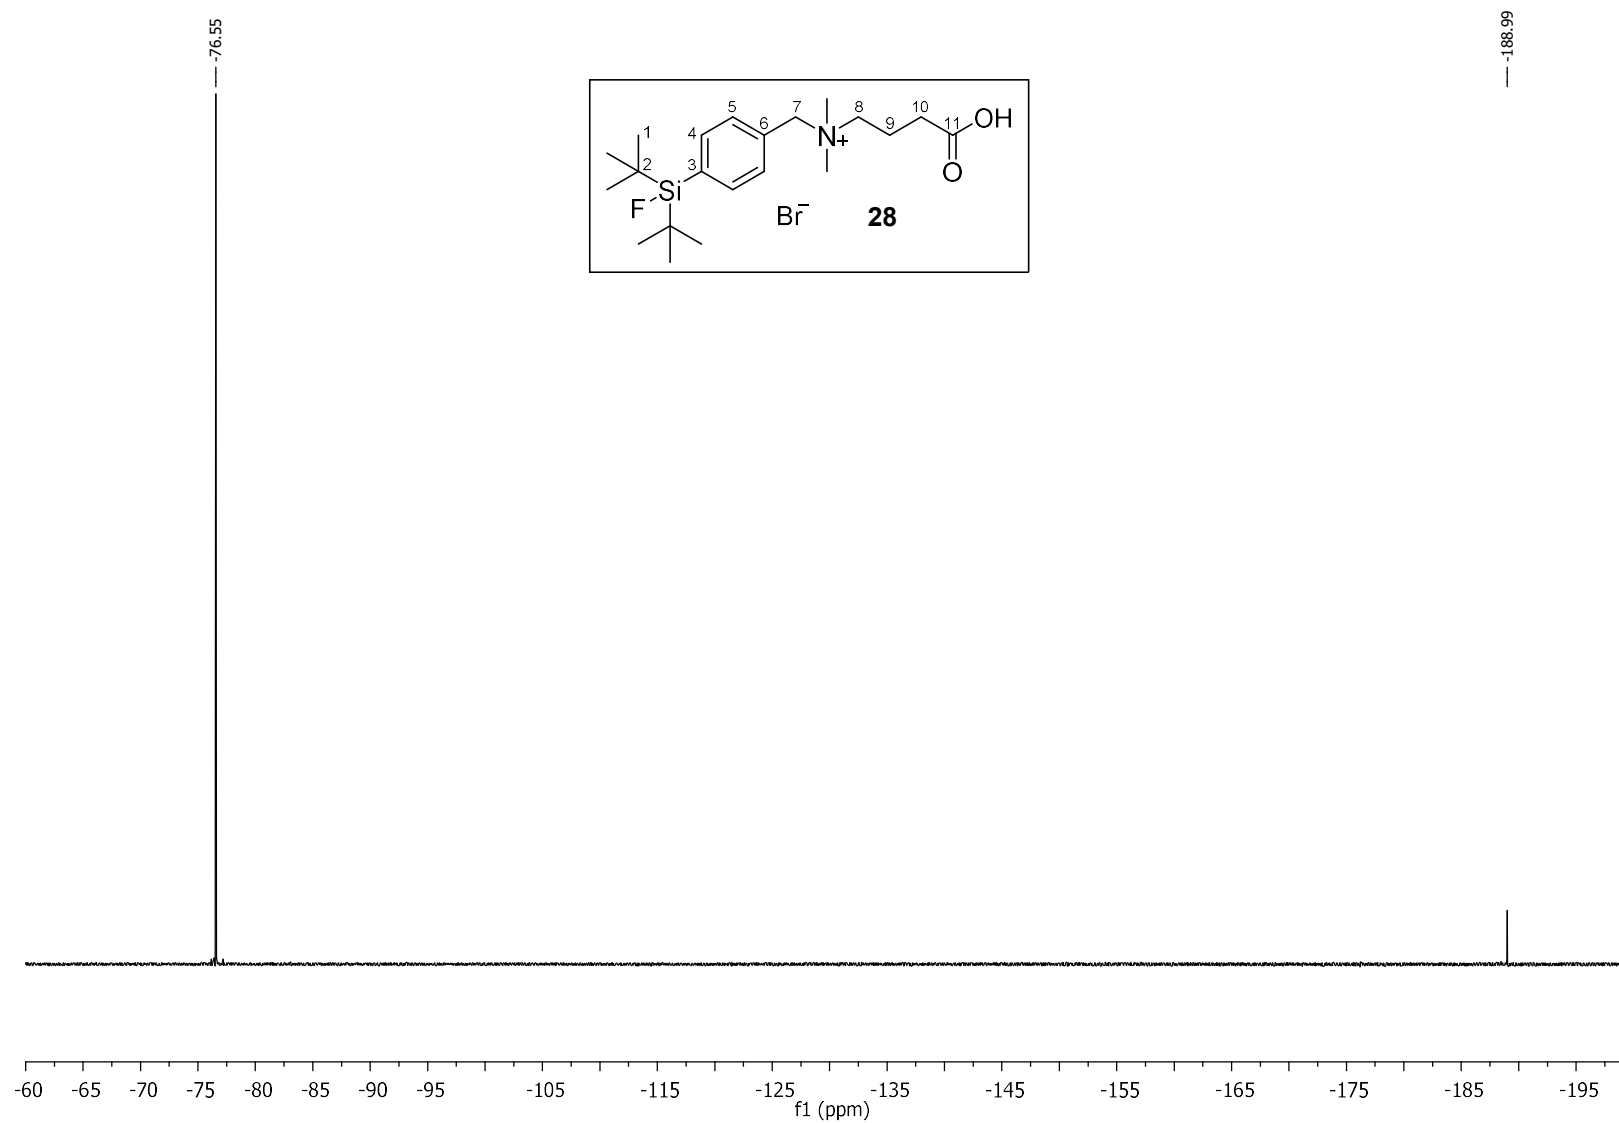

Figure S41. <sup>19</sup>F NMR spectrum of 3-Carboxy-N-(4-(di-*tert*-butylfluorosilyl)benzyl)-N,N-dimethylpropan-1-aminium bromide (**28**).

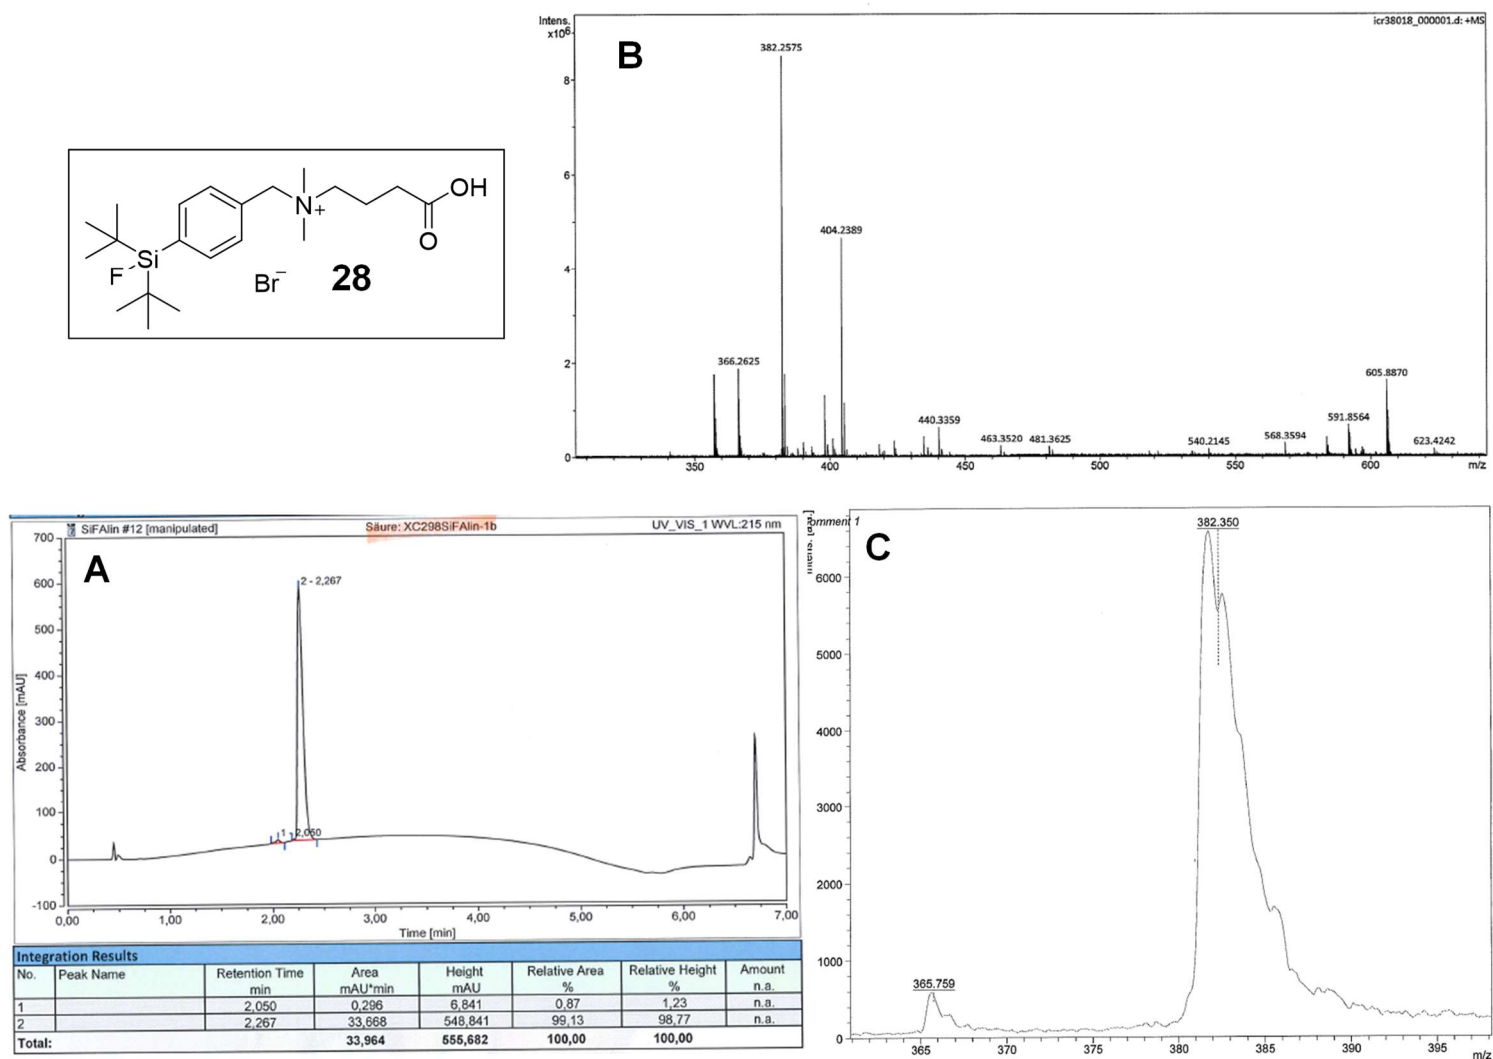

Figure S42. HPLC chromatogram (A) and mass spectra (B: ESI, C MALDI) of 3-Carboxy-*N*-(4-(di-*tert*-butylfluorosilyl)benzyl)-*N,N*-dimethylpropan-1-aminium bromide (28).

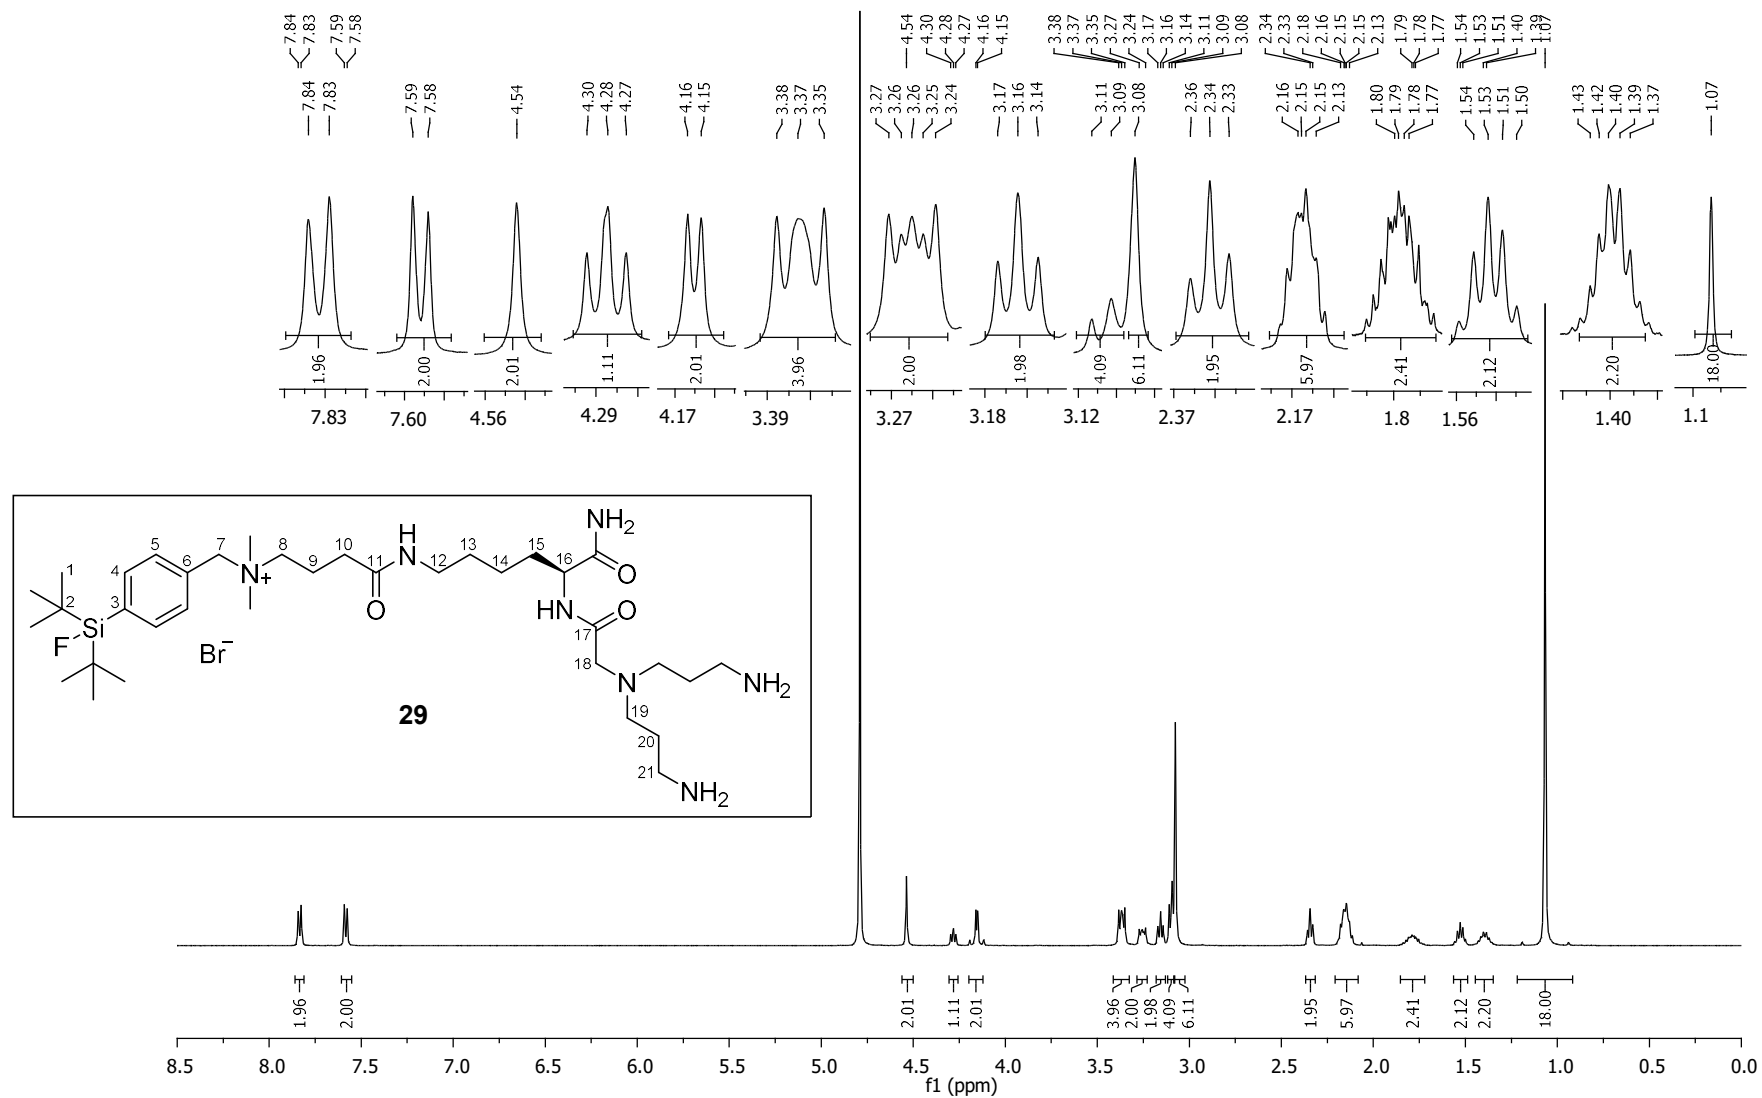

Figure S43. <sup>1</sup>H NMR spectrum of (S)-4-((6-Amino-5-(2-(bis(3-aminopropyl)amino)acetamido)-6-oxohexyl)amino)-N-(4-(di-*tert*-butylfluorosilyl)benzyl)-N,N-dimethyl-4-oxobutan-1-aminium bromide (**29**).



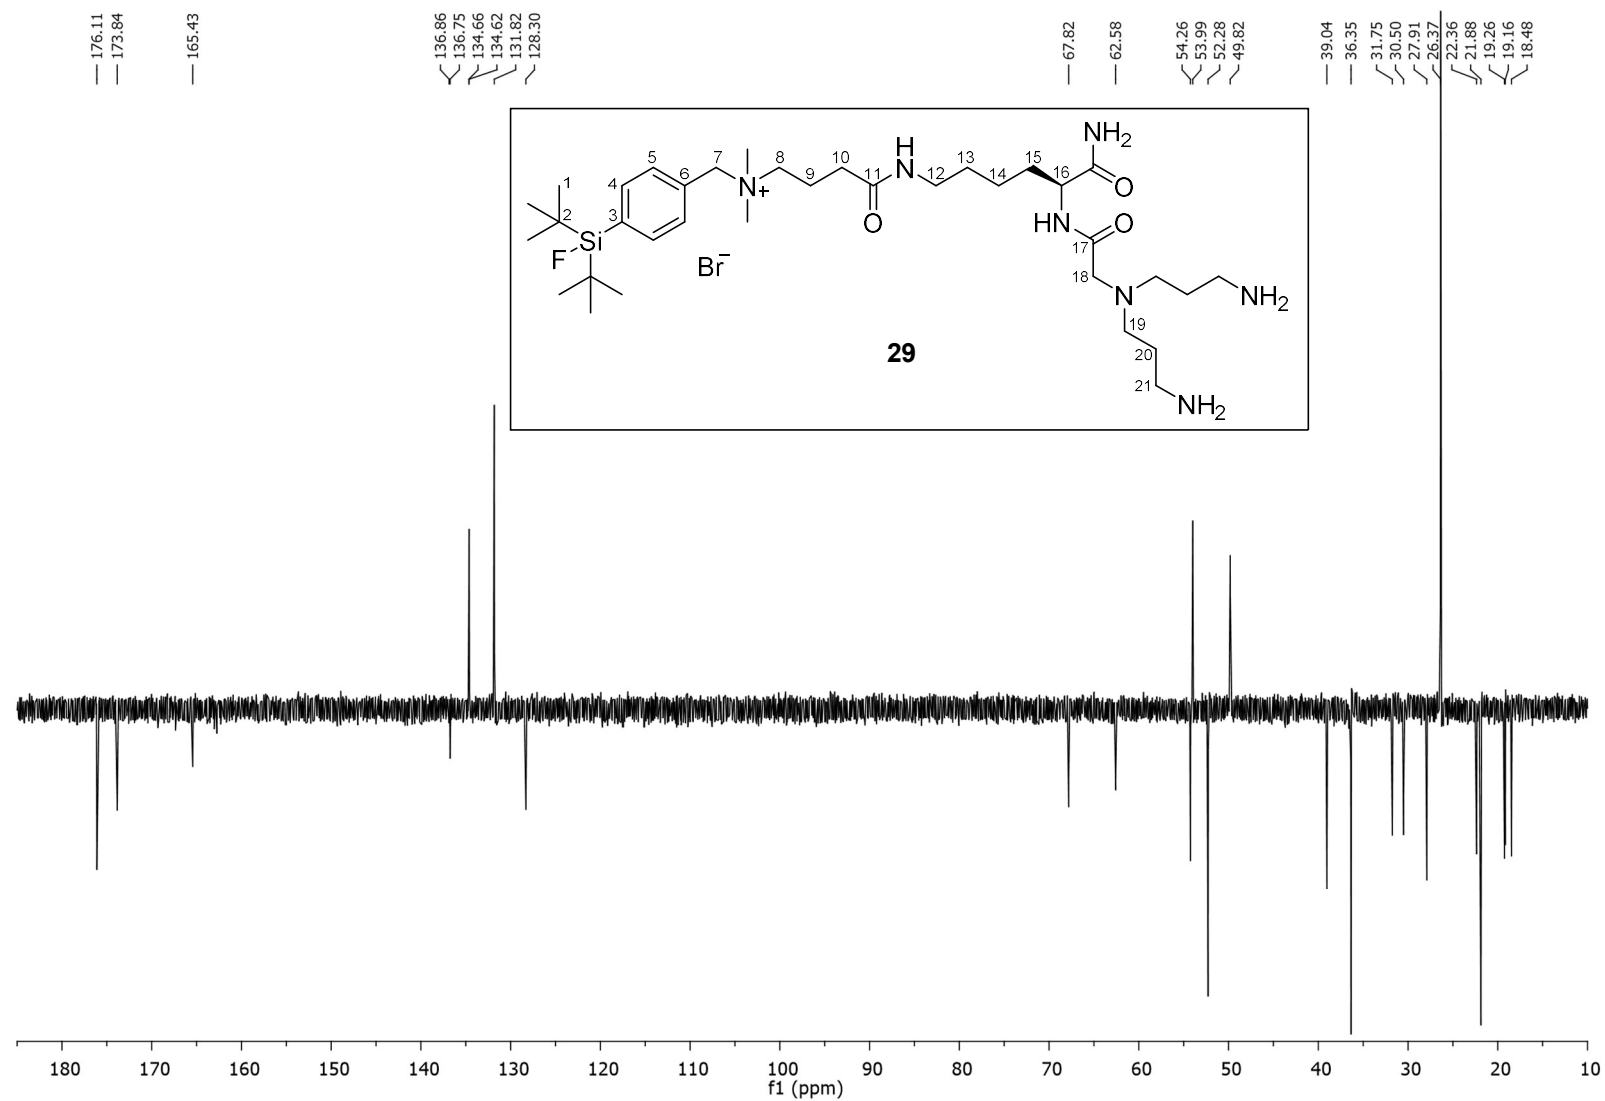

Figure S44. <sup>13</sup>C NMR spectrum of (S)-4-((6-Amino-5-(2-(bis(3-aminopropyl)amino)acetamido)-6-oxohexyl)amino)-N-(4-(di-*tert*-butylfluorosilyl)benzyl)-N,N-dimethyl-4-oxobutan-1-aminium bromide (**29**).

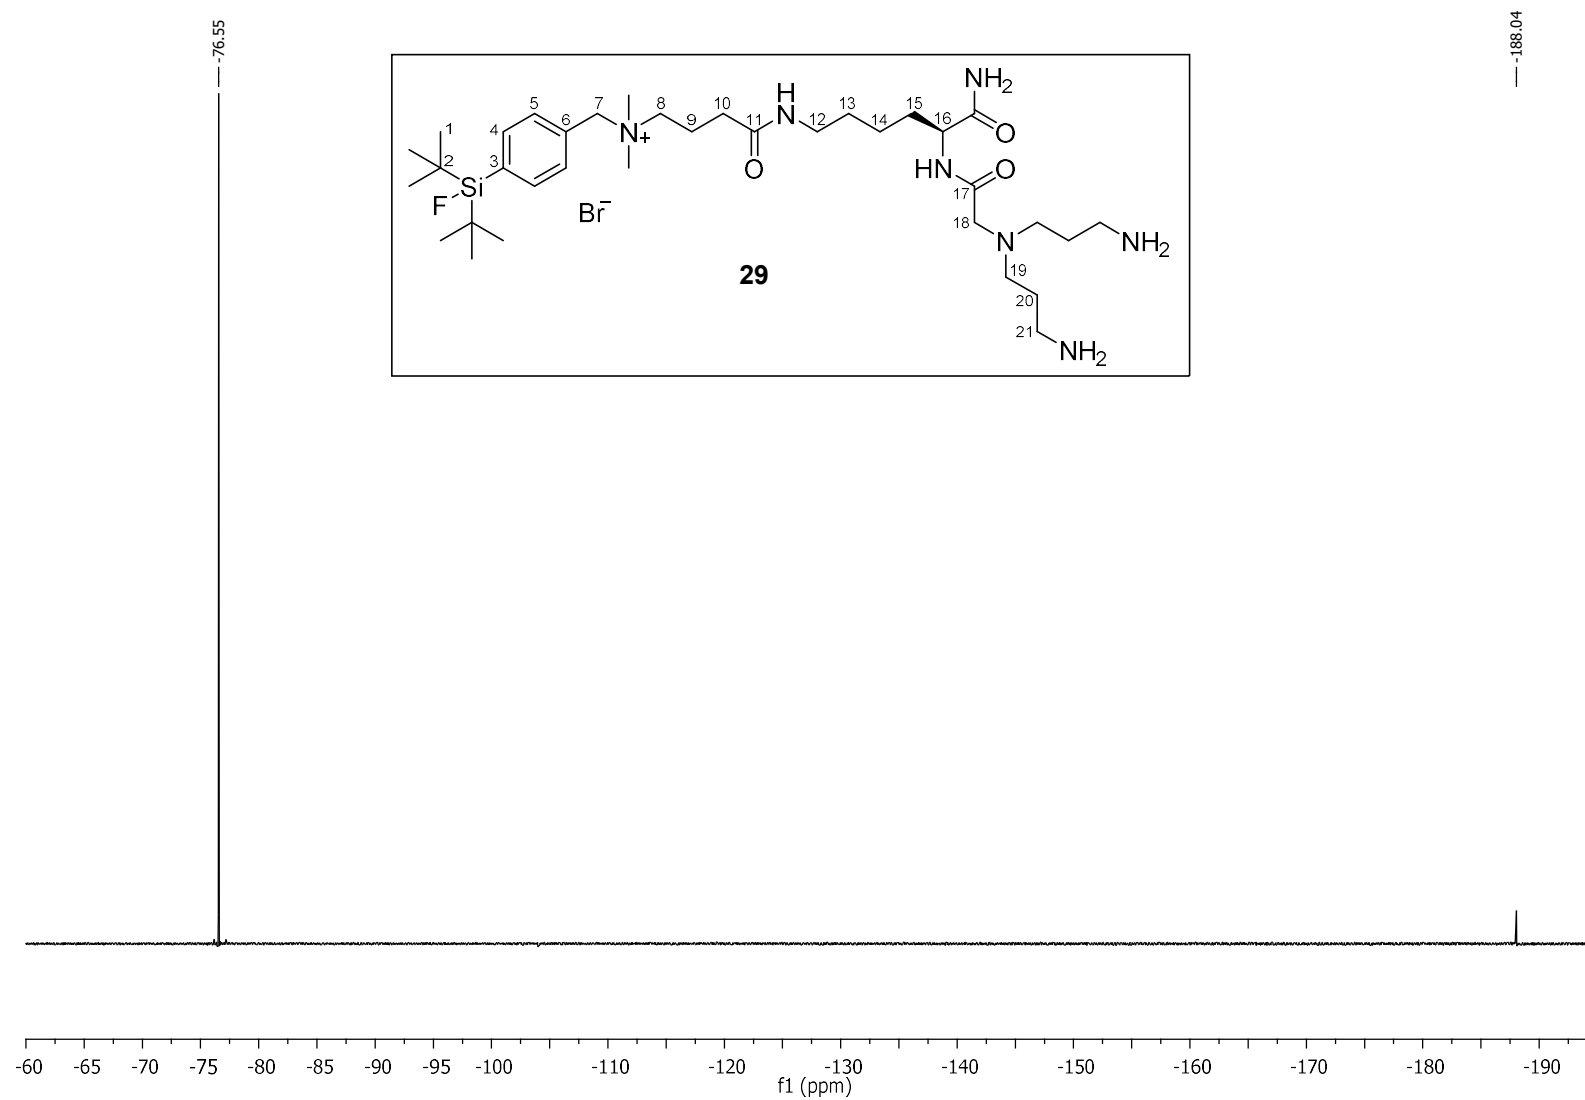

Figure S45.  $^{19}\text{F}$  NMR spectrum of (S)-4-((6-Amino-5-(2-(bis(3-aminopropyl)amino)acetamido)-6-oxohexyl)amino)-N-(4-(di-*tert*-butylfluorosilyl)benzyl)-N,N-dimethyl-4-oxobutan-1-aminium bromide (**29**).



### 3. Mass and $^{19}\text{F}$ -NMR spectra of HBPLs 1–6 and mass spectra of their intermediates 30–35

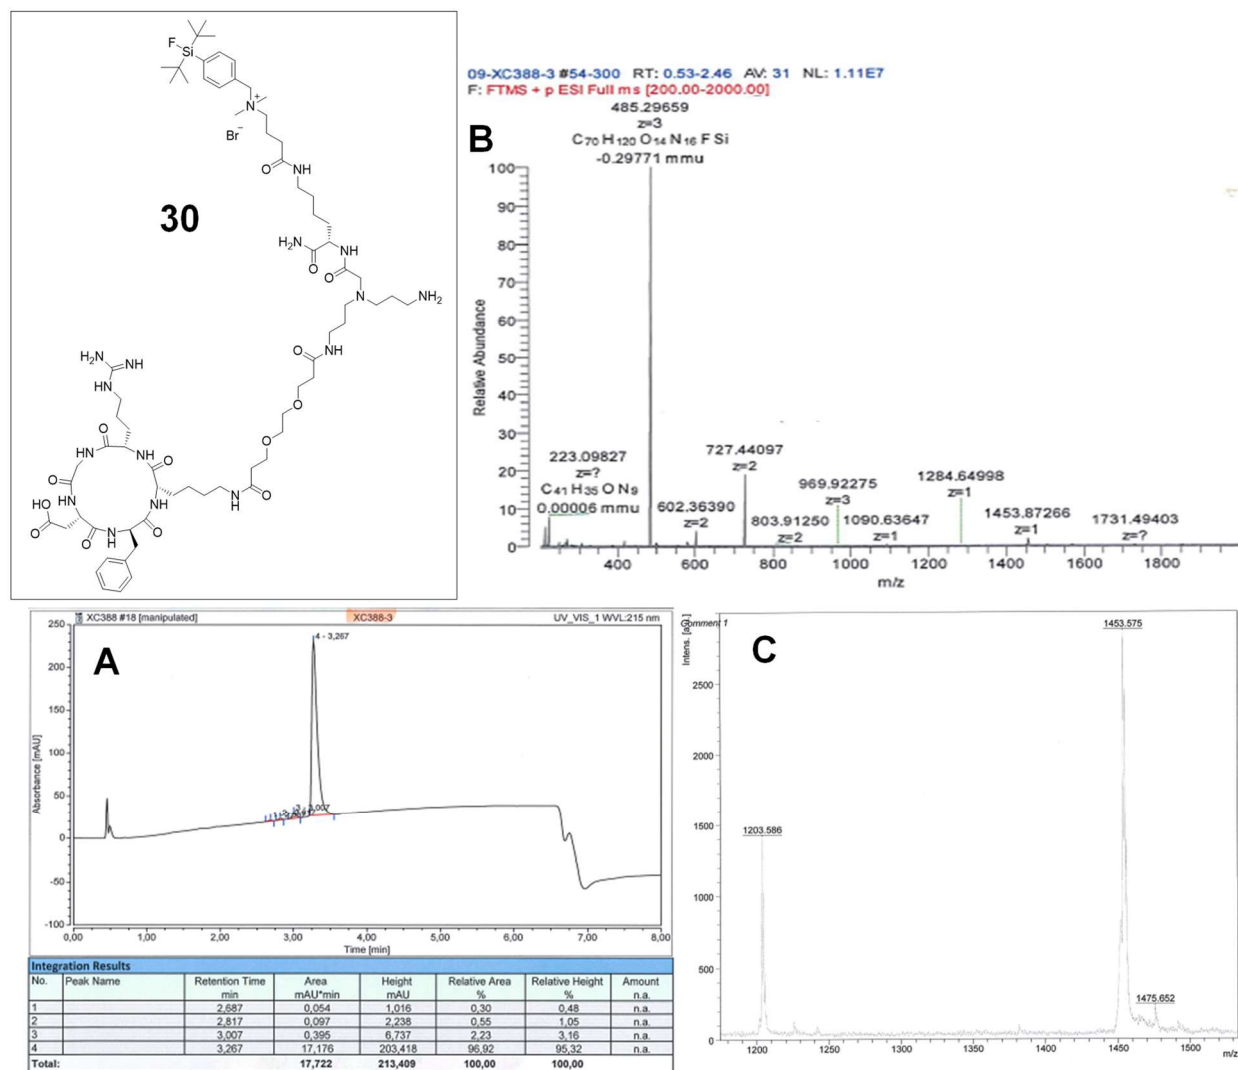

Figure S47. HPLC chromatogram (**A**) and mass spectra (**B**: ESI, **C**: MALDI) of SiFA/in-APG-PEG<sub>1</sub>-c(RGDfK) (**30**).

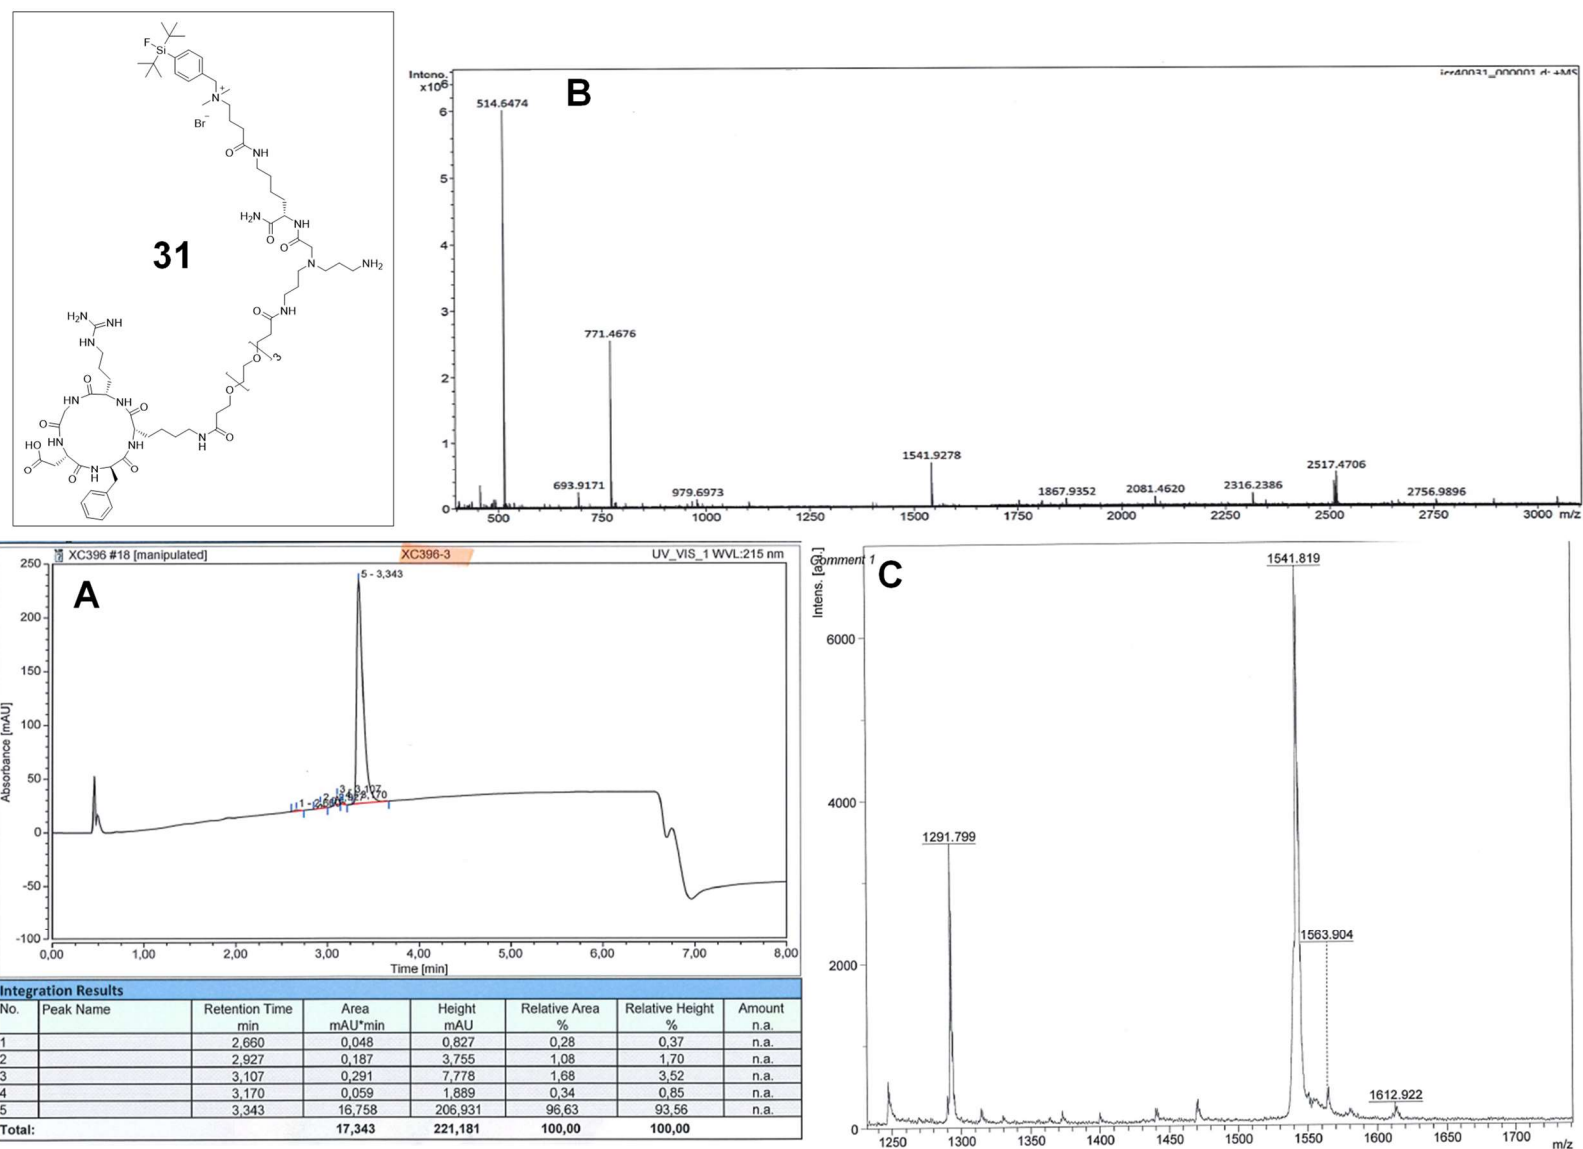

Figure S48. HPLC chromatogram (A) and mass spectra (B: ESI, C: MALDI) of SiFAlin-APG-PEG<sub>3</sub>-c(RGDfK) (31).

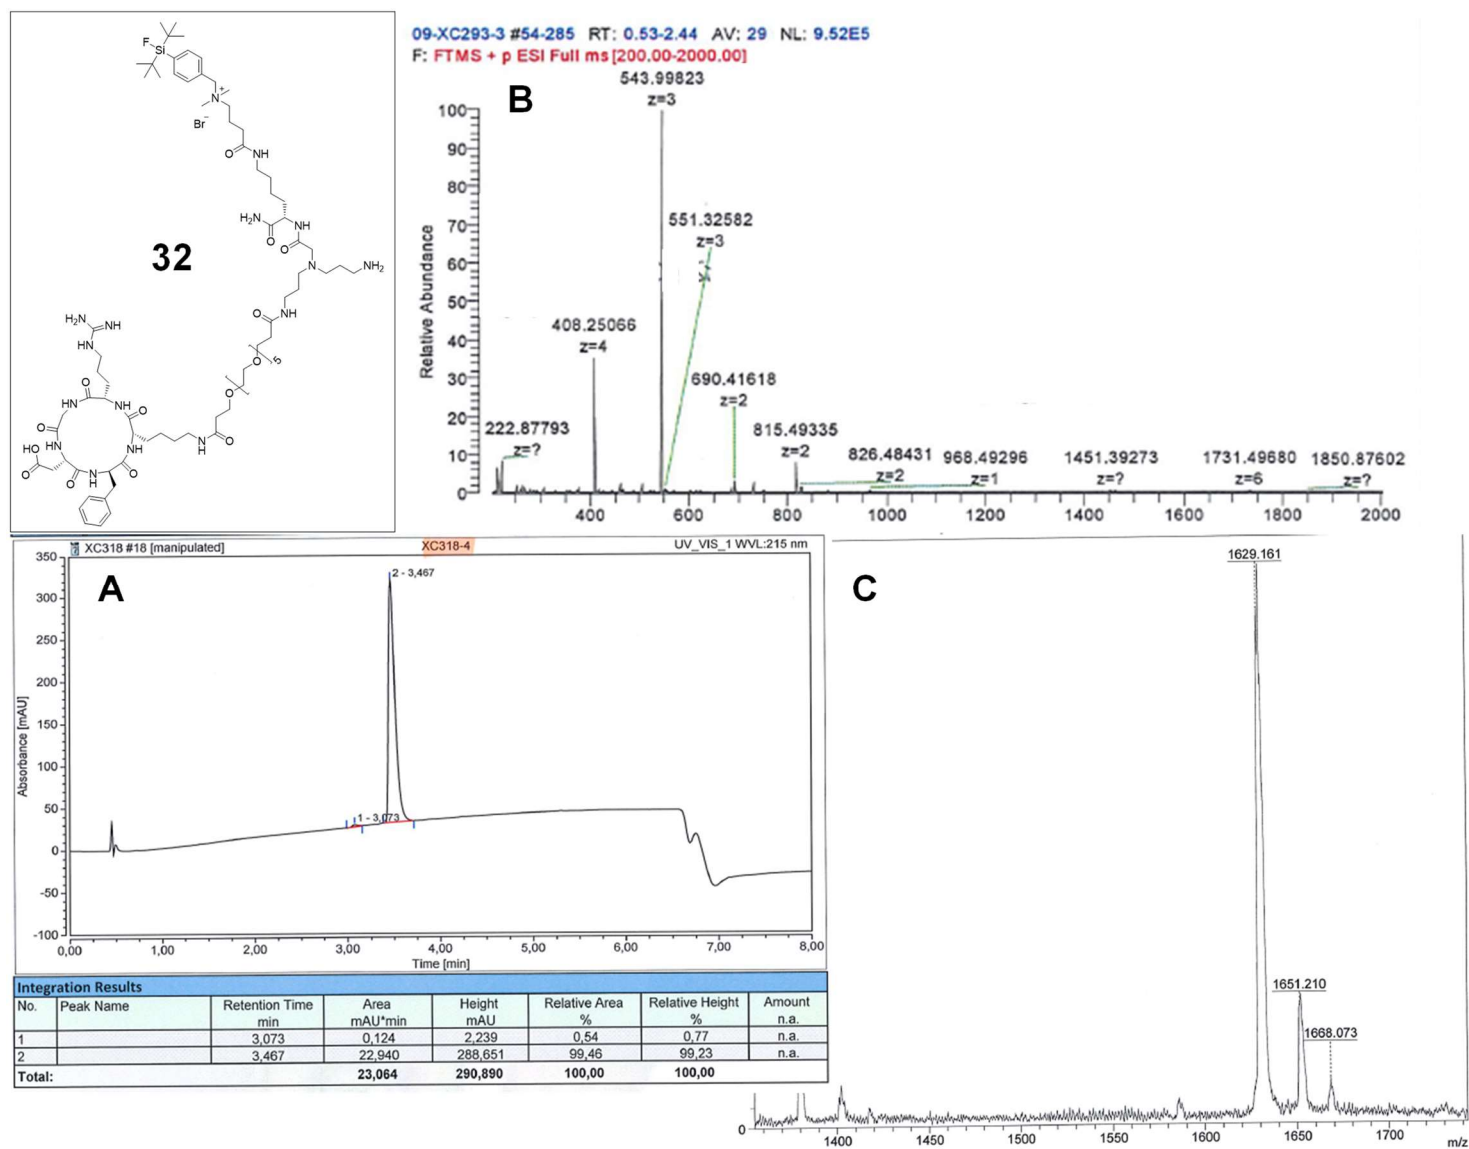

Figure S49. HPLC chromatogram (A) and mass spectra (B: ESI, C: MALDI) of SiFA/in-APG-PEG<sub>5</sub>-c(RGDfK) (32).

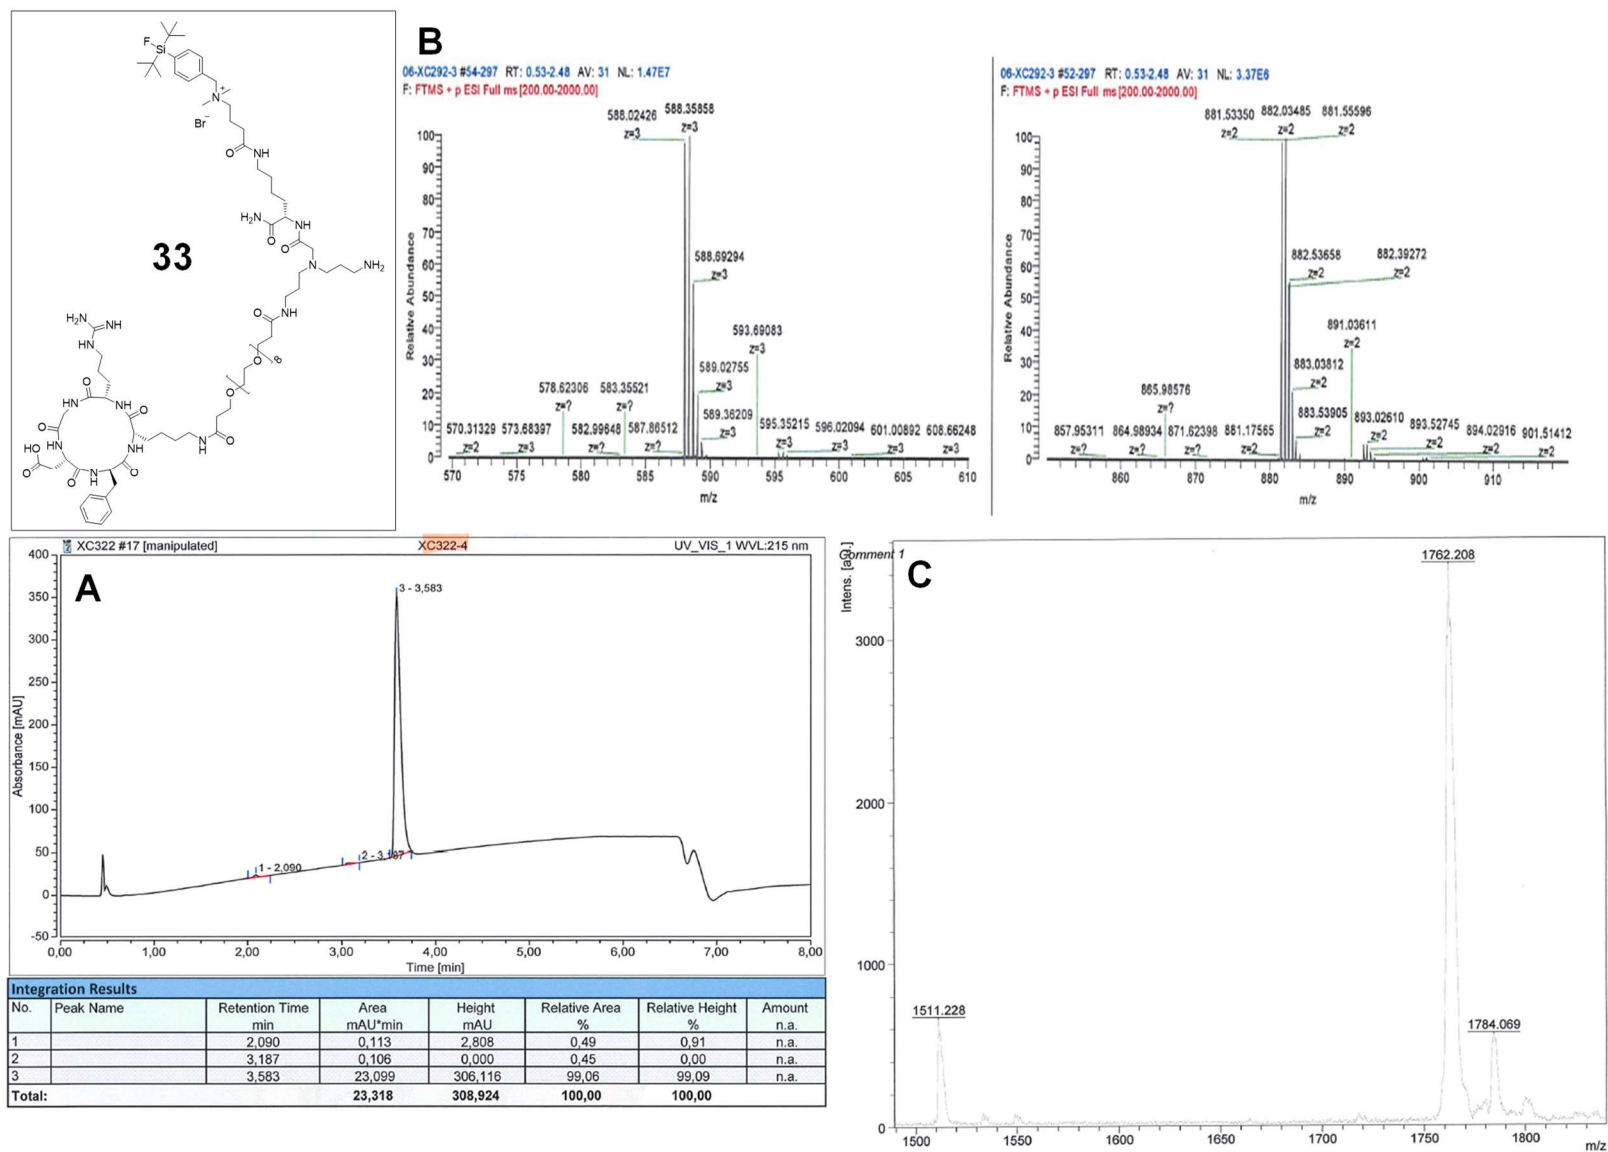

Figure S50. HPLC chromatogram (A) and mass spectra (B: ESI, C: MALDI) of SiFAlin-APG-PEG<sub>8</sub>-c(RGDfK) (33).

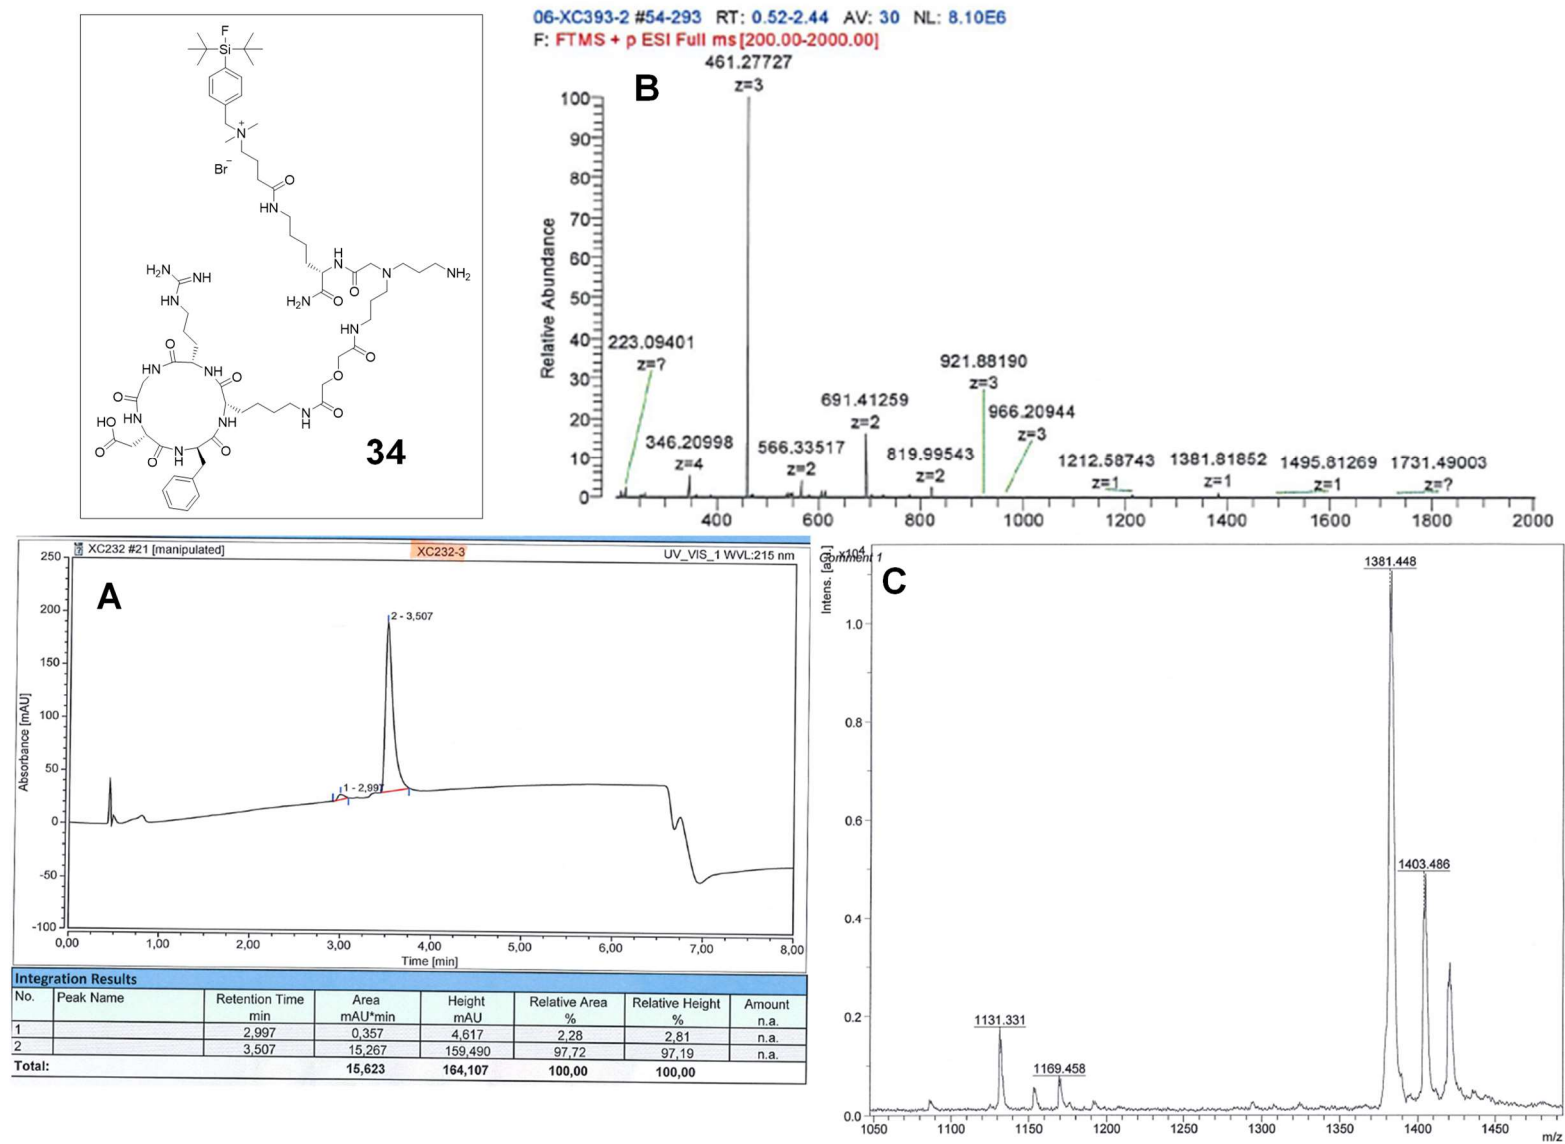

Figure S51. HPLC chromatogram (**A**) and mass spectra (**B**: ESI, **C**: MALDI) of SiFA/in-APG-DIG-c(RGDfK) (**34**).



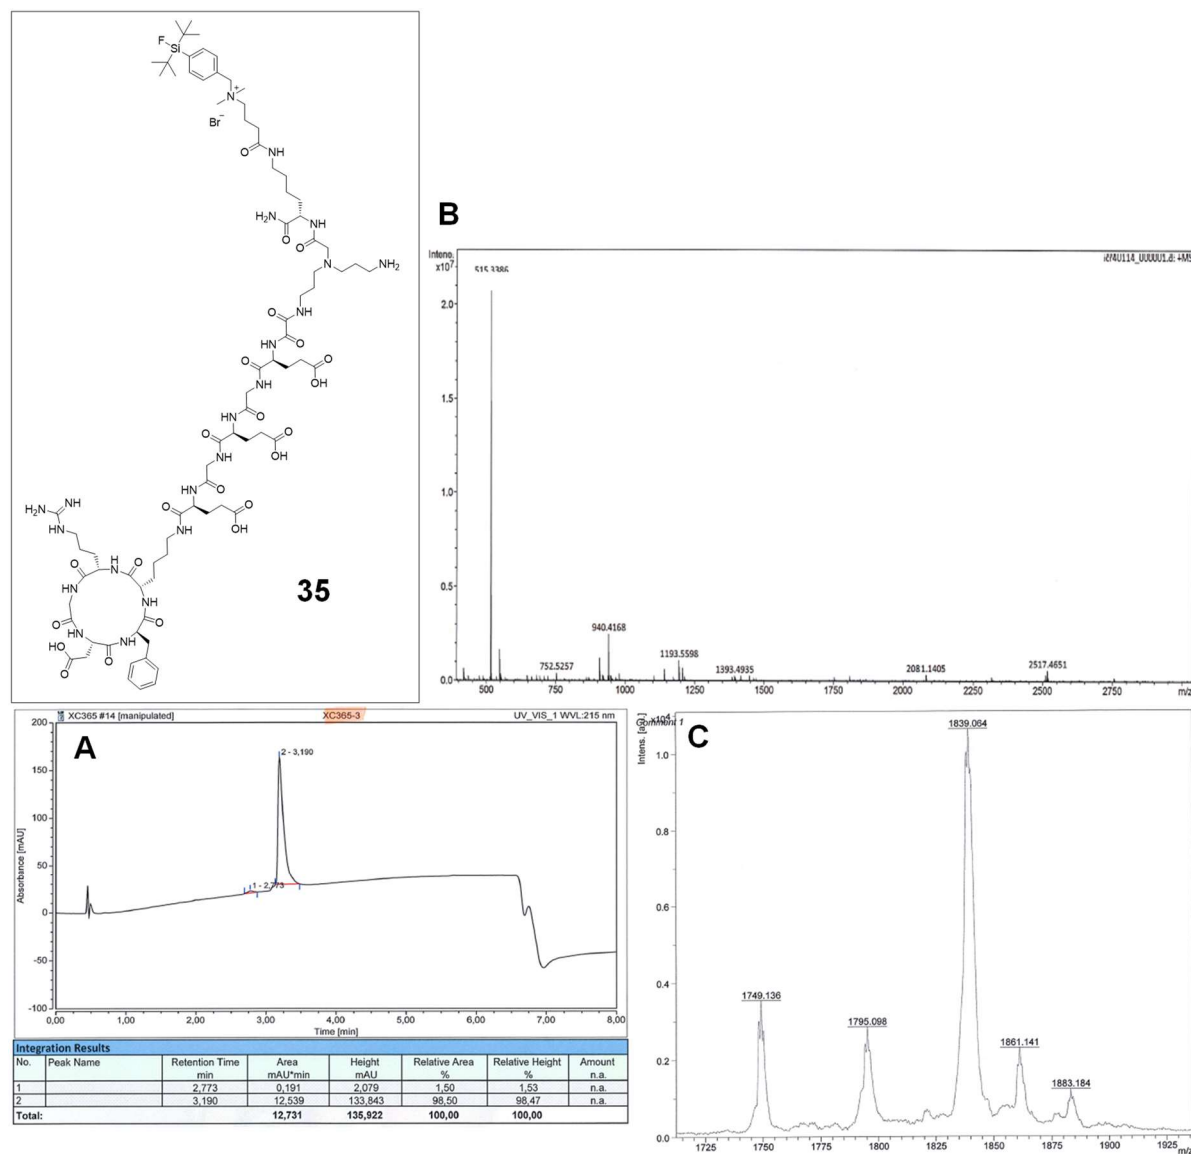

Figure S52. HPLC chromatogram (**A**) and mass spectra (**B**: ESI, **C**: MALDI) of SiFAlin-APG-Ox-EGEGE-c(RGDfK) (**35**).

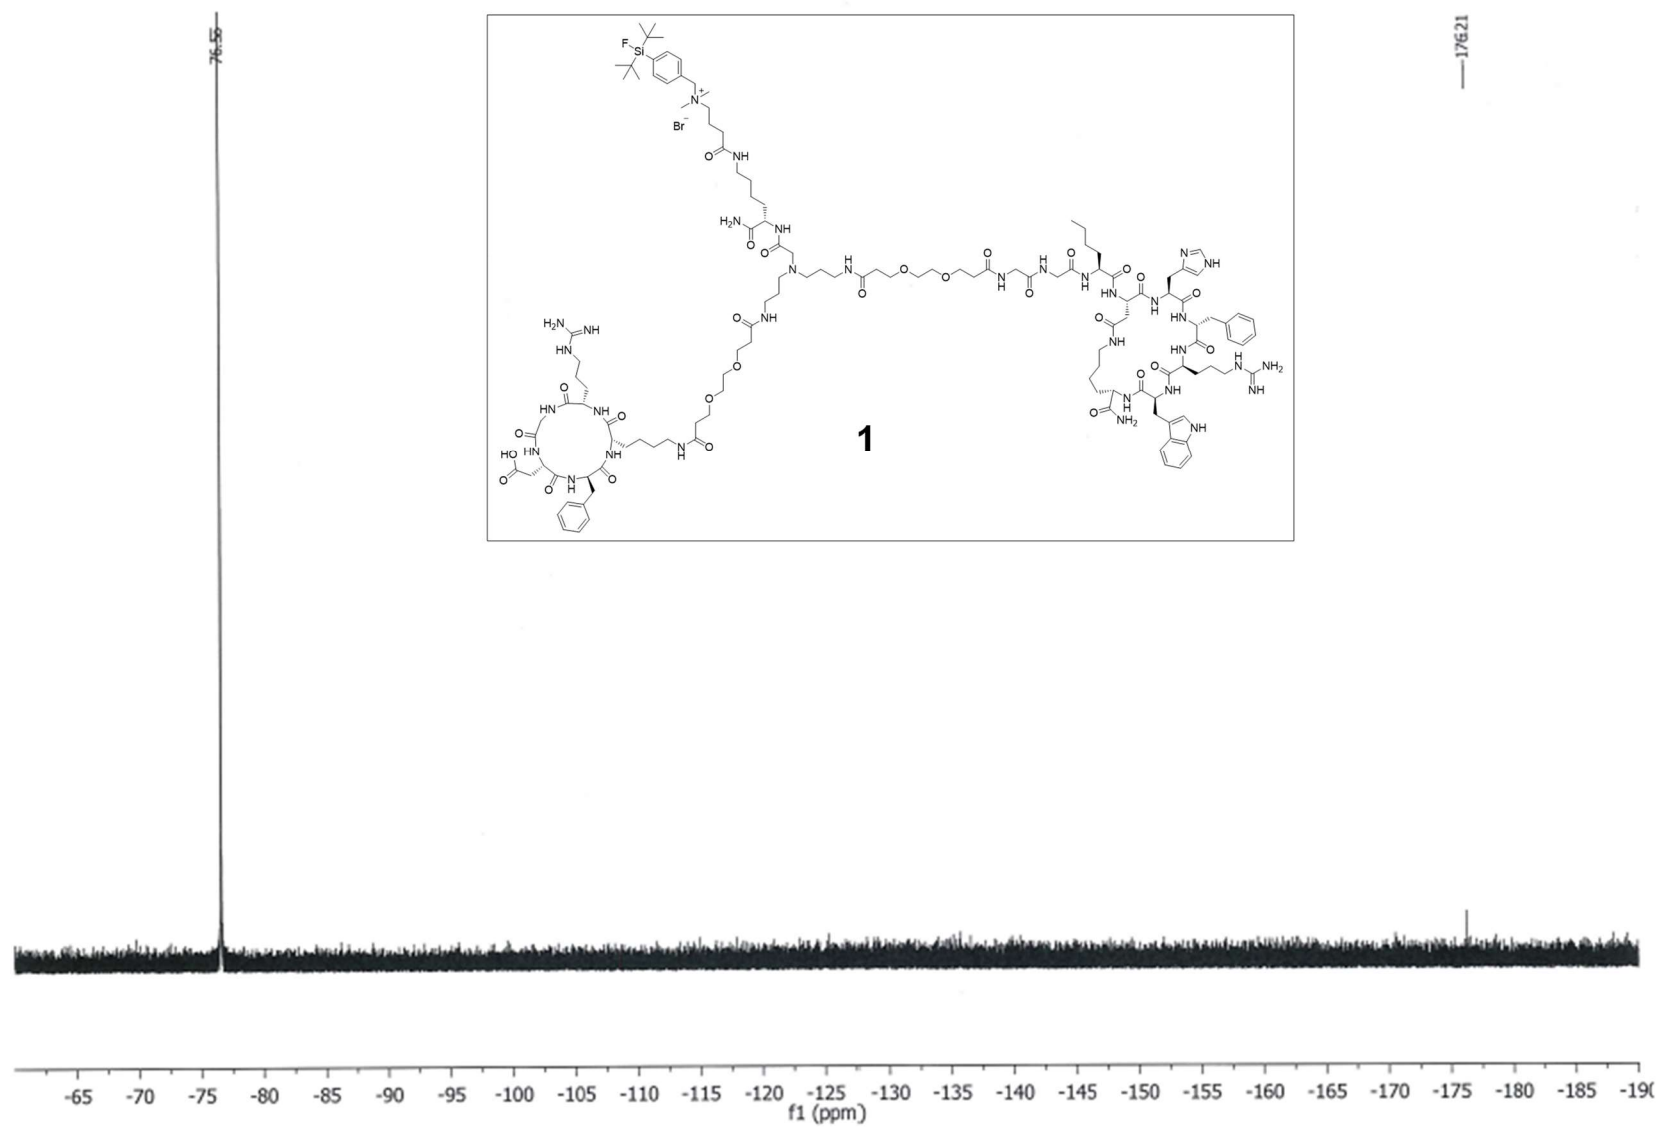

Figure S53.  $^{19}\text{F}$  NMR spectrum of SiFA/*in*-APG-PEG<sub>1</sub>-c(RGDfK)/GG-Nle-c(DHfRWK) (**1**).

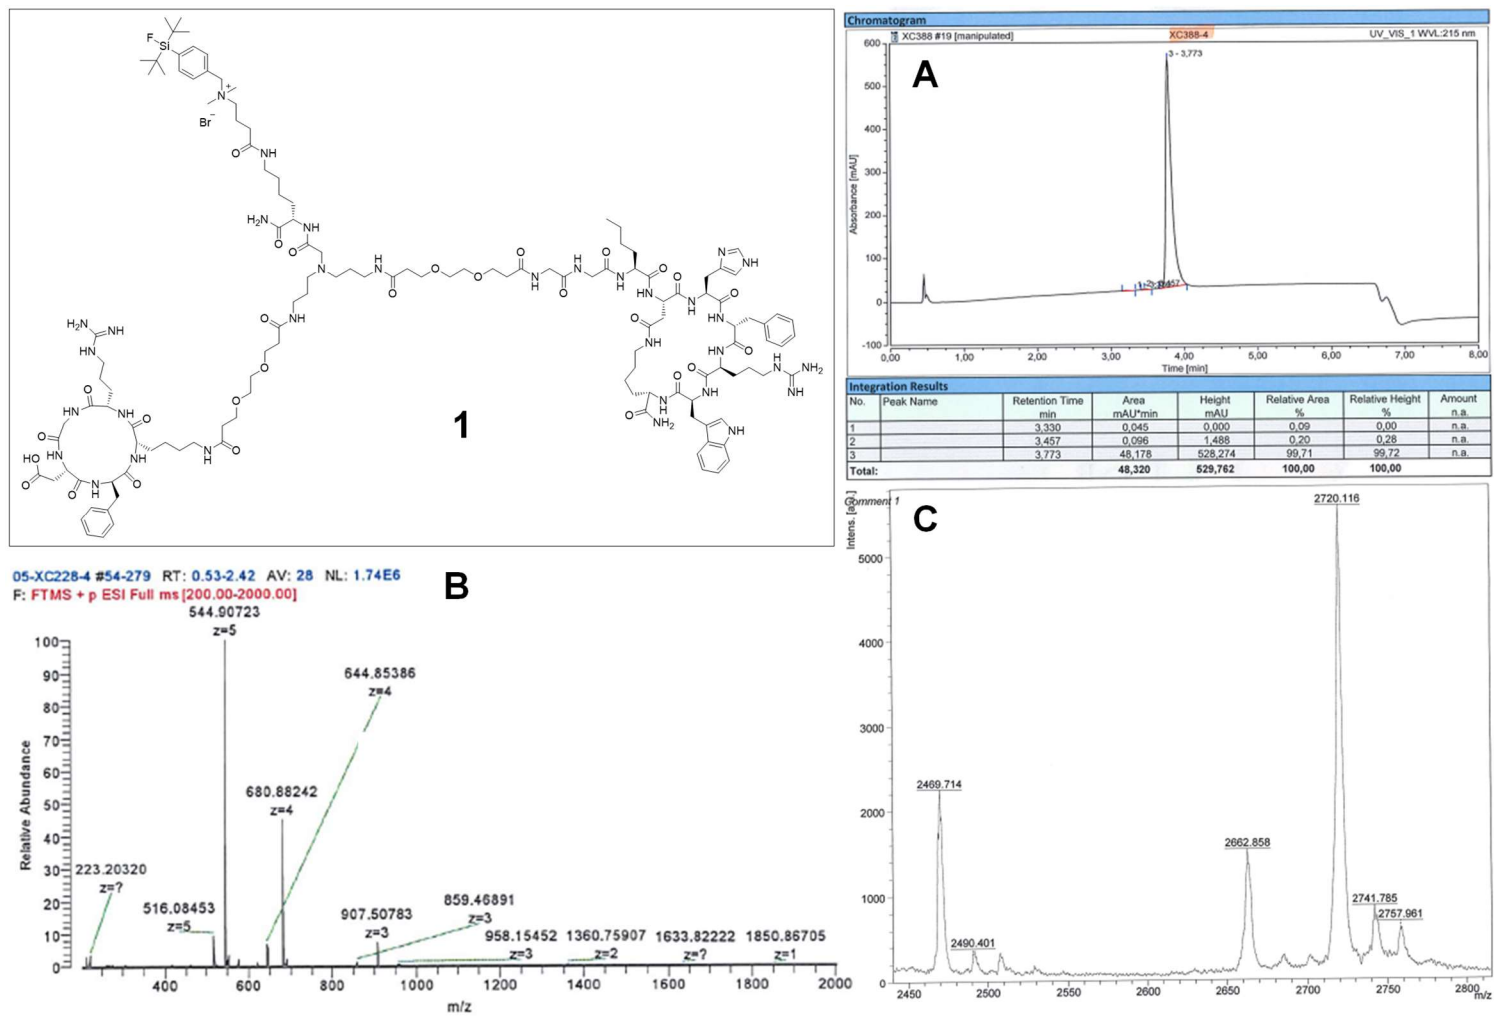

Figure S54. HPLC chromatogram (**A**) and mass spectra (**B**: ESI, **C**: MALDI) of SiFAlin-APG-PEG<sub>1</sub>-c(RGDfK)/GG-Nle-c(DHfRWK) (**1**).

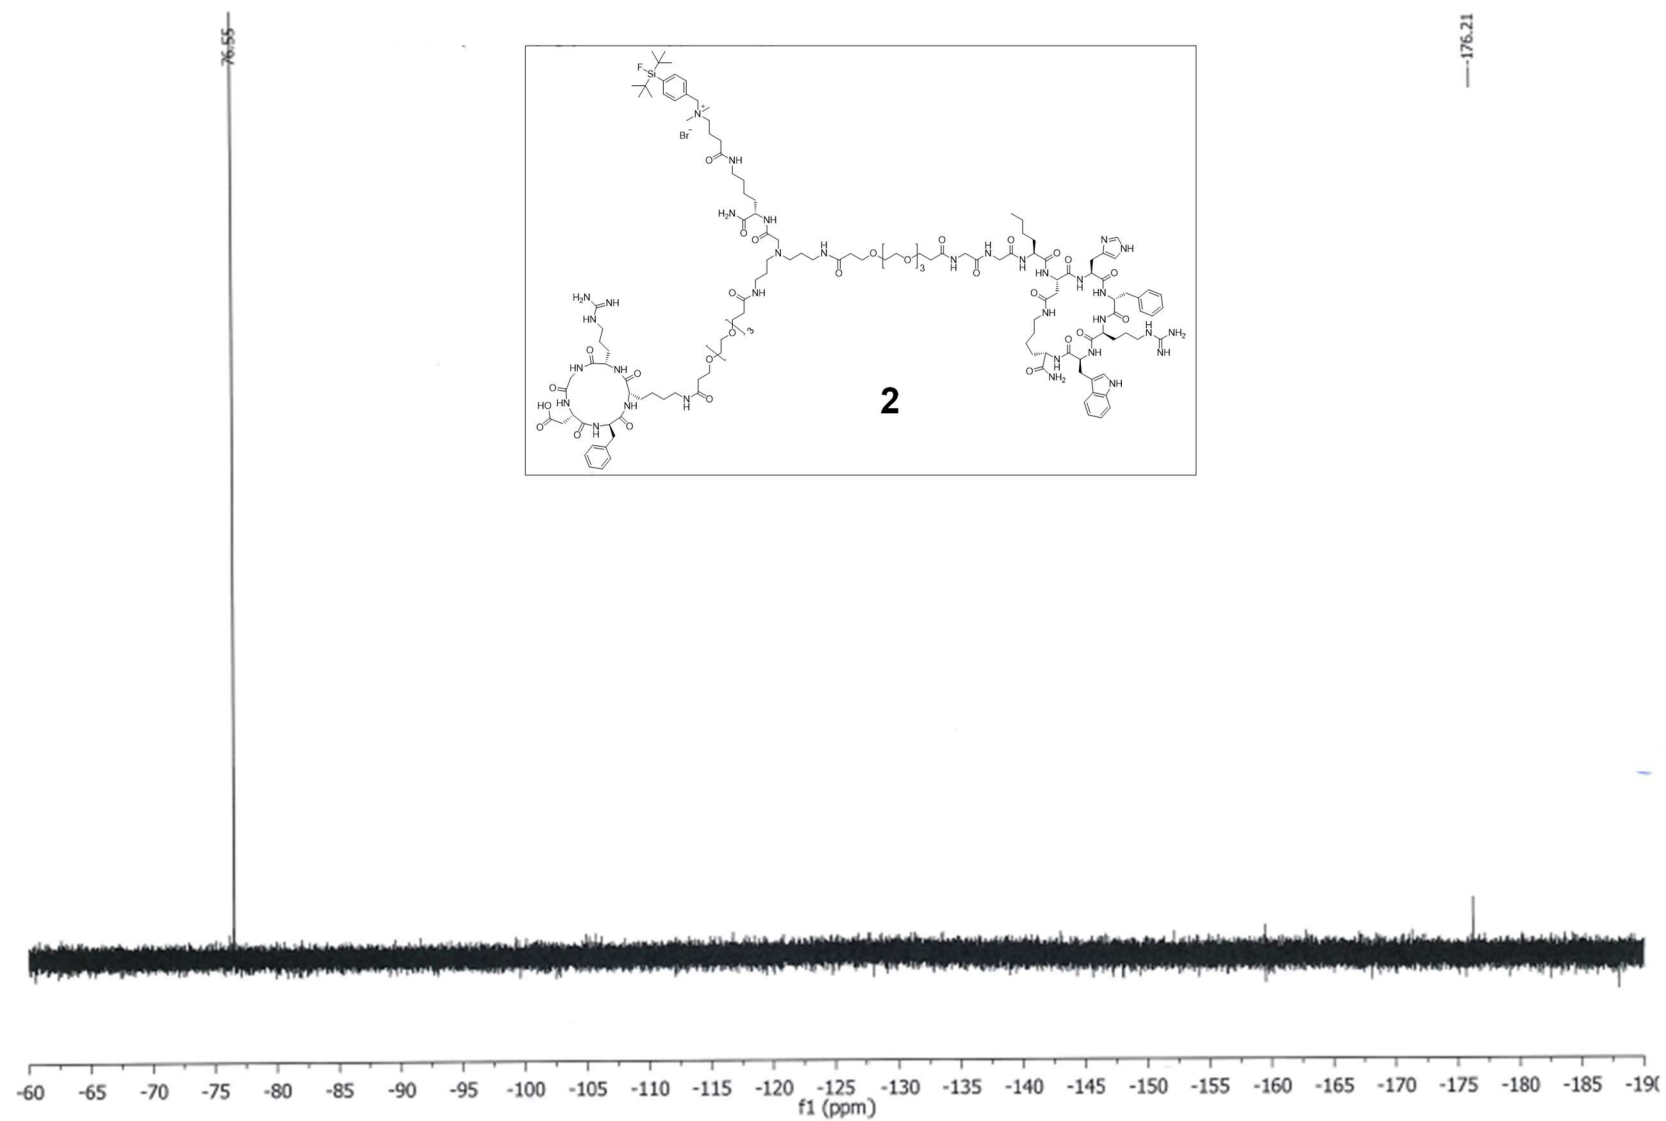

Figure S55.  $^{19}\text{F}$  NMR spectrum of SiFA/In-APG-PEG<sub>3</sub>-c(RGDfK)/GG-Nle-c(DHfRWK) (**2**).

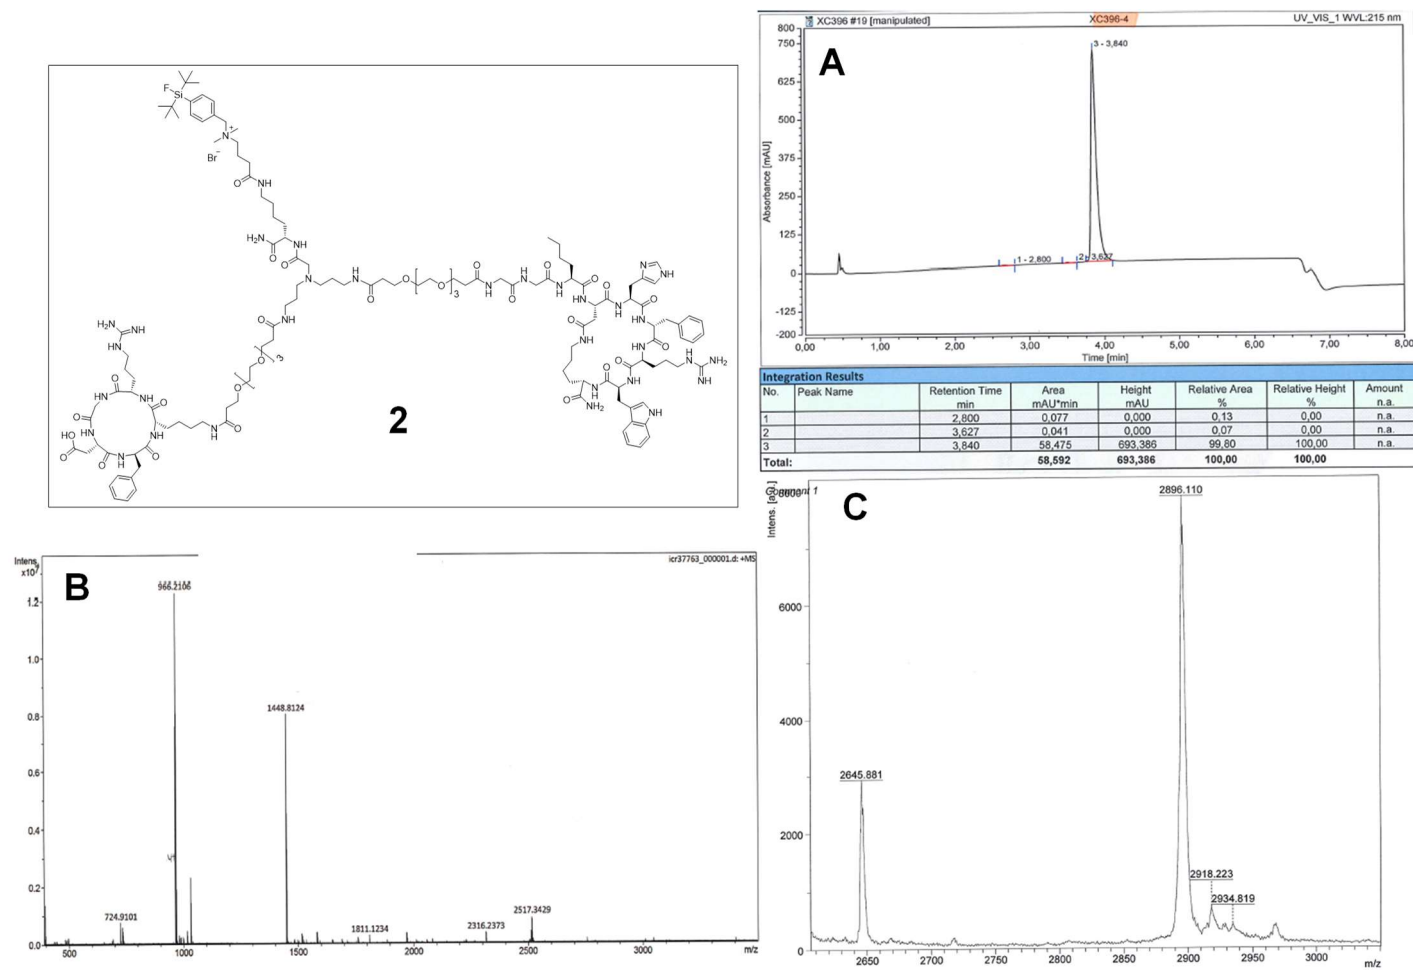

Figure S56. HPLC chromatogram (**A**) and mass spectra (**B**: ESI, **C**: MALDI) of SiFA/in-APG-PEG<sub>3</sub>-c(RGDfK)/GG-Nle-c(DHfRWK) (**2**).

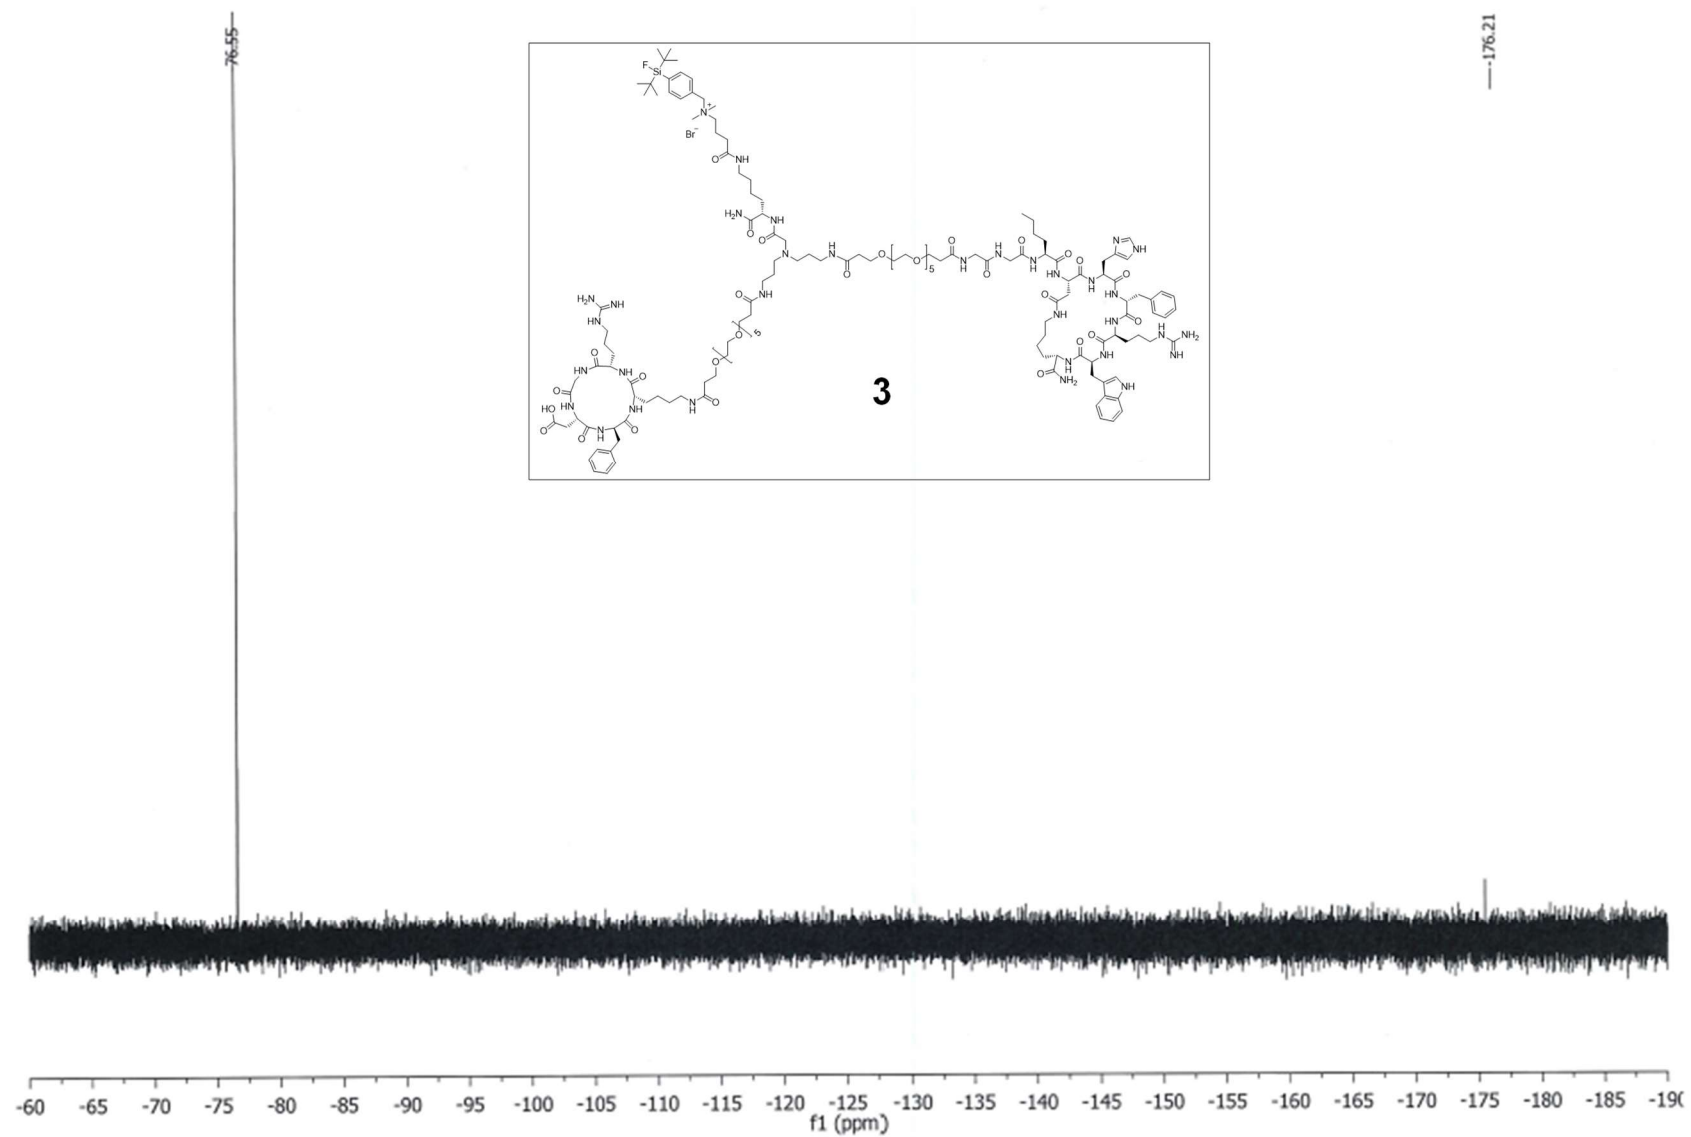

Figure S57.  $^{19}\text{F}$  NMR spectrum of SiFAIn-APG-PEG<sub>5</sub>-c(RGDfK)/GG-Nle-c(DHfRWK) (**3**).

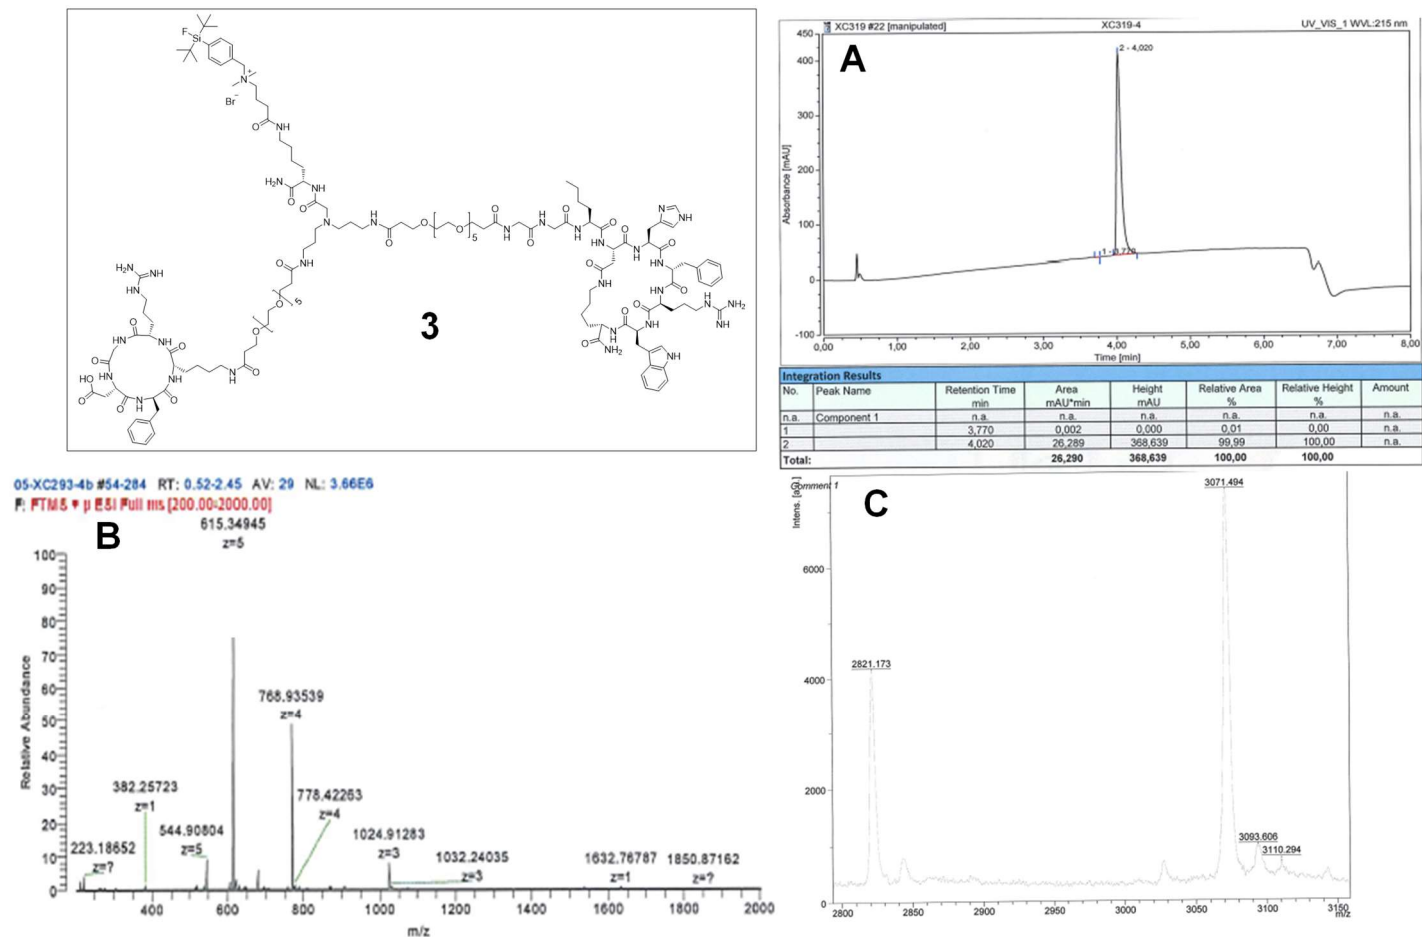

Figure S58. HPLC chromatogram (**A**) and mass spectra (**B**: ESI, **C**: MALDI) of SiFAlin-APG-PEG<sub>5</sub>-c(RGDfK)/GG-Nle-c(DHfRWK) (**3**).

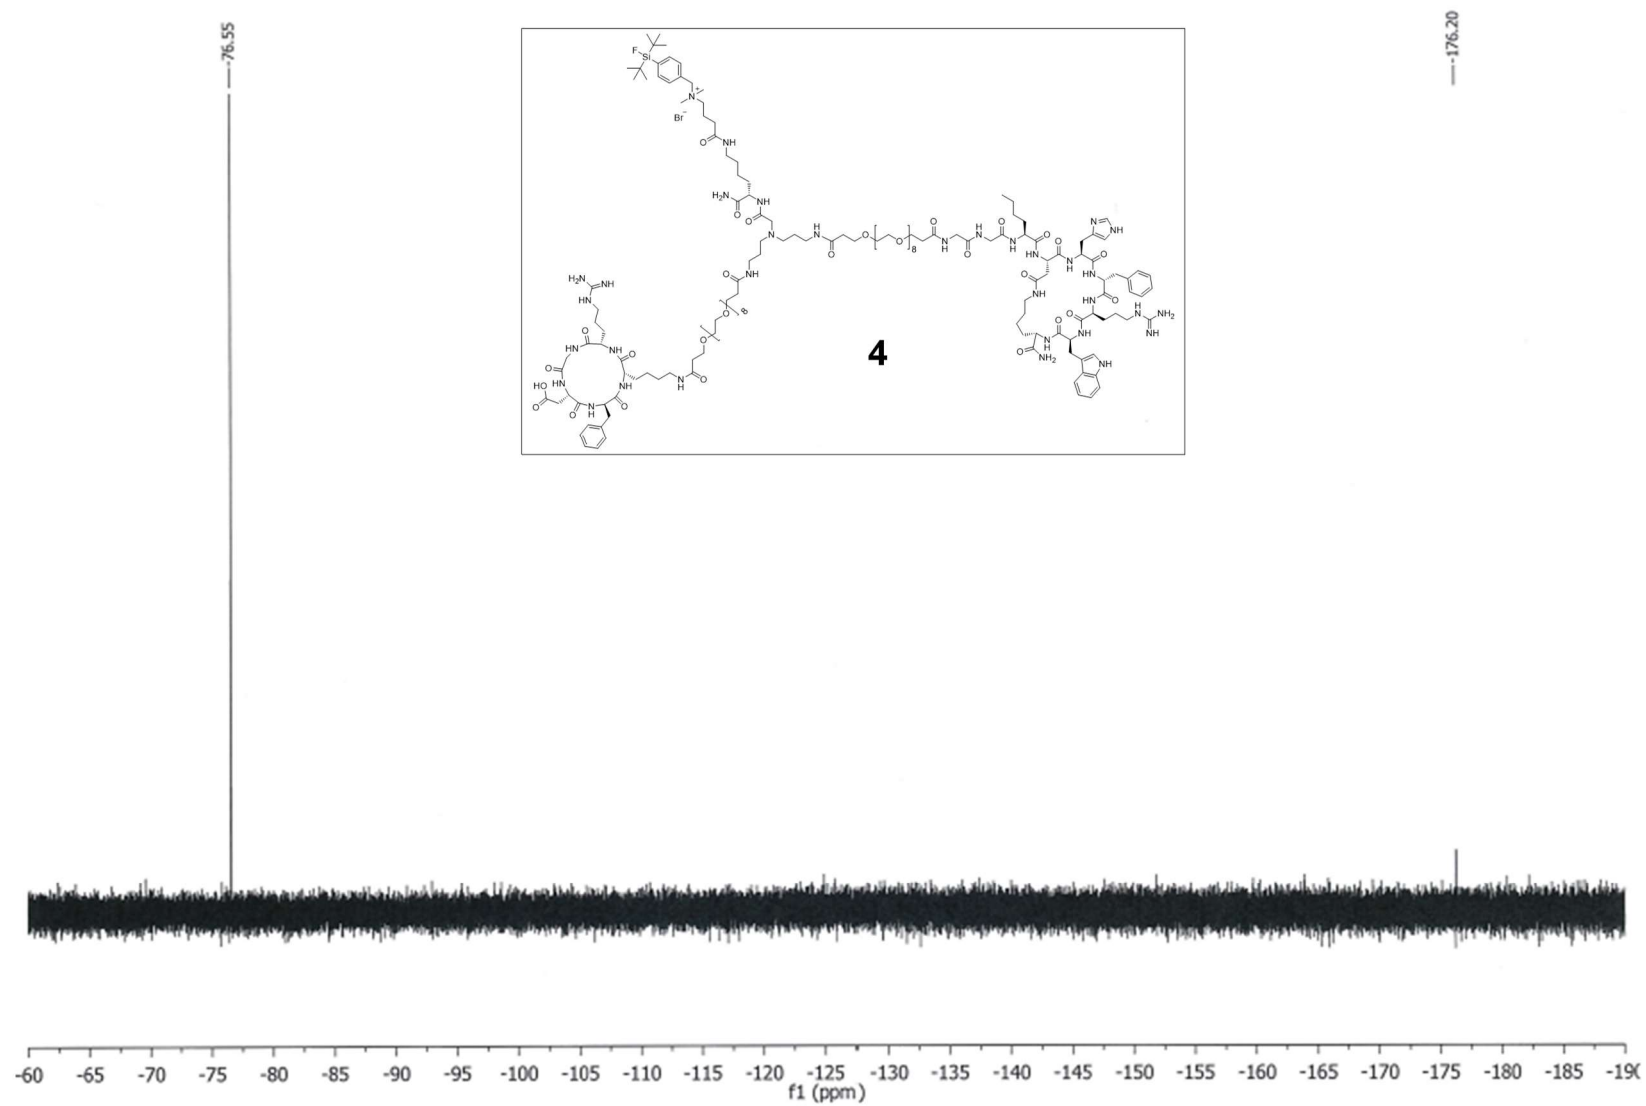

Figure S59.  $^{19}\text{F}$  NMR spectrum of SiFAIin-APG-PEG<sub>8</sub>-c(RGDfK)/GG-Nle-c(DHfRWK) (**4**).



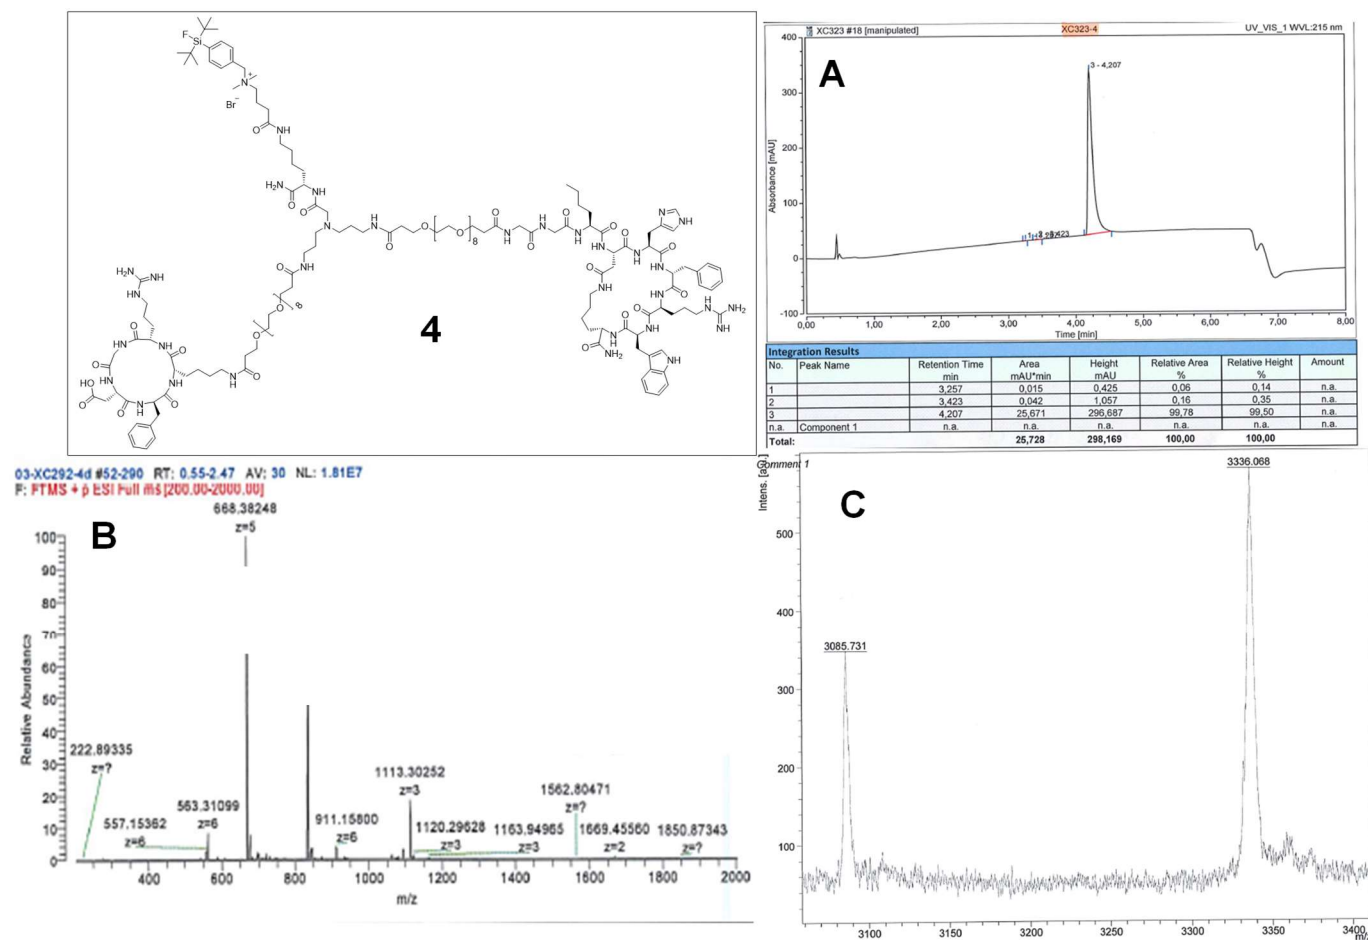

Figure S60. HPLC chromatogram (**A**) and mass spectra (**B**: ESI, **C**: MALDI) of SiFAlin-APG-PEG<sub>8</sub>-c(RGDfK)/GG-Nle-c(DHfRWK) (**4**).

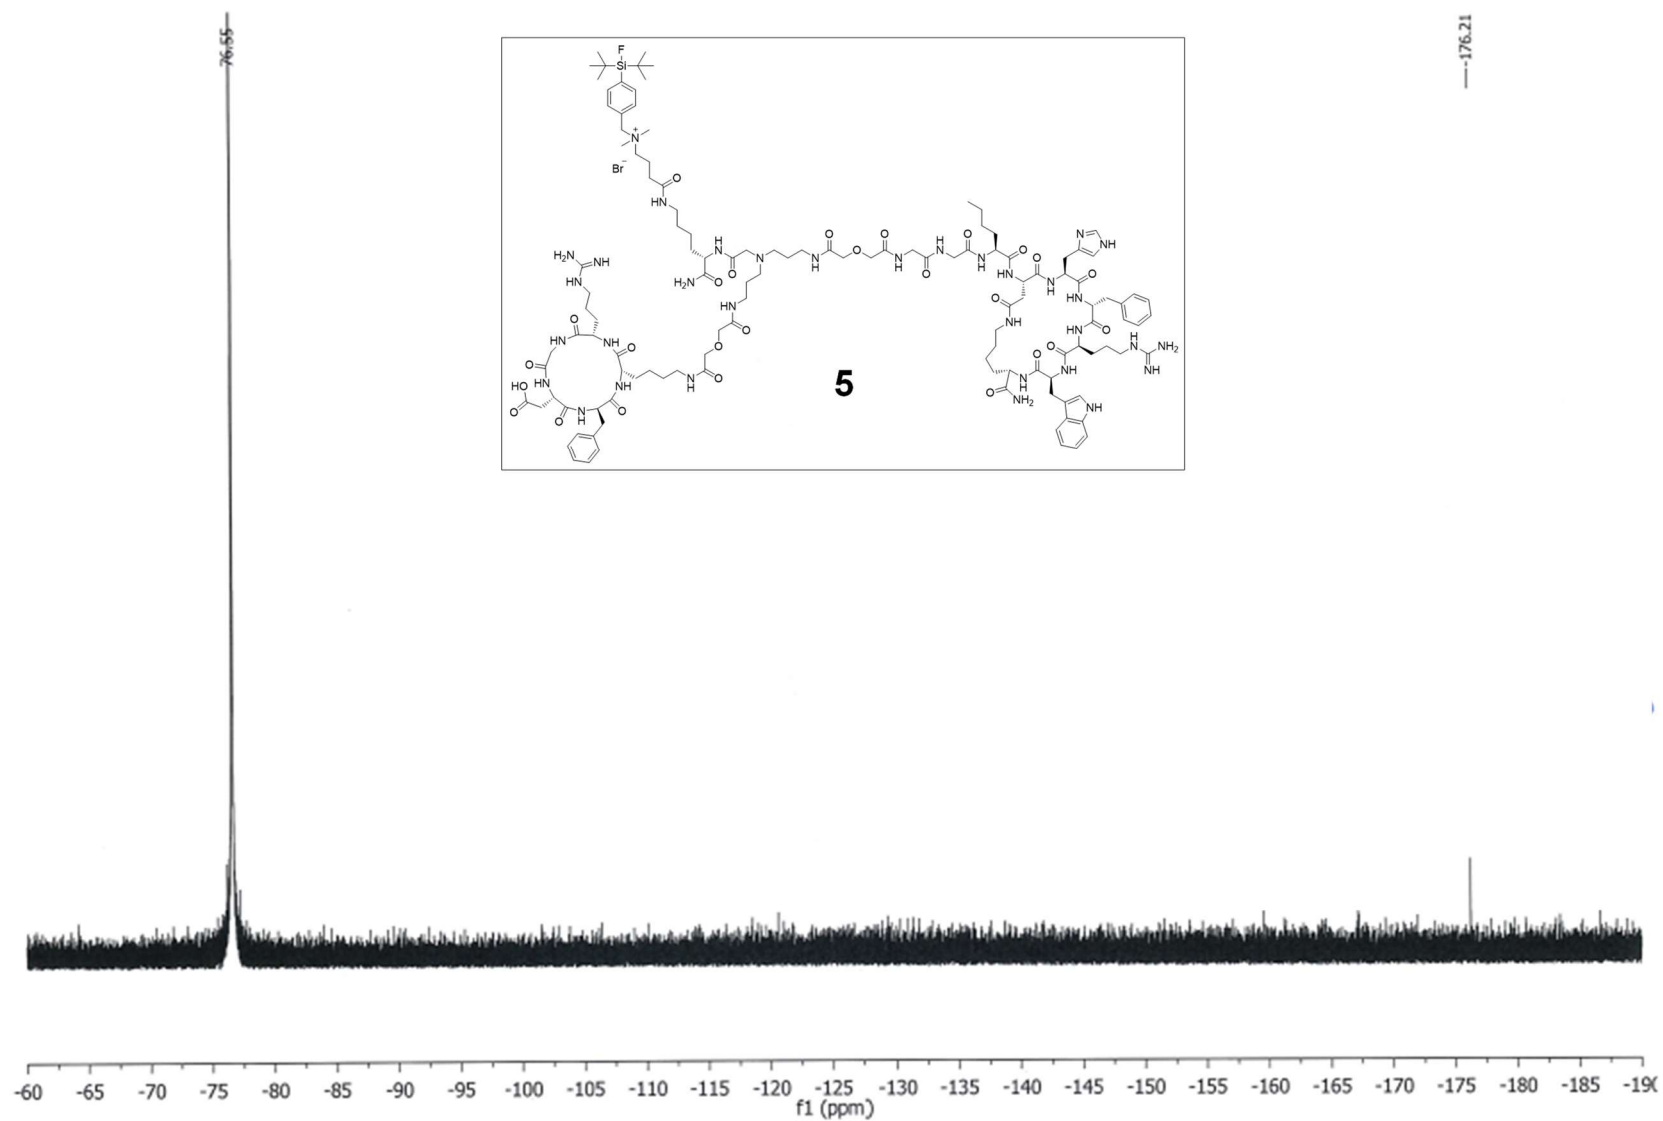

Figure S61.  $^{19}\text{F}$  NMR spectrum of SiFA/*in*-APG-DIG-c(RGDfK)/GG-Nle-c(DHfRWK) (**5**).

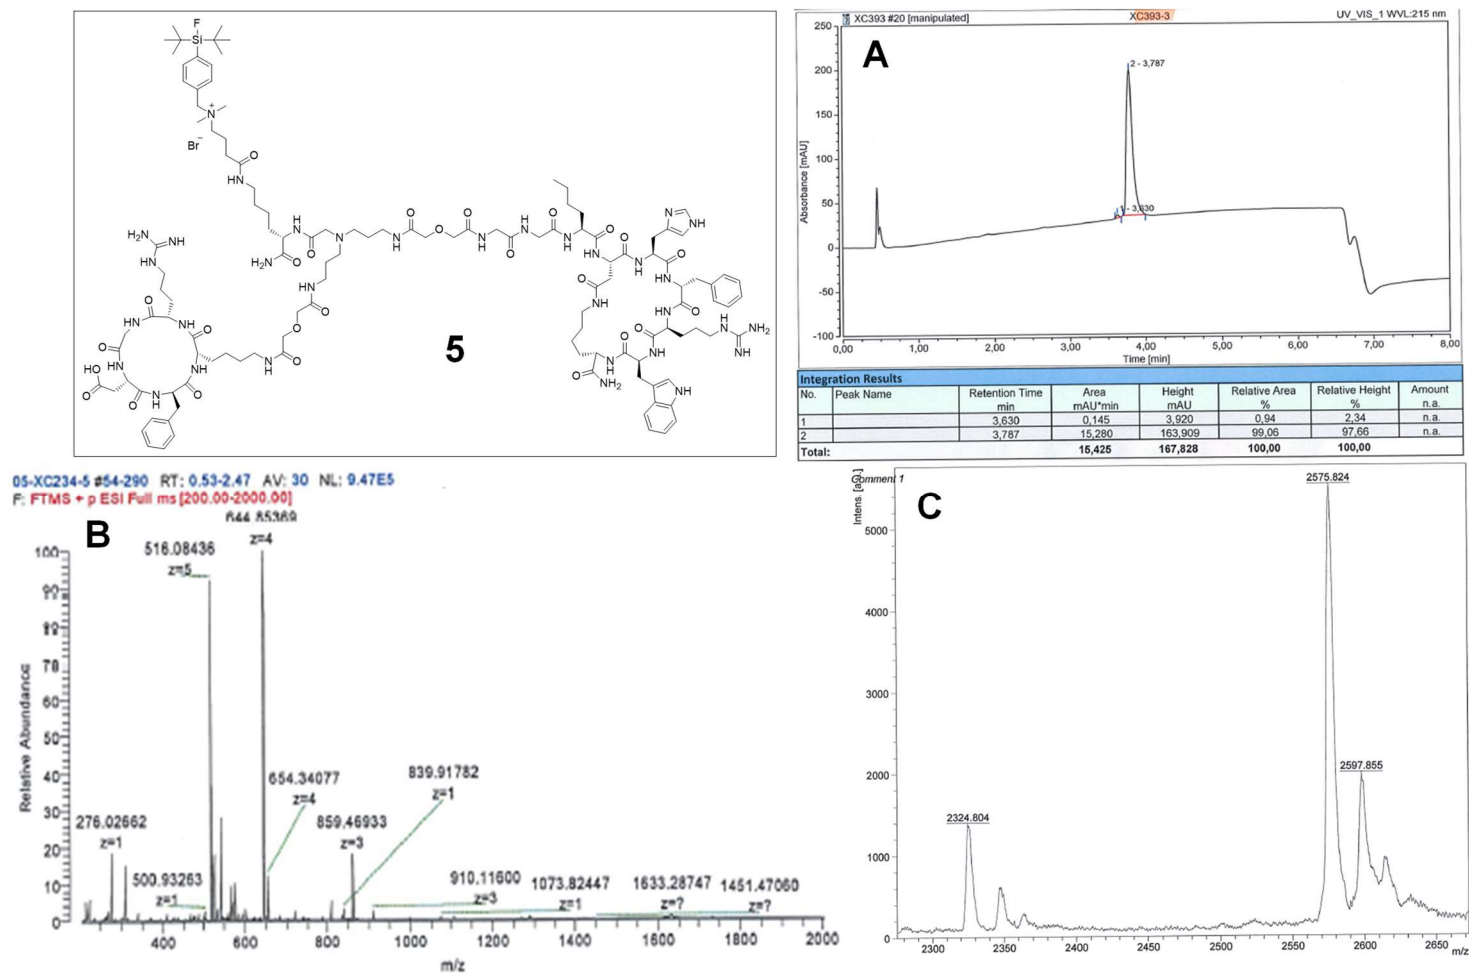

Figure S62. HPLC chromatogram (**A**) and mass spectra (**B**: ESI, **C**: MALDI) of SiFAlin-APG-DIG-c(RGDfK)/GG-Nle-c(DHfRWK) (**5**).

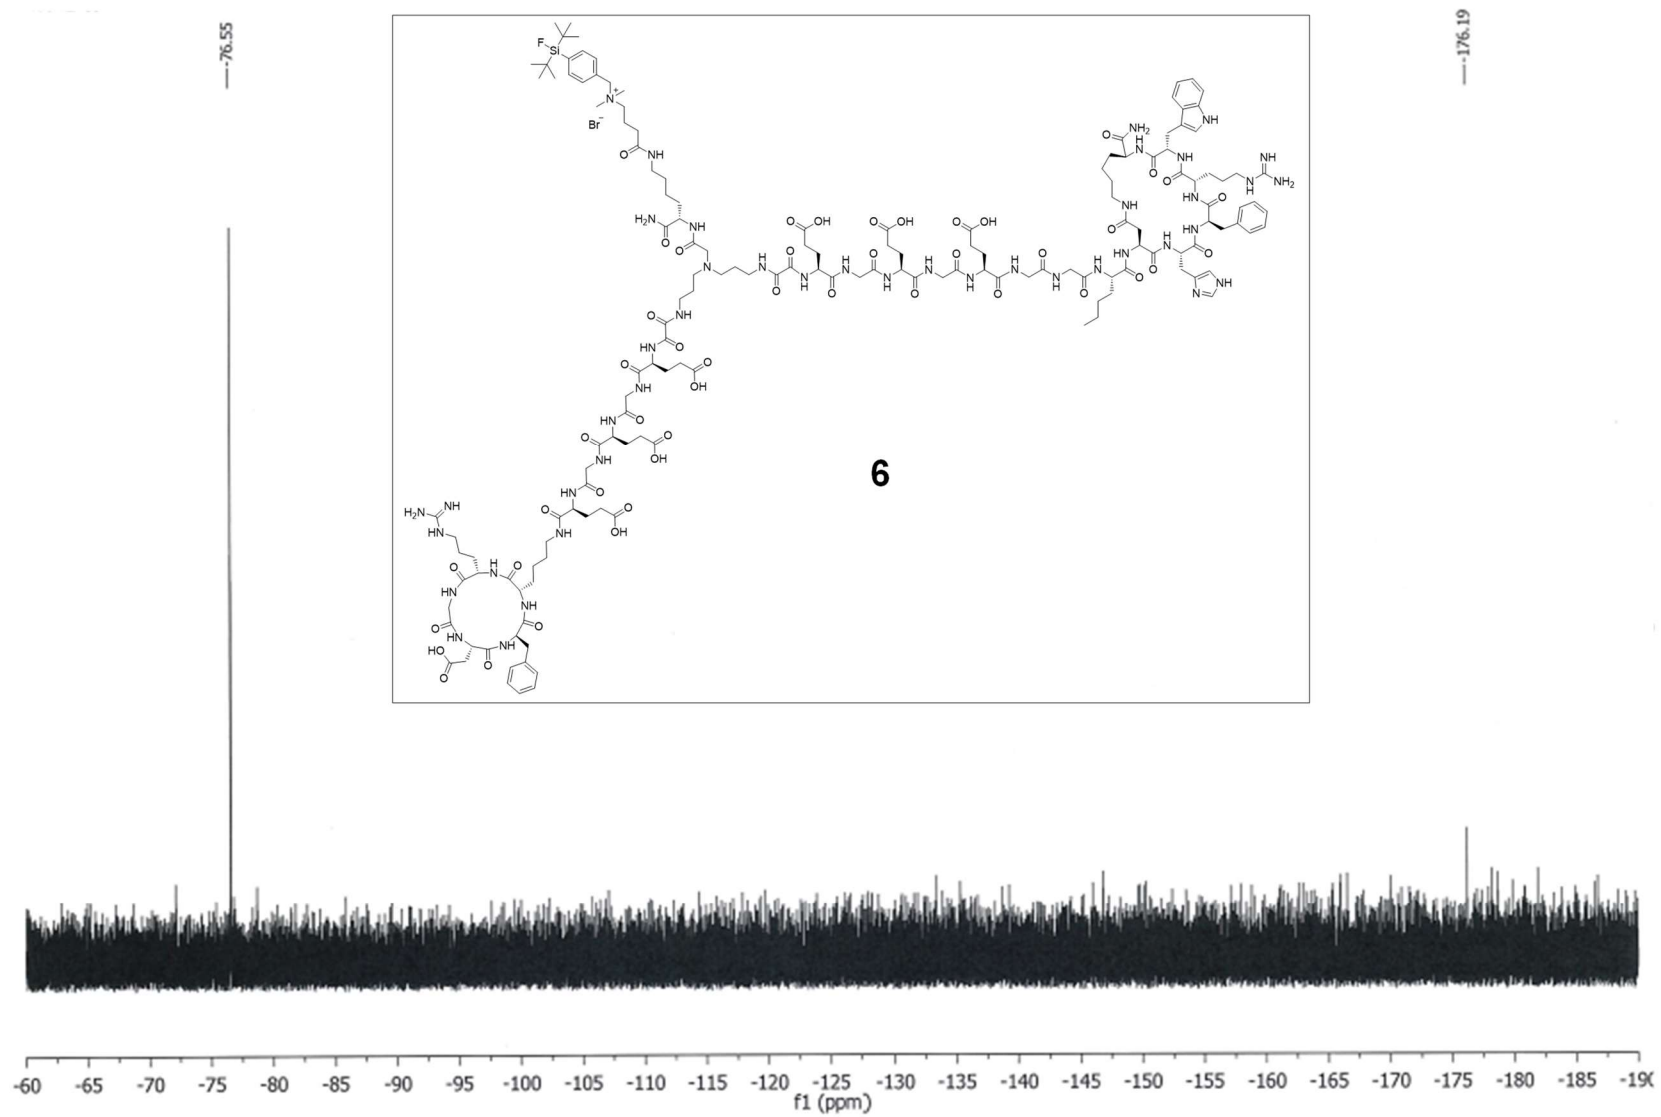

Figure S63.  $^{19}\text{F}$  NMR spectrum of SiFAlin-APG-Ox-EGEGE-c(RGDfK)/GG-Nle-c(DHfRWK) (**6**).

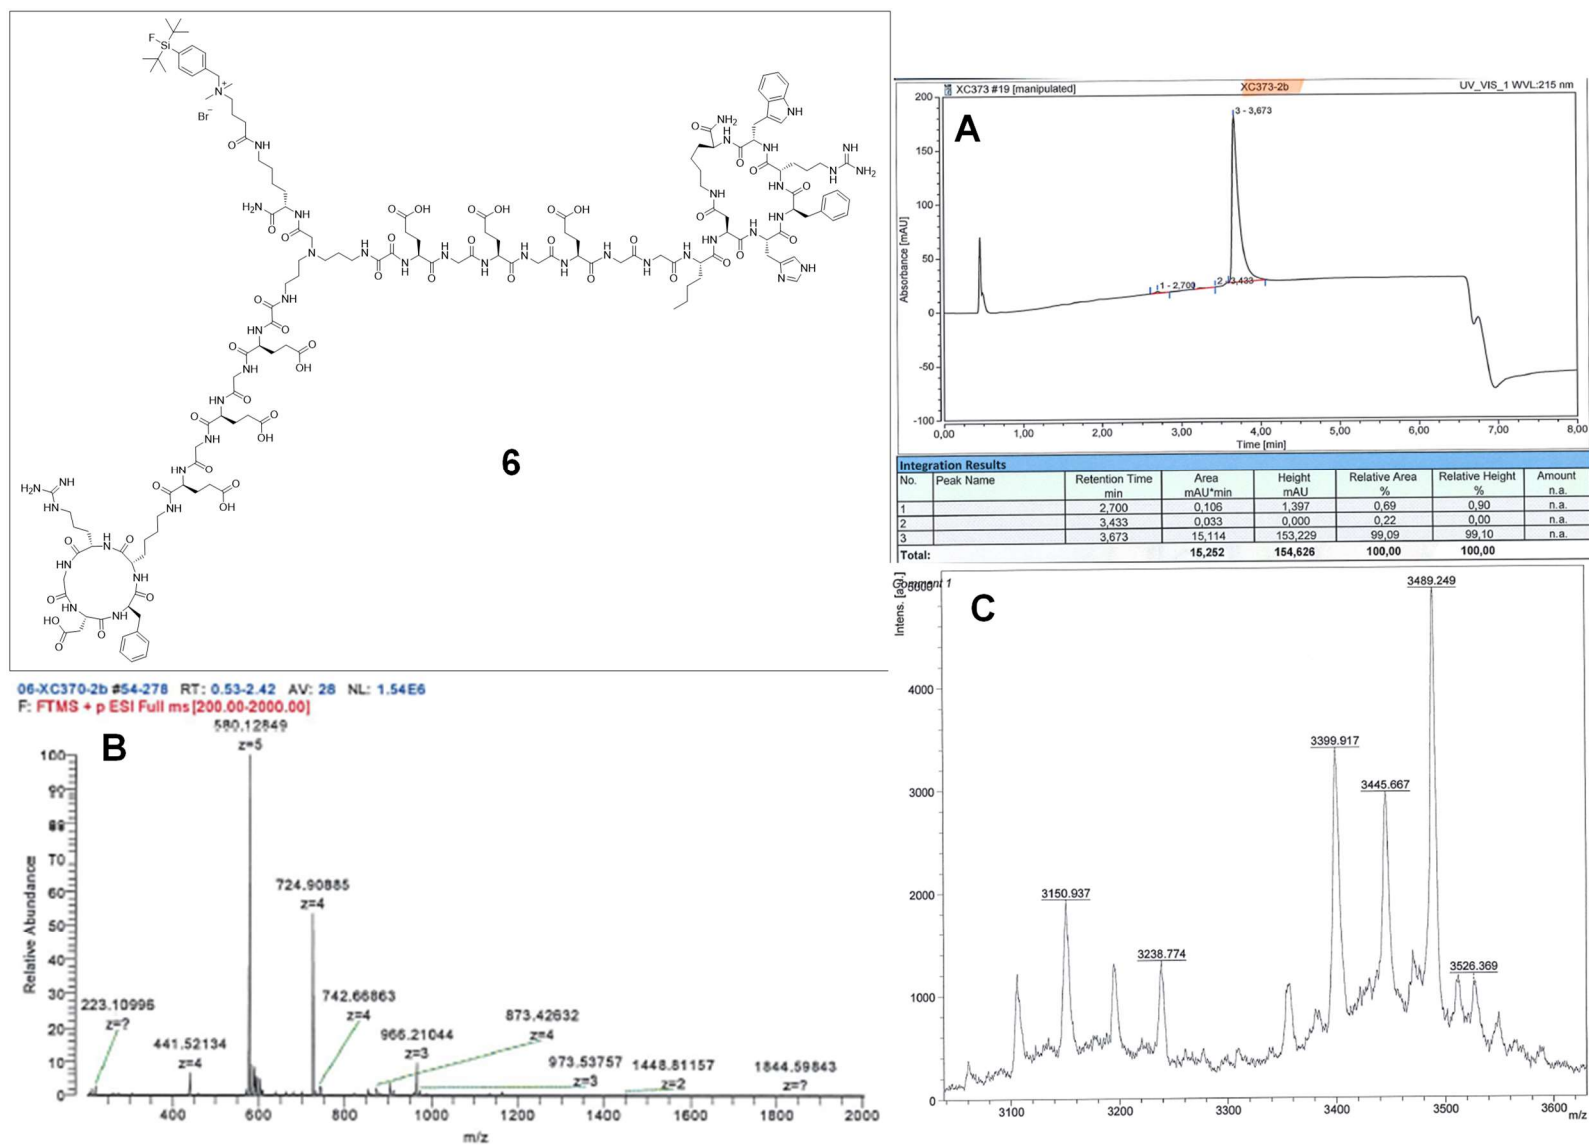

Figure S64. HPLC chromatogram (**A**) and mass spectra (**B**: ESI, **C**: MALDI) of SiFAlin-APG-Ox-EGEGE-c(RGDfK)/GG-Nle-c(DHfRWK) (**6**).

#### 4. Mass data, HPLC chromatograms and mass spectra of peptidic side products a–z

*HO-PEG<sub>1</sub>-c(RGDfK)* (**a**): MS (MALDI)  $m/z$  calcd for  $C_{35}H_{54}N_9O_{12}$   $[M+H]^+$  792.39, found: 792.16; HRMS (ESI)  $m/z$  calcd for  $C_{35}H_{54}N_9O_{12}$   $[M+H]^+$  792.3886, found 792.3890.

*c(RGDfK)-PEG<sub>1</sub>-c(RGDfK)* (**b**): MS (MALDI)  $m/z$  calcd for  $C_{62}H_{92}N_{18}O_{18}$   $[M]^+$  1376.68, found: 1376.51; HRMS (ESI)  $m/z$  calcd for  $C_{62}H_{94}N_{18}O_{18}$   $[M+2H]^{2+}$  689.3491, found 689.3506; calcd for  $C_{62}H_{93}N_{18}O_{18}$   $[M+H]^+$  1377.6910, found 1377.6972.

*HO-PEG<sub>3</sub>-c(RGDfK)* (**c**): MS (MALDI)  $m/z$  calcd for  $C_{39}H_{61}N_9O_{14}$   $[M]^+$  879.43, found: 879.54; HRMS (ESI)  $m/z$  calcd for  $C_{39}H_{62}N_9O_{14}$   $[M+H]^+$  880.4411, found 880.4407.

*c(RGDfK)-PEG<sub>3</sub>-c(RGDfK)* (**d**): MS (MALDI)  $m/z$  calcd for  $C_{66}H_{100}N_{18}O_{20}$   $[M]^+$  1464.74, found: 1464.78; HRMS (ESI)  $m/z$  calcd for  $C_{66}H_{101}N_{18}O_{20}$   $[M+H]^+$  1465.7434, found 1465.7475.

*HO-PEG<sub>5</sub>-c(RGDfK)* (**e**): MS (MALDI)  $m/z$  calcd for  $C_{43}H_{70}N_9O_{16}$   $[M+H]^+$  968.49, found: 968.19; HRMS (ESI)  $m/z$  calcd for  $C_{43}H_{70}N_9O_{16}$   $[M+H]^+$  968.4935, found 968.4941.

*c(RGDfK)-PEG<sub>5</sub>-c(RGDfK)* (**f**): MS (MALDI)  $m/z$  calcd for  $C_{70}H_{109}N_{18}O_{22}$   $[M]^+$  1553.80, found: 1553.12; HRMS (ESI)  $m/z$  calcd for  $C_{70}H_{110}N_{18}O_{22}$   $[M+2H]^{2+}$  777.4016, found 777.4054; calcd for  $C_{70}H_{109}N_{18}O_{22}$   $[M+H]^+$  1553.7958, found 1553.8101.

*HO-PEG<sub>8</sub>-c(RGDfK)* (**g**): MS (MALDI)  $m/z$  calcd for  $C_{49}H_{82}N_9O_{19}$   $[M+H]^+$  1100.57, found: 1100.24; HRMS (ESI)  $m/z$  calcd for  $C_{49}H_{82}N_9O_{19}$   $[M+H]^+$  1100.5721, found 1100.5722.

*c(RGDfK)-PEG<sub>8</sub>-c(RGDfK)* (**h**): MS (MALDI)  $m/z$  calcd for  $C_{76}H_{121}N_{18}O_{25}$   $[M+H]^+$  1685.87, found: 1685.15; HRMS (ESI)  $m/z$  calcd for  $C_{76}H_{121}N_{18}NaO_{25}$   $[M+H+Na]^{2+}$  854.4318, found 854.4318; calcd for  $C_{76}H_{121}N_{18}O_{25}$   $[M+H]^+$  1685.8745, found 1685.8771.

*HO-PEG<sub>1</sub>-GG-Nle-c(DHfRWK)* (**i**): MS (MALDI)  $m/z$  calcd for  $C_{60}H_{86}N_{17}O_{15}$   $[M+H]^+$  1284.65, found: 1284.15; HRMS (ESI)  $m/z$  calcd for  $C_{60}H_{87}N_{17}O_{15}$   $[M+H]^{2+}$  642.8278, found 642.8286; calcd for  $C_{60}H_{86}N_{17}O_{15}$   $[M+H]^+$ : 1284.6517, found 1284.6534.

*c(DHfRWK)-Nle-GG-PEG<sub>1</sub>-GG-Nle-c(DHfRWK)* (**j**): MS (MALDI)  $m/z$  calcd for  $C_{112}H_{157}N_{34}O_{24}$   $[M+H]^+$  2362.21, found: 2362.06; HRMS (ESI)  $m/z$  calcd for  $C_{112}H_{159}N_{34}O_{24}$   $[M+3H]^{3+}$  788.4095, found 788.4087; calcd for  $C_{112}H_{158}N_{34}O_{24}$   $[M+2H]^{2+}$  1182.1105, found 1182.1107.

*HO-PEG<sub>3</sub>-GG-Nle-c(DHfRWK)* (**k**): MS (MALDI)  $m/z$  calcd for  $C_{64}H_{94}N_{17}O_{17}$   $[M+H]^+$  1372.70, found: 1372.49; HRMS (ESI)  $m/z$  calcd for  $C_{64}H_{94}N_{17}O_{17}$   $[M+H]^{2+}$  686.3501, found 686.3624; calcd for  $C_{64}H_{94}N_{17}O_{17}$   $[M+H]^+$  1372.7008, found 1372.7041.

*c(DHfRWK)-Nle-GG-PEG<sub>3</sub>-GG-Nle-c(DHfRWK)* (**l**): MS (MALDI)  $m/z$  calcd for  $C_{116}H_{165}N_{34}O_{26}$   $[M+H]^+$  2450.26, found: 2450.78; HRMS (ESI)  $m/z$  calcd for  $C_{116}H_{166}N_{34}O_{26}$   $[M+2H]^{2+}$  1226.1368, found 1226.1374.

*HO-PEG<sub>5</sub>-GG-Nle-c(DHfRWK)* (**m**): MS (MALDI)  $m/z$  calcd for  $C_{68}H_{101}N_{17}O_{19}$   $[M]^+$  1459.75, found: 1459.03; HRMS (ESI)  $m/z$  calcd for  $C_{68}H_{102}N_{17}O_{19}$   $[M+H]^+$  1460.7532, found 1460.7528.

*c(DHfRWK)-Nle-GG-PEG<sub>5</sub>-GG-Nle-c(DHfRWK)* (**n**): MS (MALDI)  $m/z$  calcd for  $C_{120}H_{173}N_{34}O_{28}$   $[M+H]^+$  2538.32, found: 2538.09; HRMS (ESI)  $m/z$  calcd for  $C_{120}H_{175}N_{34}O_{28}$   $[M+3H]^{3+}$  847.1111, found 847.1110; calcd for  $C_{120}H_{174}N_{34}O_{28}$   $[M+2H]^{2+}$  1270.1630, found 1270.1641.

*HO-PEG<sub>8</sub>-GG-Nle-c(DHfRWK)* (**o**): MS (MALDI)  $m/z$  calcd for  $C_{74}H_{114}N_{17}O_{22}$   $[M+H]^+$  1592.83, found: 1592.11; HRMS (ESI)  $m/z$  calcd for  $C_{74}H_{114}N_{17}O_{22}$   $[M+H]^+$  1592.8319, found 1592.8321.

*c(DHfRWK)-Nle-GG-PEG<sub>8</sub>-GG-Nle-c(DHfRWK)* (**p**): MS (MALDI) *m/z* calcd for C<sub>126</sub>H<sub>185</sub>N<sub>34</sub>O<sub>31</sub> [*M*+H]<sup>+</sup> 2670.39, found: 2670.33; HRMS (ESI) *m/z* calcd for C<sub>126</sub>H<sub>188</sub>N<sub>34</sub>O<sub>31</sub> [*M*+4H]<sup>4+</sup> 668.6048, found 668.6048; calcd for C<sub>126</sub>H<sub>187</sub>N<sub>34</sub>O<sub>31</sub> [*M*+3H]<sup>3+</sup> 891.1373, found 891.1372; calcd for C<sub>126</sub>H<sub>186</sub>N<sub>34</sub>O<sub>31</sub> [*M*+2H]<sup>2+</sup> 1336.2023, found 1336.2039.

*c(RGDfK)-DIG-c(RGDfK)* (**q**): MS (MALDI) *m/z* calcd for C<sub>58</sub>H<sub>85</sub>N<sub>18</sub>O<sub>17</sub> [*M*+H]<sup>+</sup> 1305.63, found: 1305.49; HRMS (ESI) *m/z* calcd for C<sub>58</sub>H<sub>86</sub>N<sub>18</sub>O<sub>17</sub> [*M*+2H]<sup>2+</sup> 653.3204, found 653.3207; calcd for C<sub>58</sub>H<sub>85</sub>N<sub>18</sub>O<sub>17</sub> [*M*+H]<sup>+</sup> 1305.6335, found 1305.6356.

*c(RGDfK)-EGEGE-Ox-EGEGE-c(RGDfK)* (**r**): MS (MALDI) *m/z* calcd for C<sub>58</sub>H<sub>85</sub>N<sub>18</sub>O<sub>17</sub> [*M*+H]<sup>+</sup> 2263.95, found: 2263.82; HRMS (ESI) *m/z* calcd for C<sub>94</sub>H<sub>136</sub>N<sub>28</sub>O<sub>38</sub> [*M*+2H]<sup>2+</sup> 1132.9796, found 1132.9793.

*c(DHfRWK)-Nle-GG-DIG-GG-Nle-c(DHfRWK)* (**s**): MS (MALDI) *m/z* calcd for C<sub>108</sub>H<sub>148</sub>N<sub>34</sub>O<sub>23</sub> [*M*]<sup>+</sup> 2289.15, found: 2289.51; HRMS (ESI) *m/z* calcd for C<sub>108</sub>H<sub>151</sub>N<sub>34</sub>O<sub>23</sub> [*M*+3H]<sup>3+</sup> 764.3903, found 764.3896; calcd for C<sub>108</sub>H<sub>150</sub>N<sub>34</sub>O<sub>23</sub> [*M*+2H]<sup>2+</sup> 1146.0818, found 1146.0820.

*c(DHfRWK)-Nle-GG-EGEGE-Ox-EGEGE-GG-Nle-c(DHfRWK)* (**t**): MS (MALDI) *m/z* calcd for C<sub>144</sub>H<sub>199</sub>N<sub>44</sub>O<sub>44</sub> [*M*+H]<sup>+</sup> 3248.47, found: 3248.29; HRMS (ESI) *m/z* calcd for C<sub>144</sub>H<sub>201</sub>N<sub>44</sub>O<sub>44</sub> [*M*+3H]<sup>3+</sup> 1083.8287, found 1083.8283; calcd for C<sub>144</sub>H<sub>200</sub>N<sub>44</sub>O<sub>44</sub> [*M*+2H]<sup>2+</sup> 1625.2394, found 1625.2388.

*SiFalin-APG-[PEG<sub>1</sub>-c(RGDfK)]<sub>2</sub>* (**u**): MS (MALDI) *m/z* calcd for C<sub>105</sub>H<sub>169</sub>FN<sub>25</sub>O<sub>25</sub>Si [*M*]<sup>+</sup> 2227.25, found: 2227.78; HRMS (ESI) *m/z* calcd for C<sub>105</sub>H<sub>171</sub>FN<sub>25</sub>O<sub>25</sub>Si [*M*+2H]<sup>3+</sup> 743.4216, found 743.4216; calcd for C<sub>105</sub>H<sub>170</sub>FN<sub>25</sub>O<sub>25</sub>Si [*M*+H]<sup>2+</sup> 1114.6288, found 1114.6282.

*SiFalin-APG-[PEG<sub>3</sub>-c(RGDfK)]<sub>2</sub>* (**v**): MS (MALDI) *m/z* calcd for C<sub>113</sub>H<sub>186</sub>FN<sub>25</sub>O<sub>29</sub>Si [*M*+H]<sup>+</sup> 2404.36, found: 2404.59; HRMS (ESI) *m/z* calcd for C<sub>113</sub>H<sub>187</sub>FN<sub>25</sub>O<sub>29</sub>Si [*M*+2H]<sup>3+</sup> 802.1232, found 802.1231; calcd for C<sub>113</sub>H<sub>186</sub>FN<sub>25</sub>O<sub>29</sub>Si [*M*+H]<sup>2+</sup> 1202.6812, found 1202.6806.

*SiFalin-APG-[PEG<sub>5</sub>-c(RGDfK)]<sub>2</sub>* (**w**): MS (MALDI) *m/z* calcd for C<sub>121</sub>H<sub>202</sub>FN<sub>25</sub>O<sub>33</sub>Si [*M*+H]<sup>+</sup> 2580.46, found: 2580.38; HRMS (ESI) *m/z* calcd for C<sub>121</sub>H<sub>204</sub>FN<sub>25</sub>O<sub>33</sub>Si [*M*+3H]<sup>4+</sup> 645.8705, found 645.8709; calcd for C<sub>121</sub>H<sub>203</sub>FN<sub>25</sub>O<sub>33</sub>Si [*M*+2H]<sup>3+</sup> 860.8249, found 860.8249; calcd for C<sub>121</sub>H<sub>202</sub>FN<sub>25</sub>O<sub>33</sub>Si [*M*+H]<sup>2+</sup> 1290.7336, found 1290.7334.

*SiFalin-APG-[PEG<sub>8</sub>-c(RGDfK)]<sub>2</sub>* (**x**): MS (MALDI) *m/z* calcd for C<sub>133</sub>H<sub>225</sub>FN<sub>25</sub>O<sub>39</sub>Si [*M*+H]<sup>+</sup> 2843.61, found: 2843.59; HRMS (ESI) *m/z* calcd for C<sub>133</sub>H<sub>228</sub>FN<sub>25</sub>O<sub>39</sub>Si [*M*+3H]<sup>4+</sup> 711.9098, found 711.9095; calcd for C<sub>133</sub>H<sub>227</sub>FN<sub>25</sub>O<sub>39</sub>Si [*M*+2H]<sup>3+</sup> 948.8773, found 948.8771; calcd for C<sub>133</sub>H<sub>226</sub>FN<sub>25</sub>O<sub>39</sub>Si [*M*+H]<sup>2+</sup> 1422.8123, found 1422.8132.

*SiFalin-APG-[DIG-c(RGDfK)]<sub>2</sub>* (**y**): MS (MALDI) *m/z* calcd for C<sub>97</sub>H<sub>153</sub>FN<sub>25</sub>O<sub>23</sub>Si [*M*]<sup>+</sup> 2083.13, found: 2083.43; HRMS (ESI) *m/z* calcd for C<sub>97</sub>H<sub>150</sub>FN<sub>25</sub>O<sub>23</sub>Si [*M*-3H]<sup>+</sup> 2081.1118, found 2081.4647.

*SiFalin-APG-[Ox-EGEGE-c(RGDfK)]<sub>2</sub>* (**z**): MS (MALDI) *m/z* calcd for C<sub>131</sub>H<sub>200</sub>FN<sub>35</sub>O<sub>43</sub>Si [*M*+H]<sup>+</sup> 2998.43, found: 2998.28; HRMS (ESI) *m/z* calcd for C<sub>123</sub>H<sub>179</sub>N<sub>35</sub>O<sub>43</sub> [*M*-C<sub>7</sub>H<sub>17</sub>FSi]<sup>+</sup> 1417.6459, found 1417.6307.

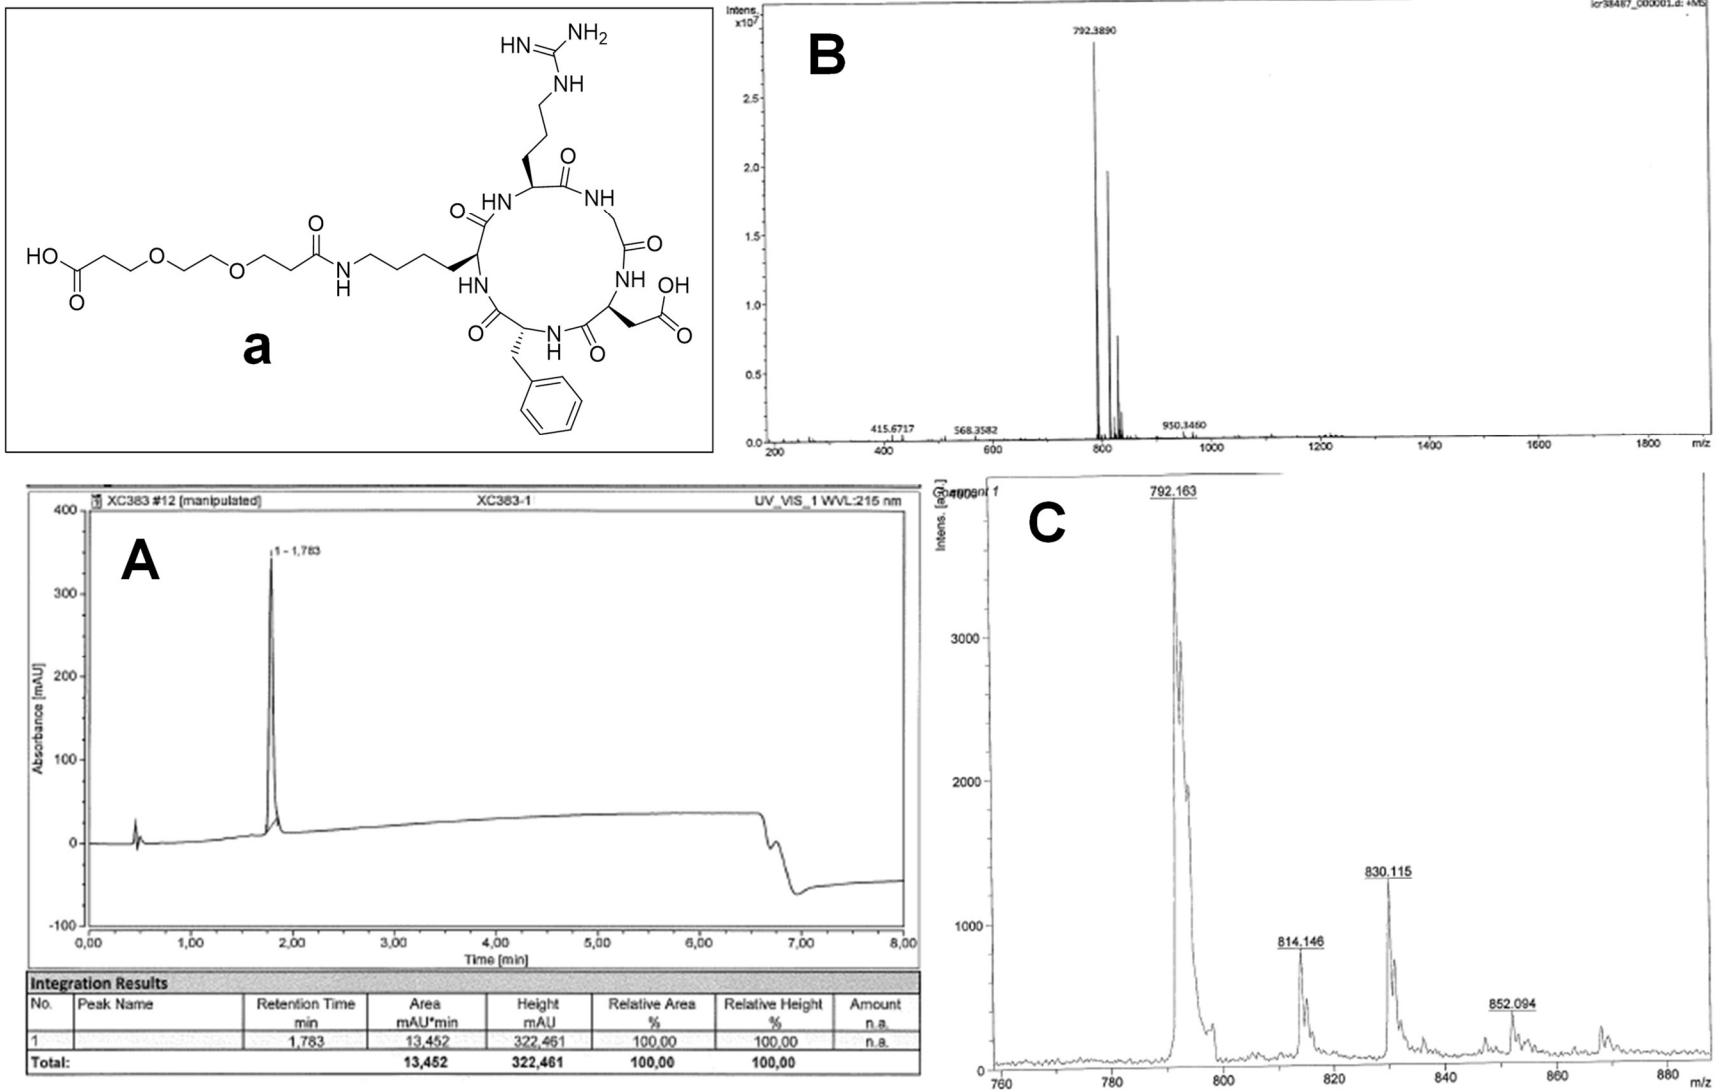

Figure S65. HPLC chromatogram (**A**) and mass spectra (**B**: ESI, **C**: MALDI) of HO-PEG<sub>1</sub>-c(RGDfK) (**a**).



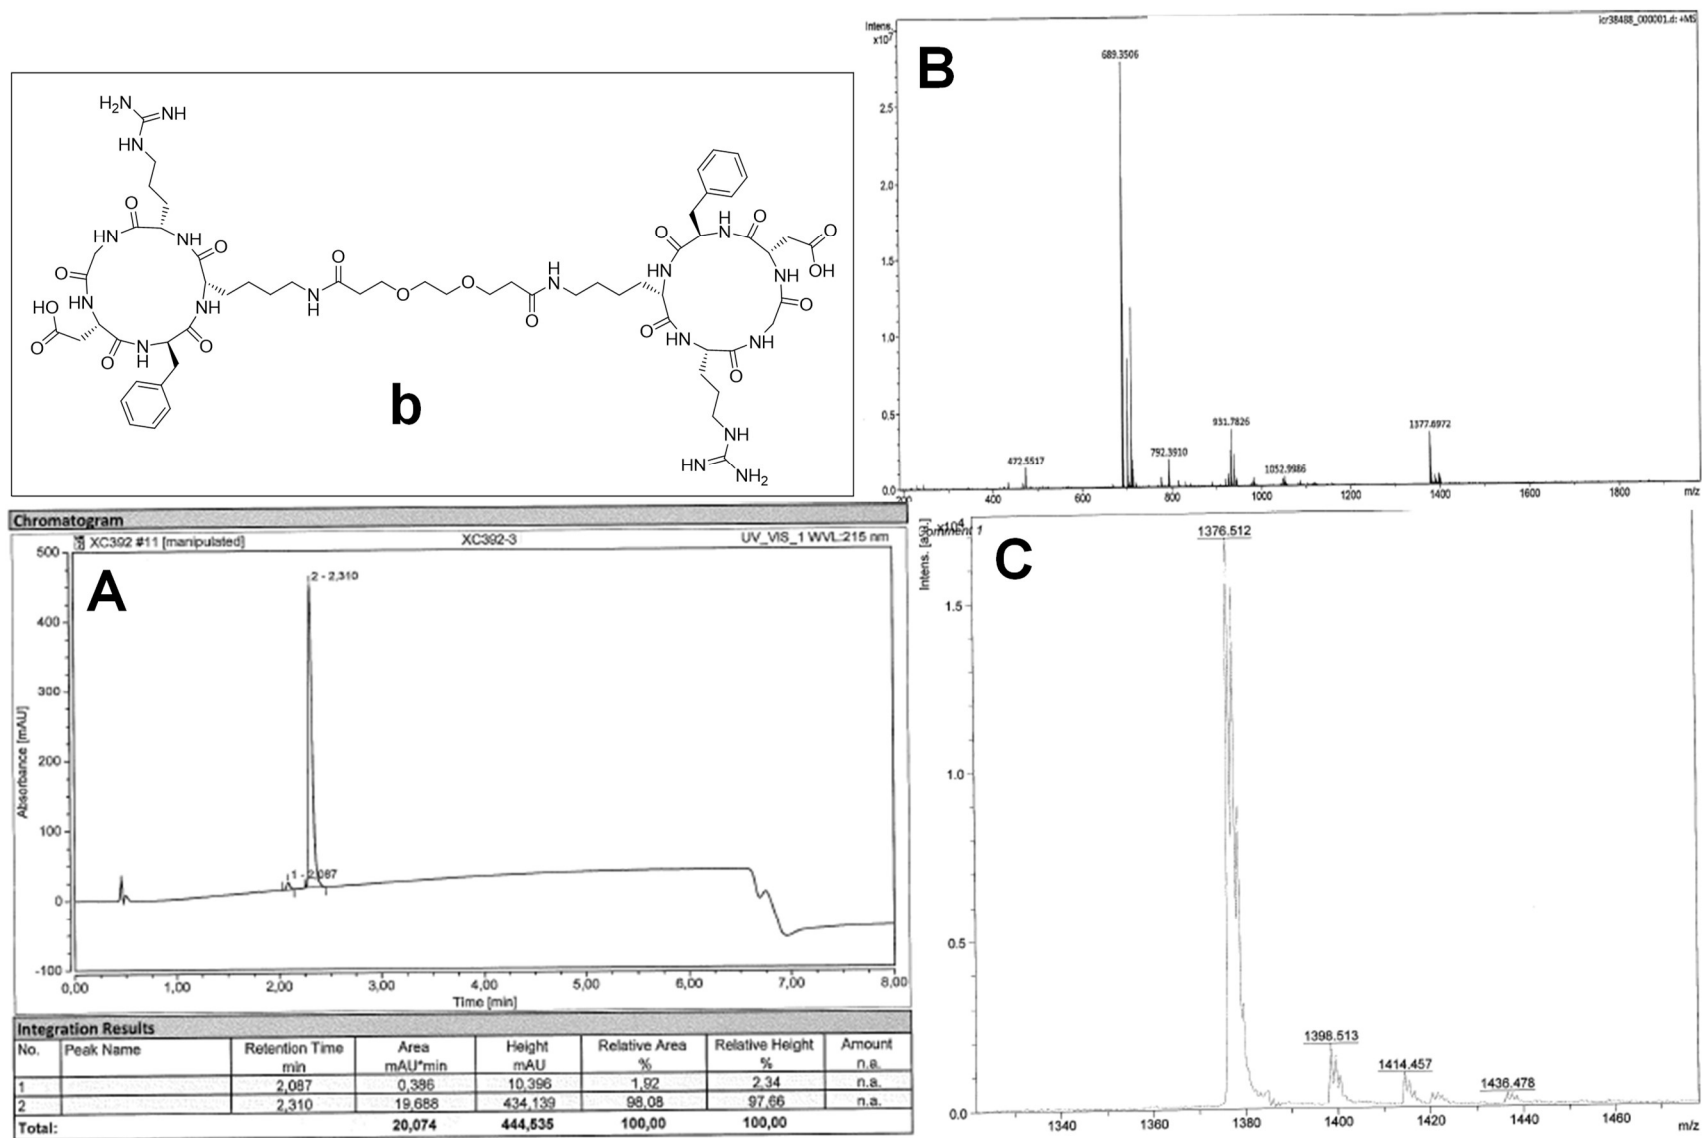

Figure S66. HPLC chromatogram **(A)** and mass spectra **(B: ESI, C: MALDI)** of c(RGDfK)-PEG<sub>1</sub>-c(RGDfK) **(b)**.

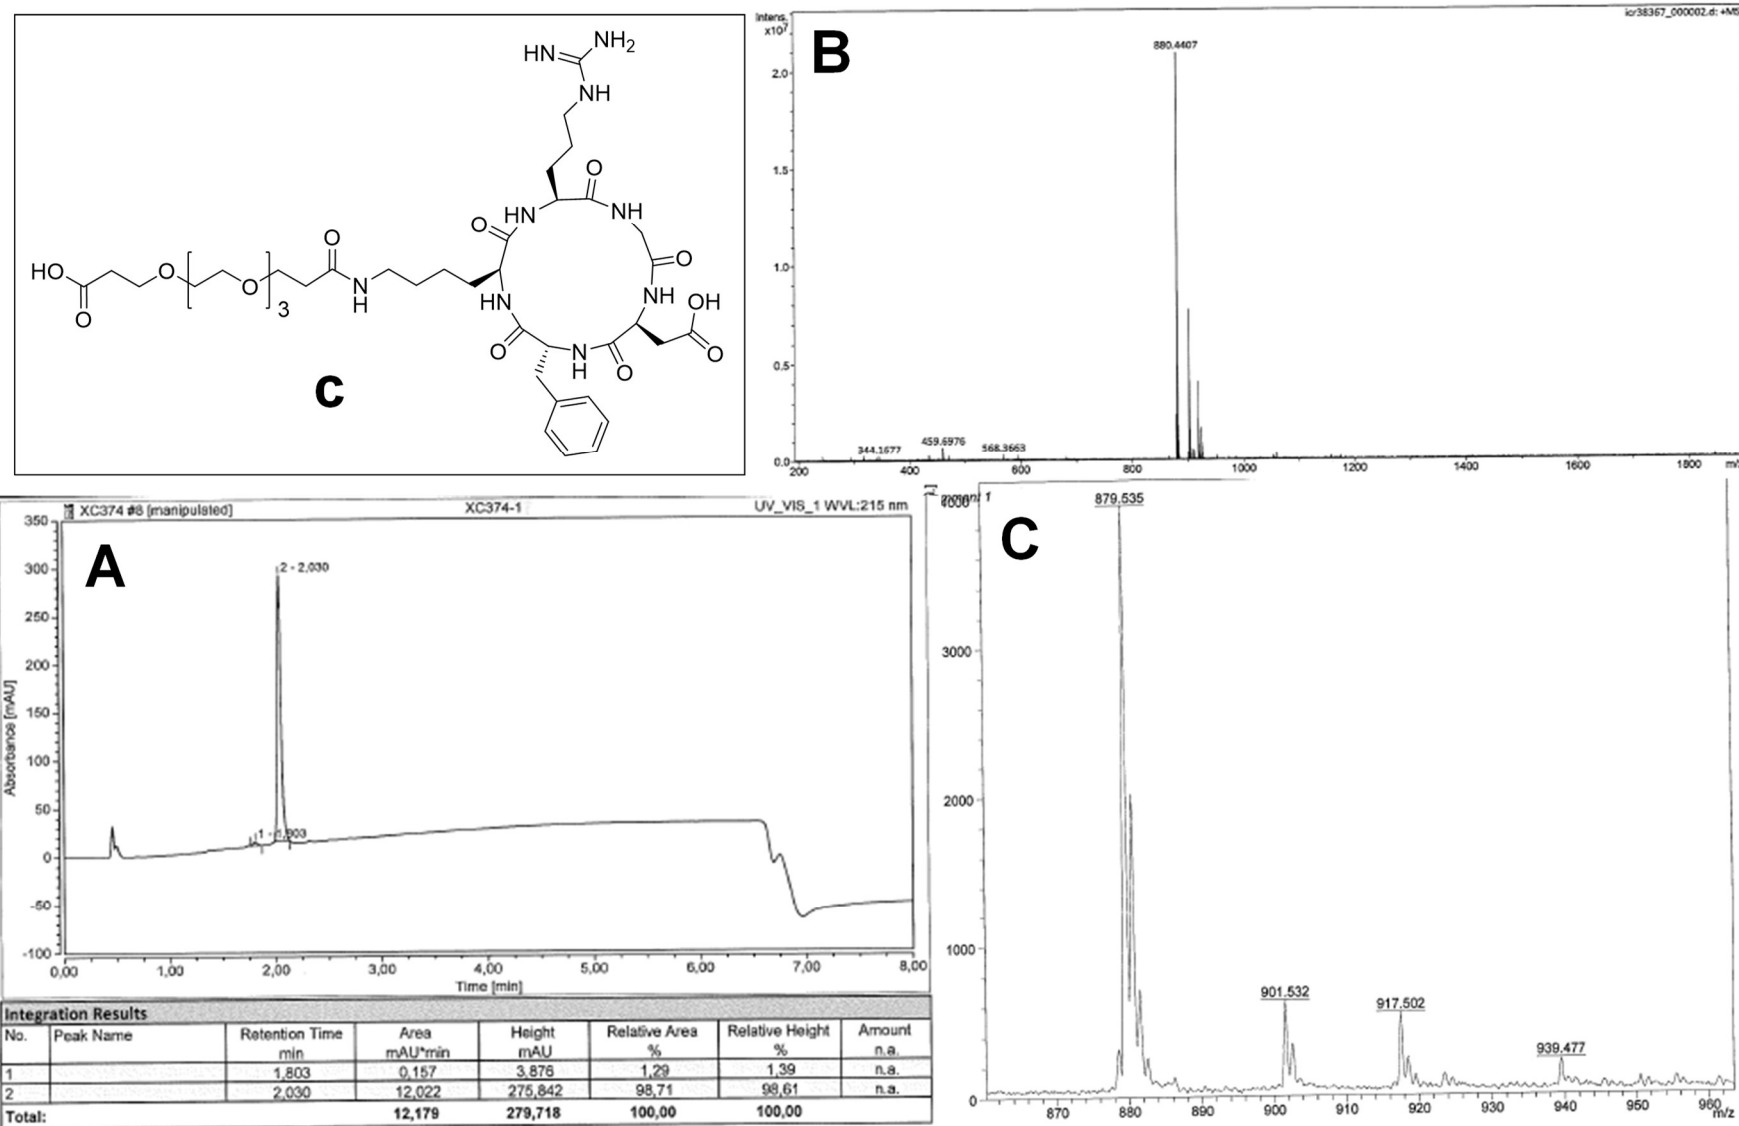

Figure S67. HPLC chromatogram (A) and mass spectra (B: ESI, C: MALDI) of HO-PEG<sub>3</sub>-c(RGDfK) (c).

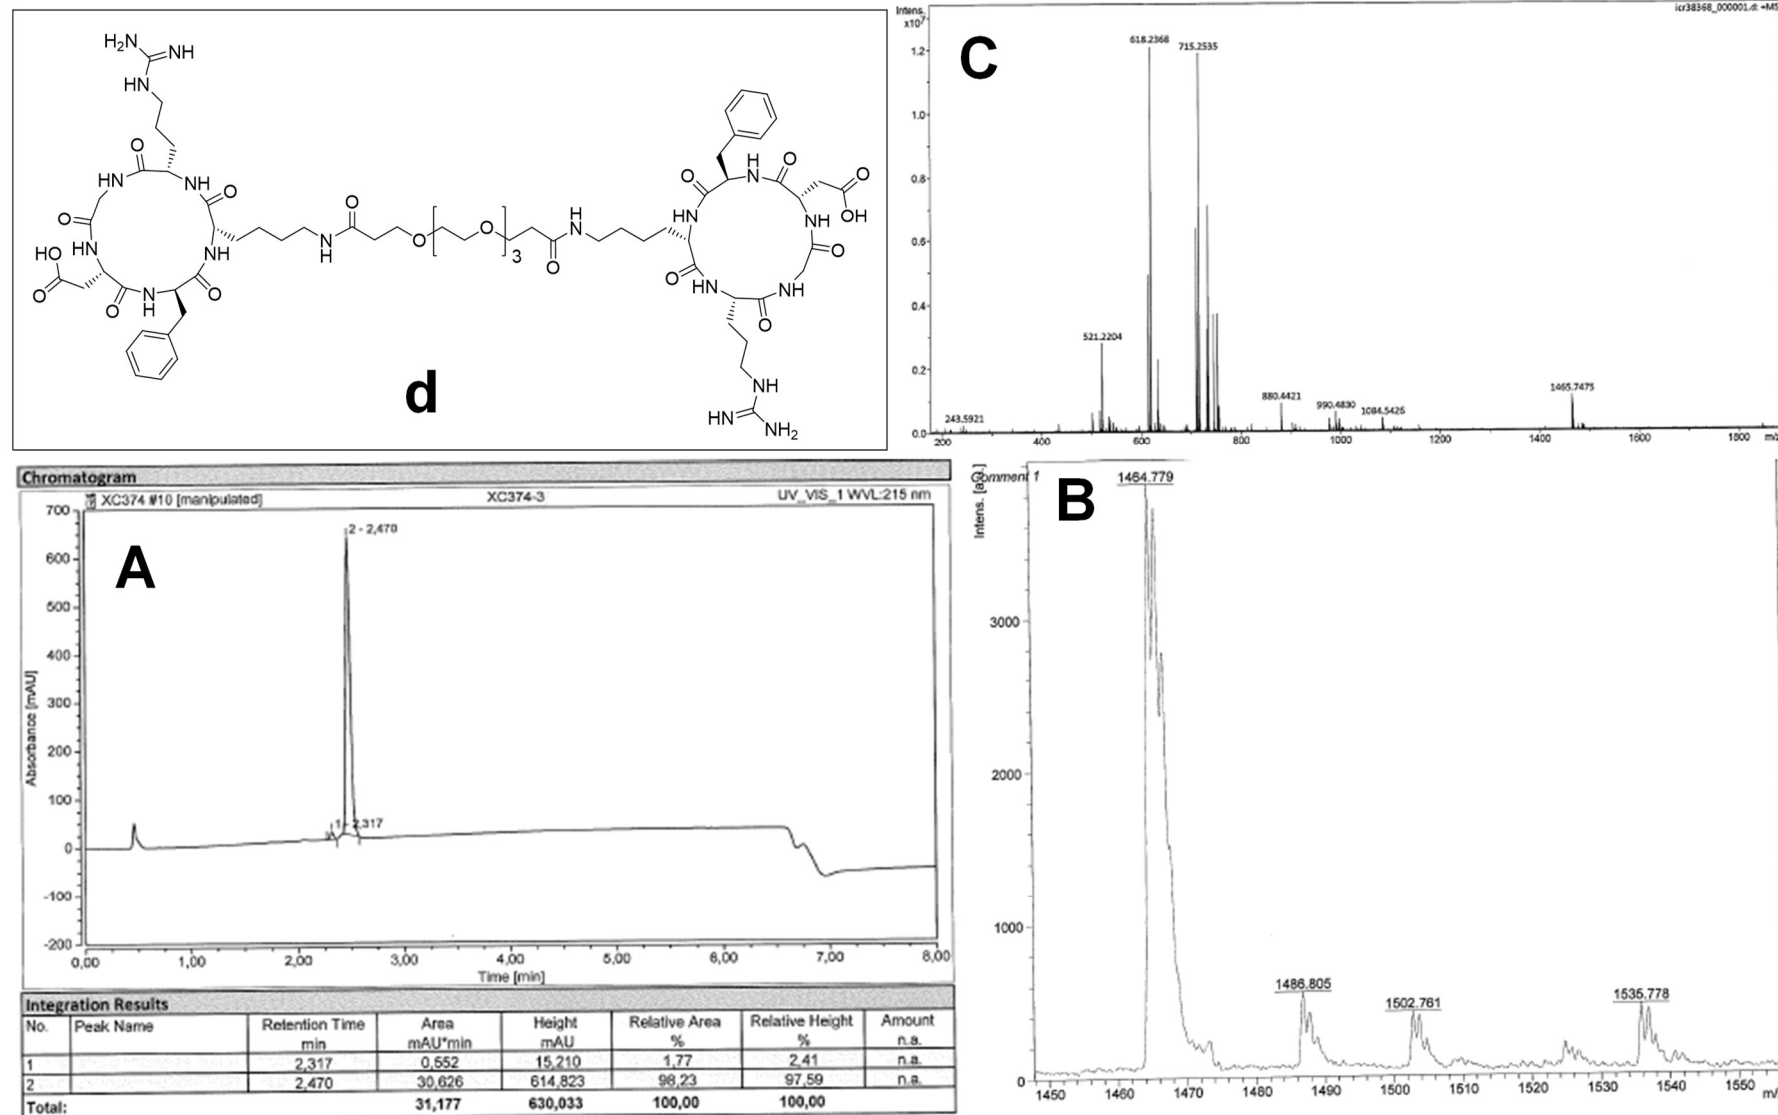

Figure S68. HPLC chromatogram (A) and mass spectra (B: ESI, C: MALDI) of c(RGDfK)-PEG<sub>3</sub>-c(RGDfK) (d).

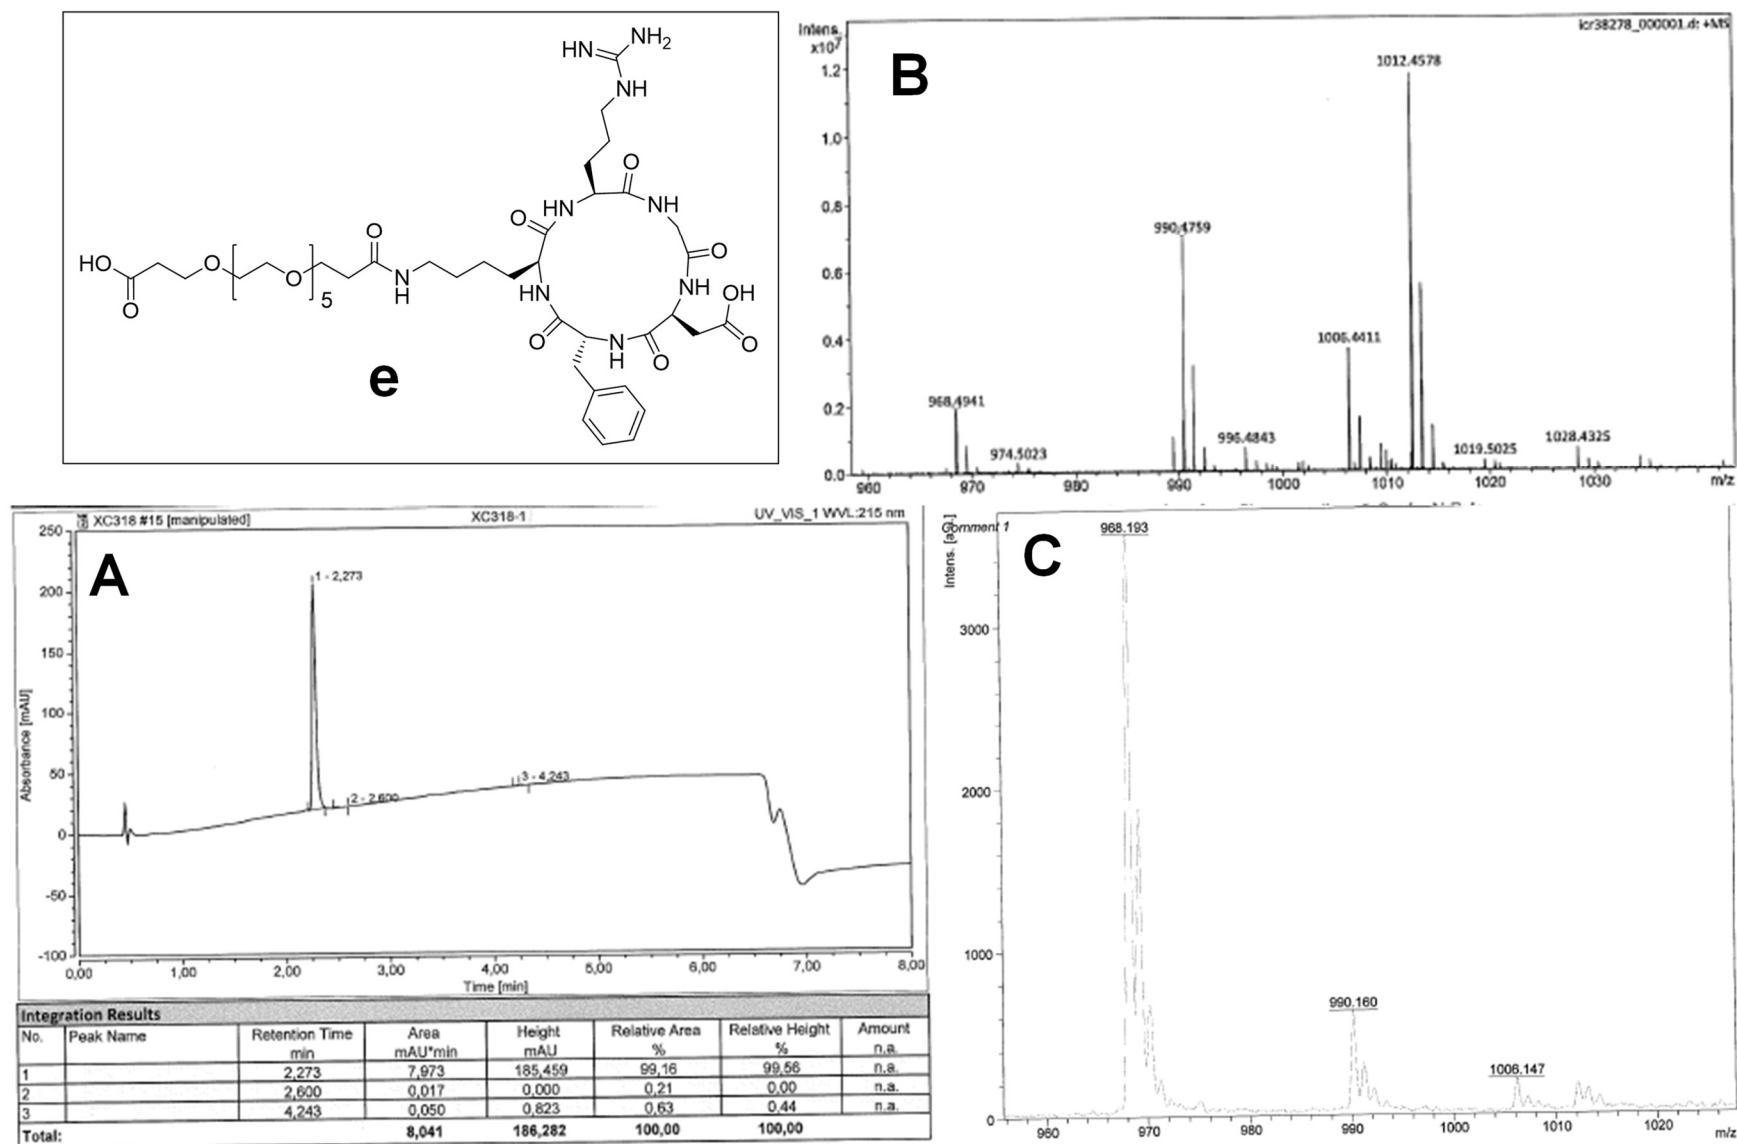

Figure S69. HPLC chromatogram (A) and mass spectra (B: ESI, C: MALDI) of HO-PEG<sub>5</sub>-c(RGDfK) (e).

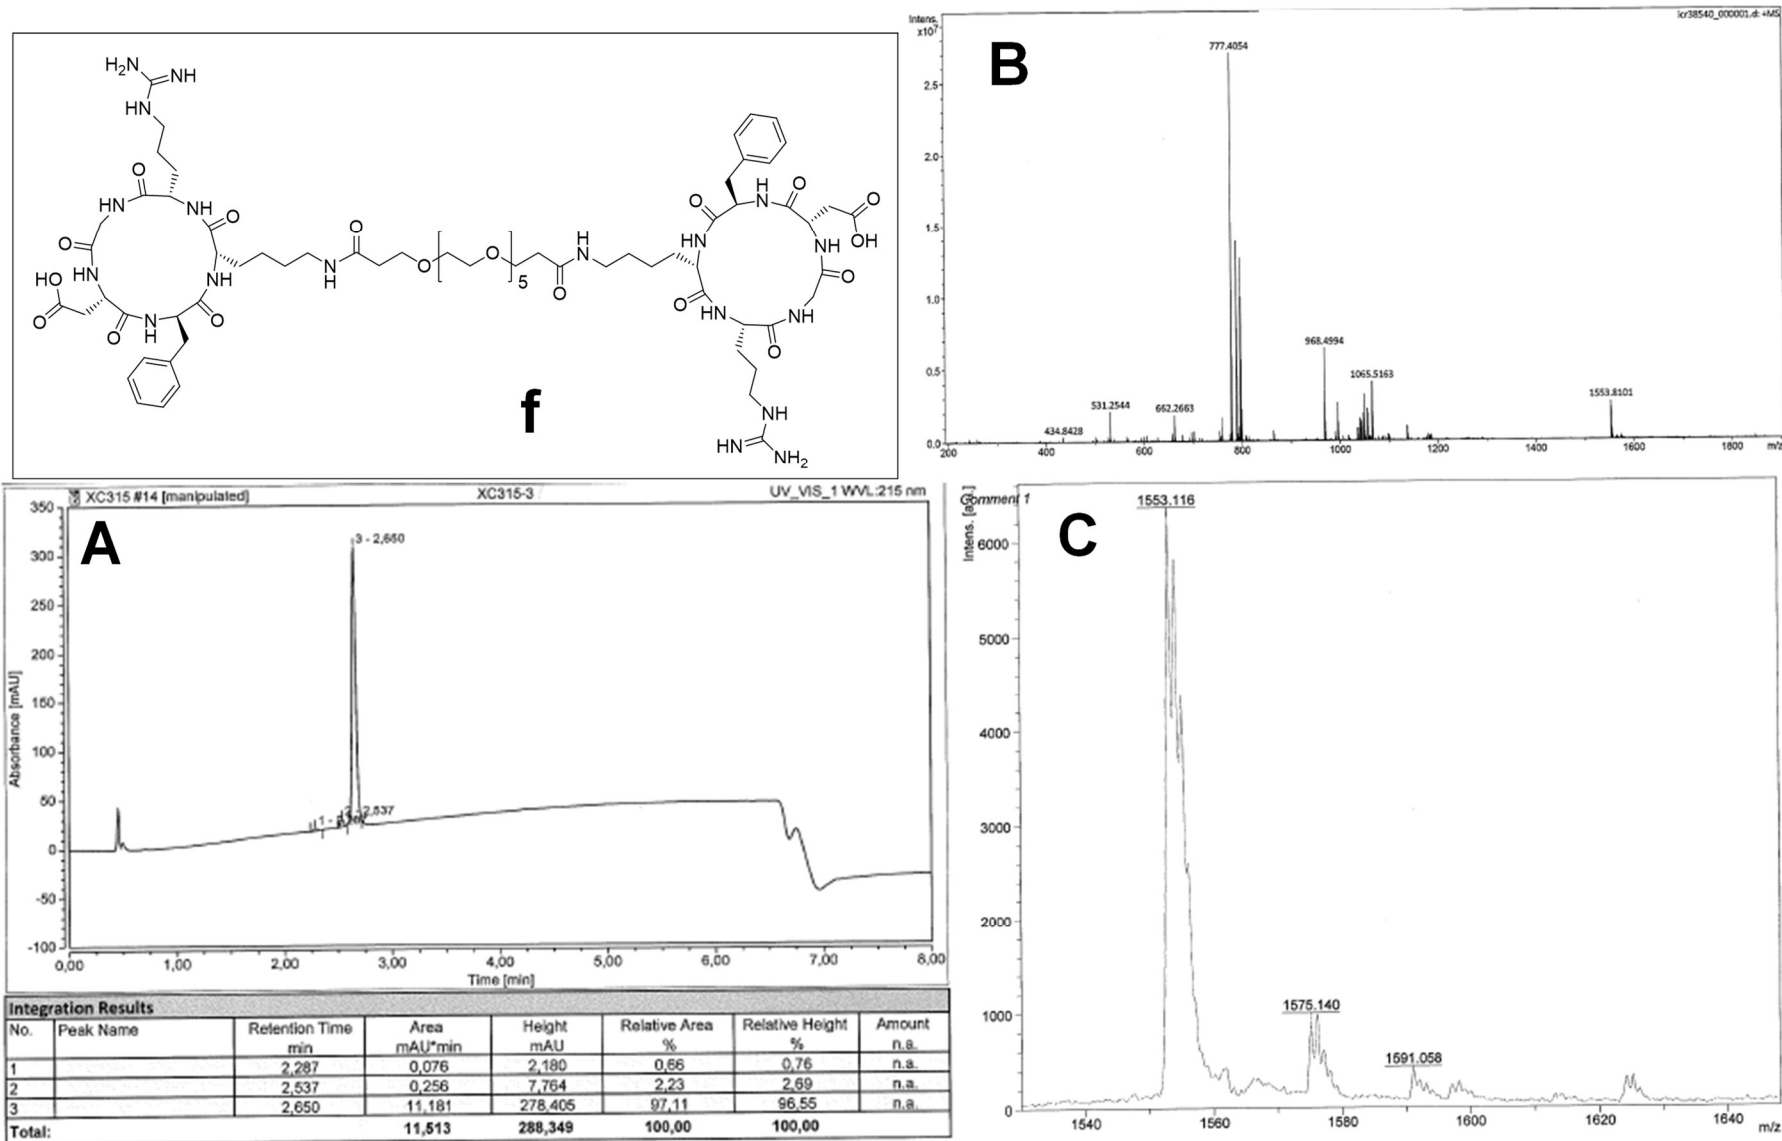

Figure S70. HPLC chromatogram (**A**) and mass spectra (**B**: ESI, **C**: MALDI) of c(RGDfK)-PEG<sub>5</sub>-c(RGDfK) (**f**).

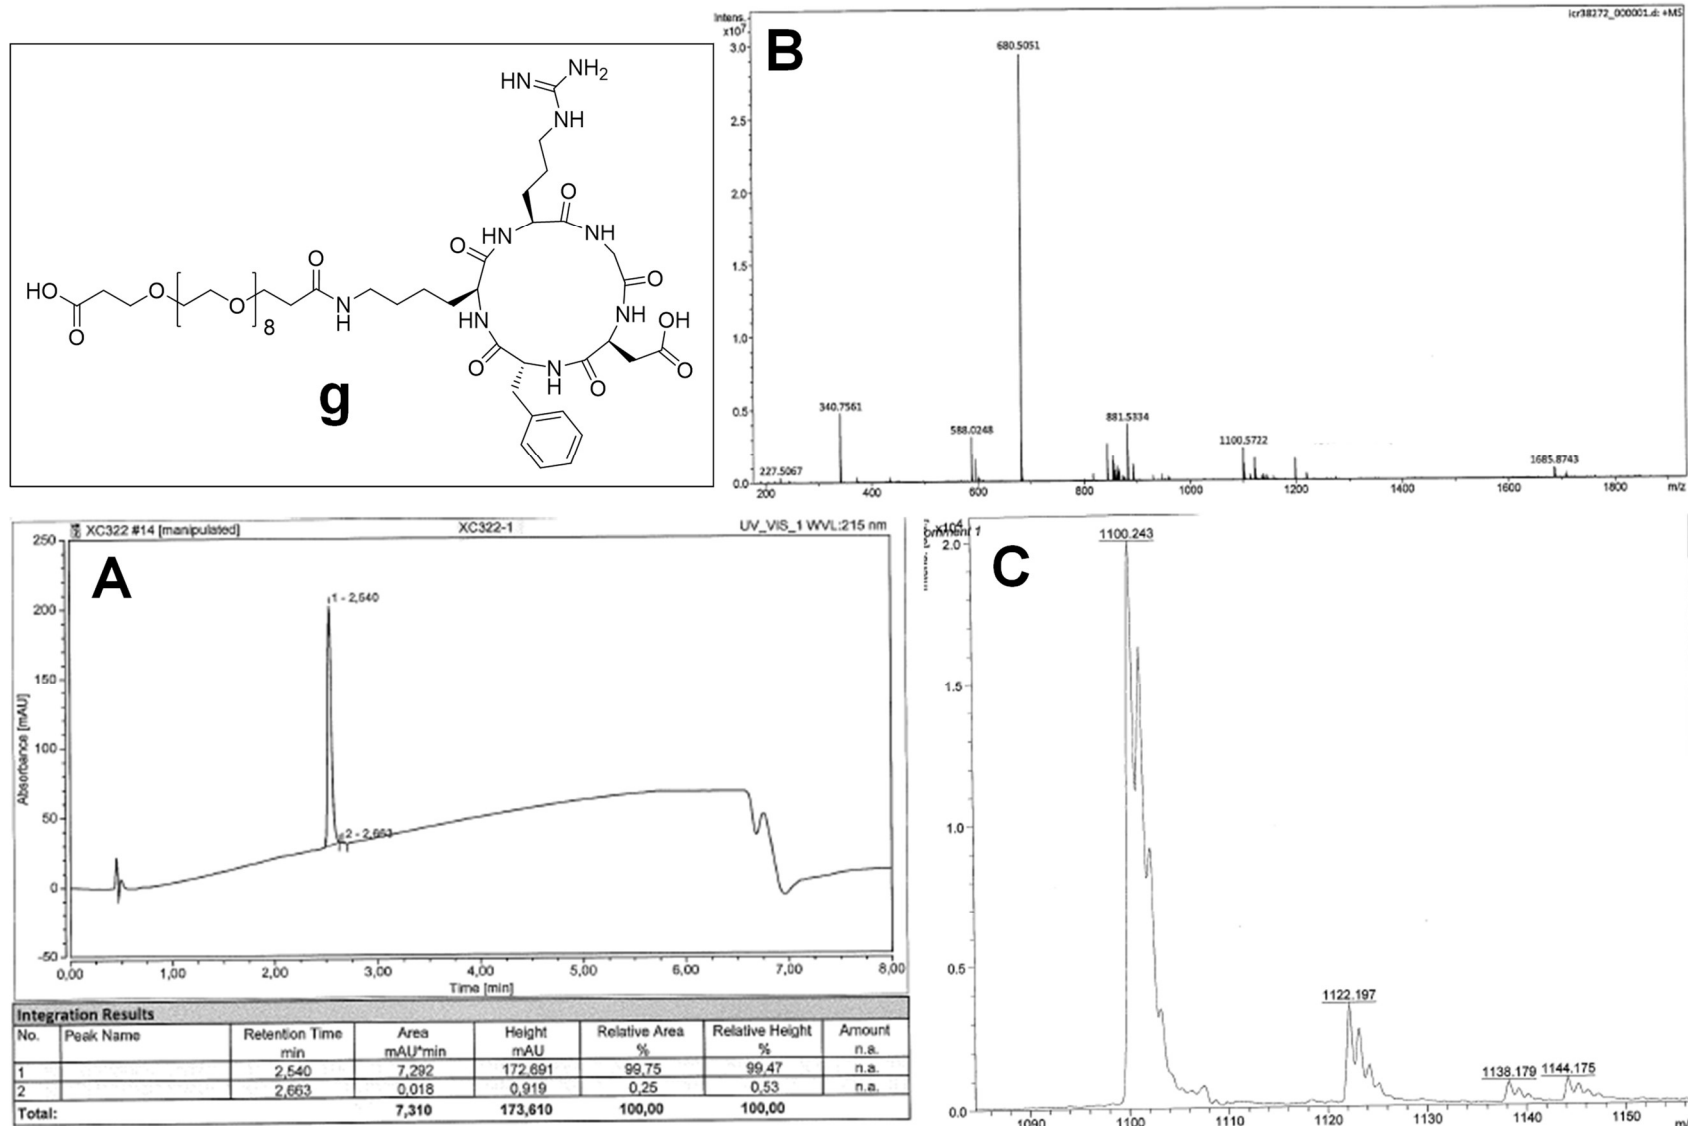

Figure S71. HPLC chromatogram (**A**) and mass spectra (**B**: ESI, **C**: MALDI) of HO-PEG<sub>8</sub>-c(RGDfK) (**g**).

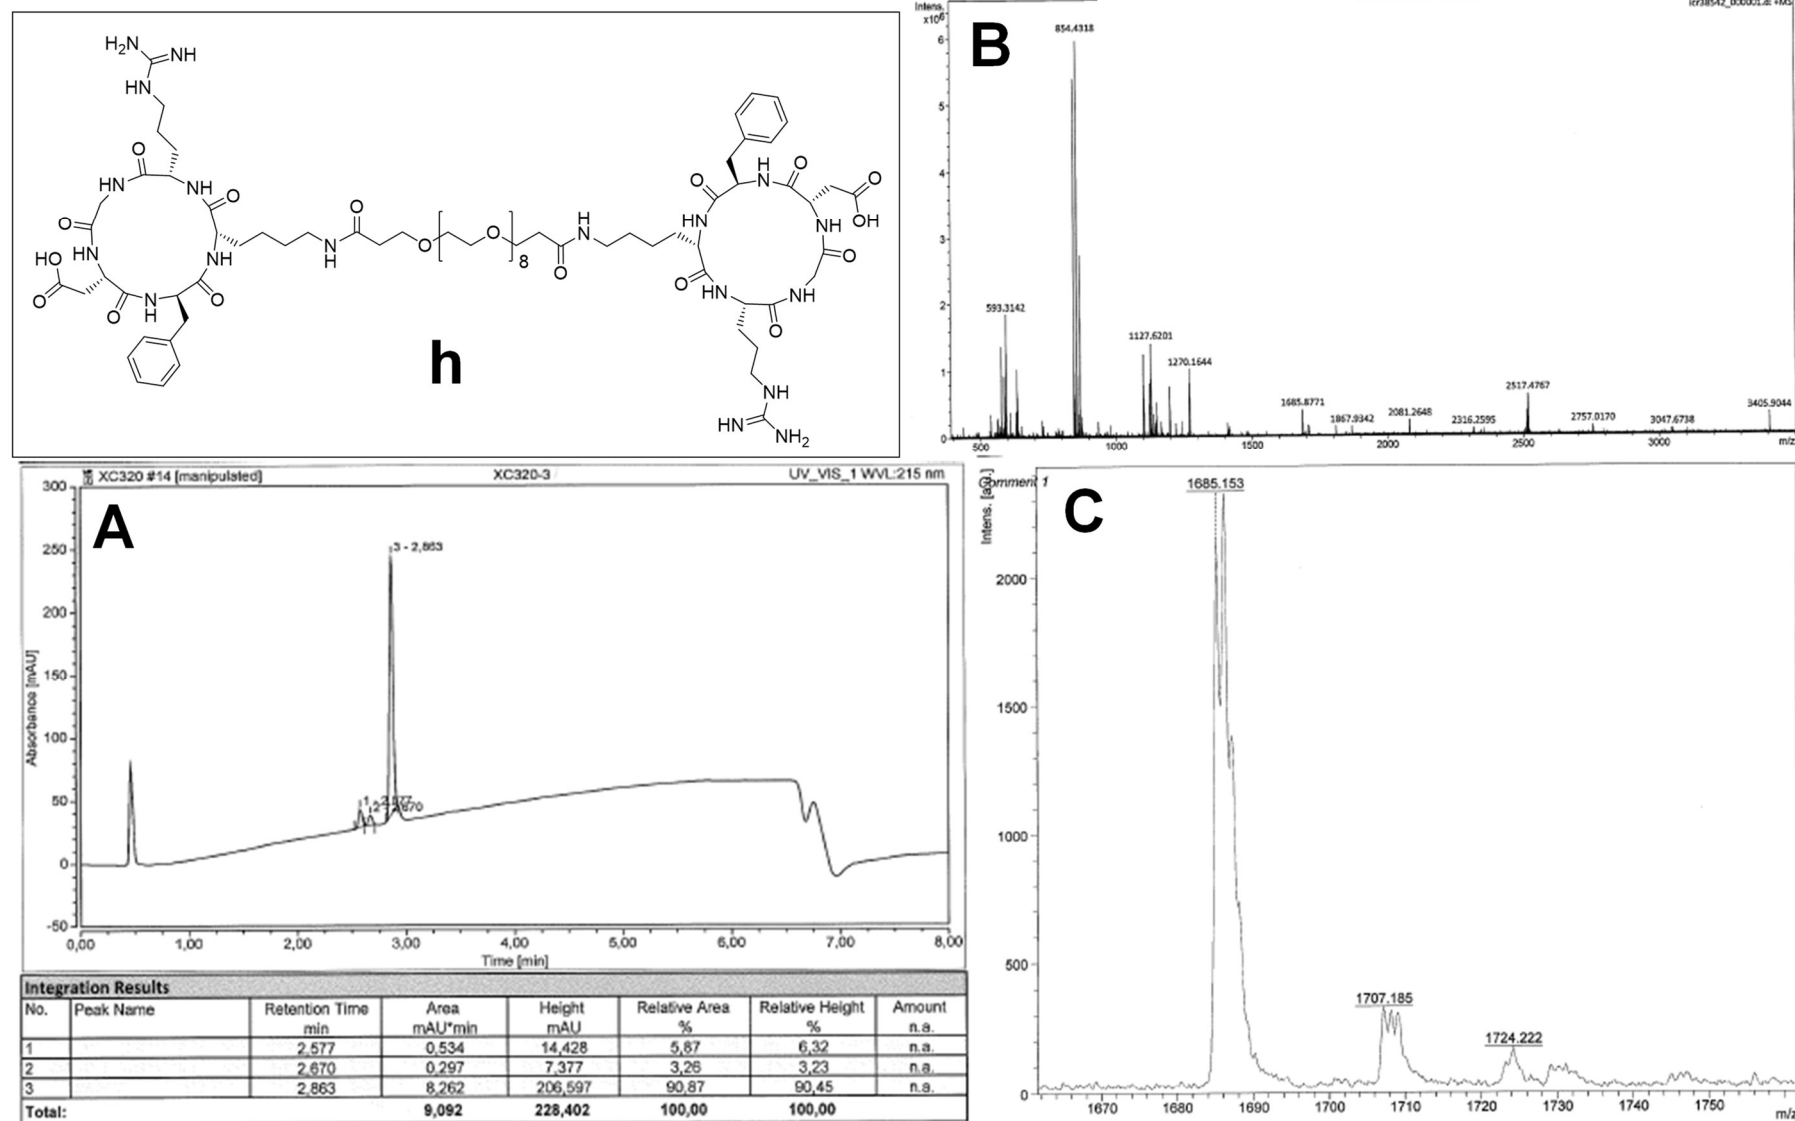

Figure S72. HPLC chromatogram (A) and mass spectra (B: ESI, C: MALDI) of c(RGDfK)-PEG<sub>8</sub>-c(RGDfK) (h).

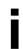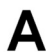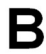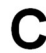

Figure S73. HPLC chromatogram (**A**) and mass spectra (**B**: ESI, **C**: MALDI) of HO-PEG<sub>1</sub>-GG-Nle-c(DHfRWK) (**i**).



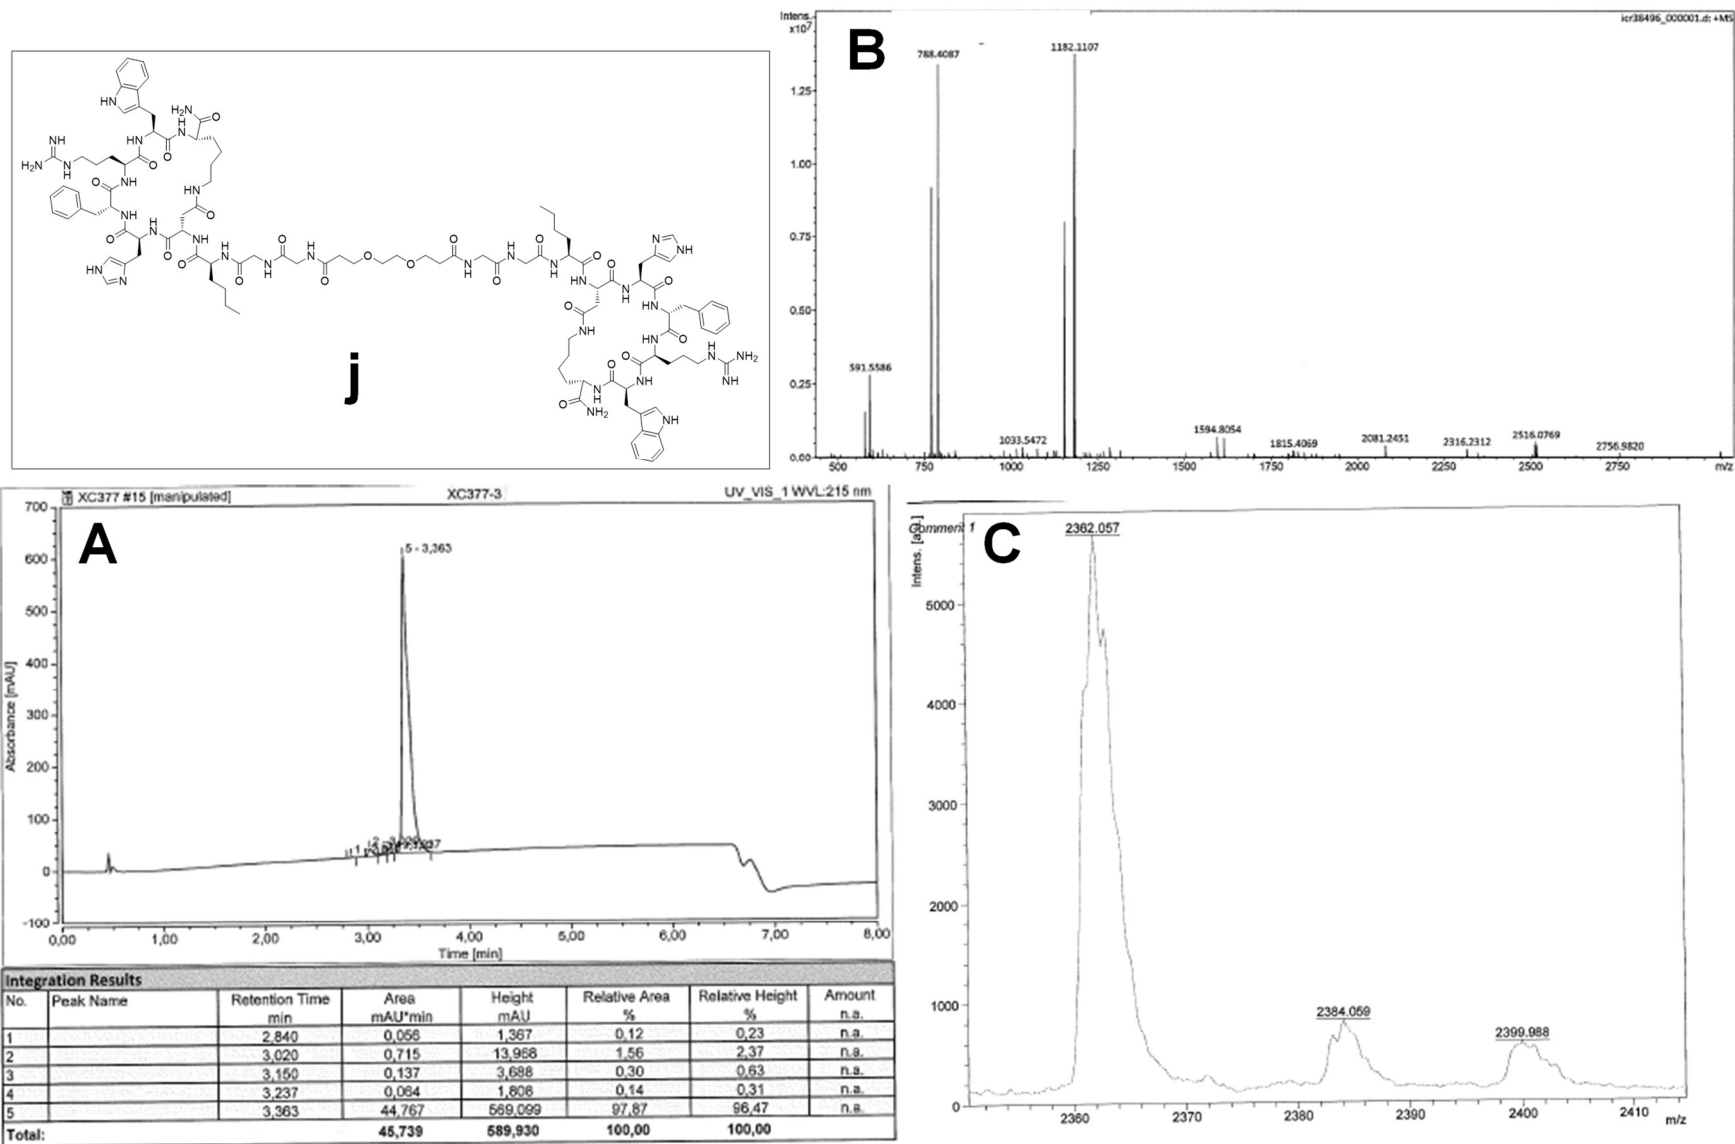

Figure S74. HPLC chromatogram (A) and mass spectra (B: ESI, C: MALDI) of c(DHfRWK)-Nle-GG-PEG<sub>1</sub>-GG-Nle-c(DHfRWK) (j).





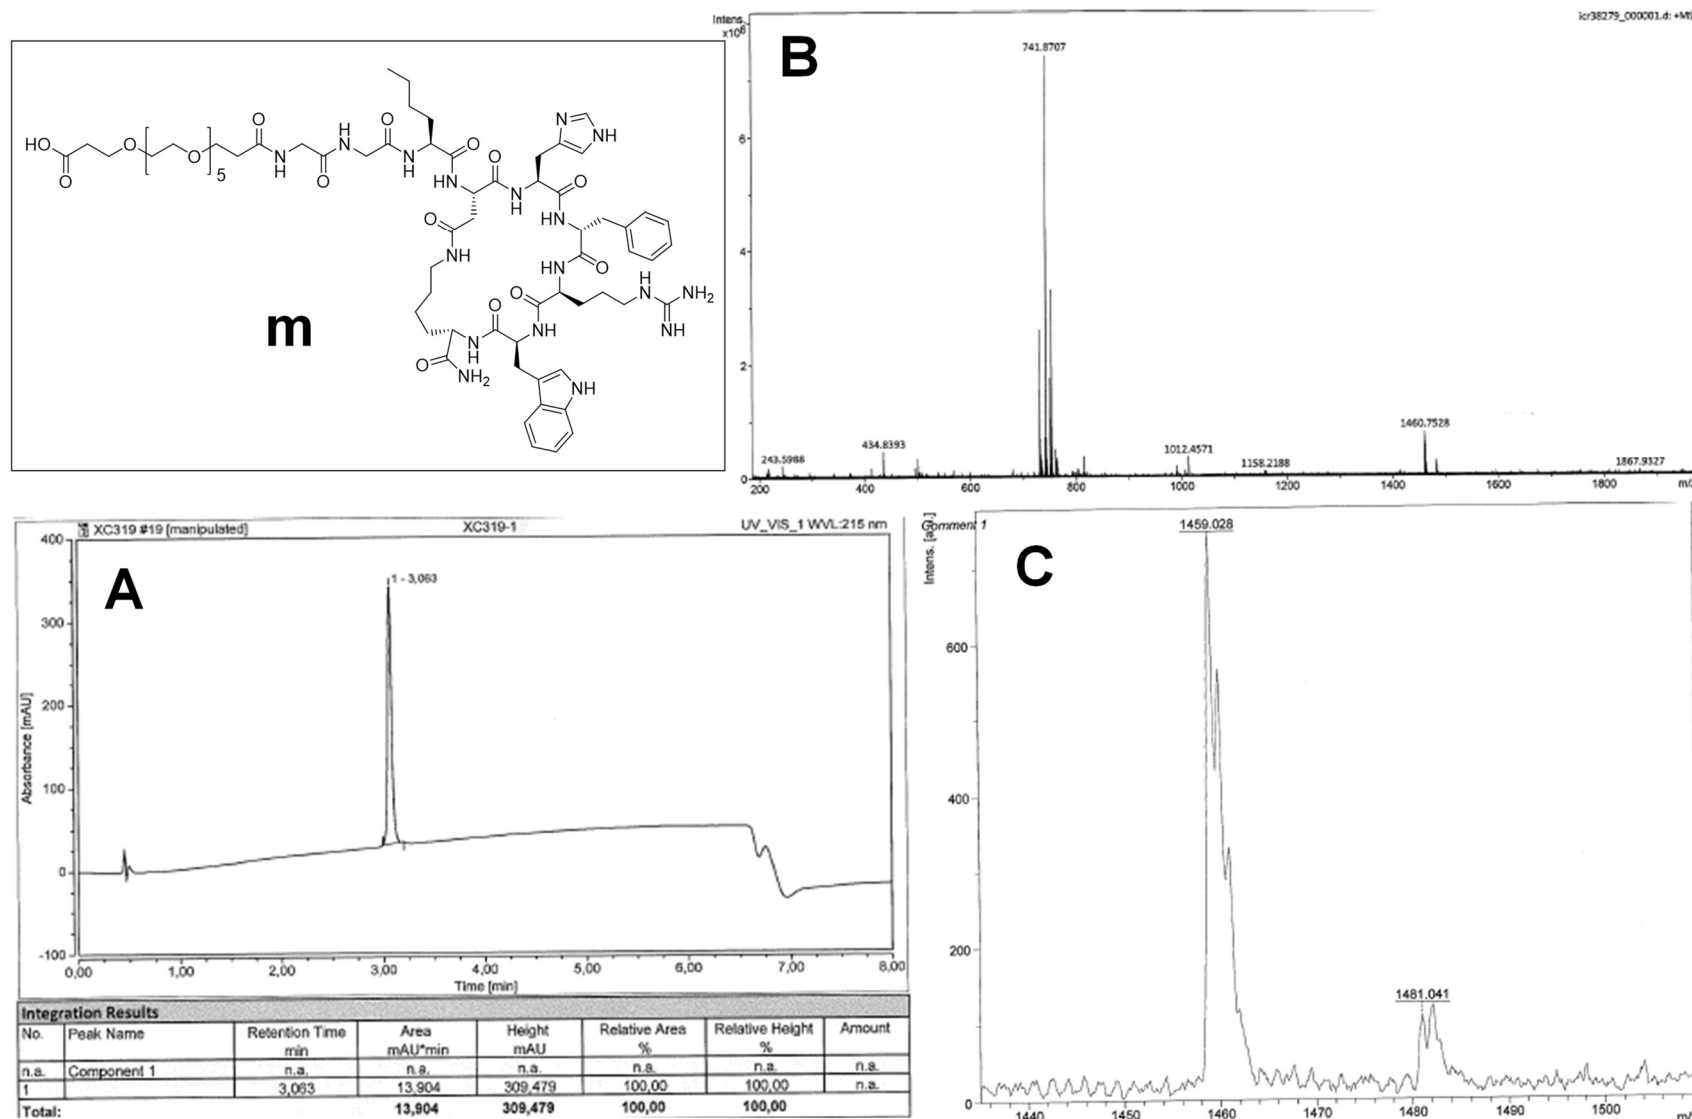

Figure S77. HPLC chromatogram (A) and mass spectra (B: ESI, C: MALDI) of HO-PEG<sub>5</sub>-GG-Nle-c(DHfRWK) (m).

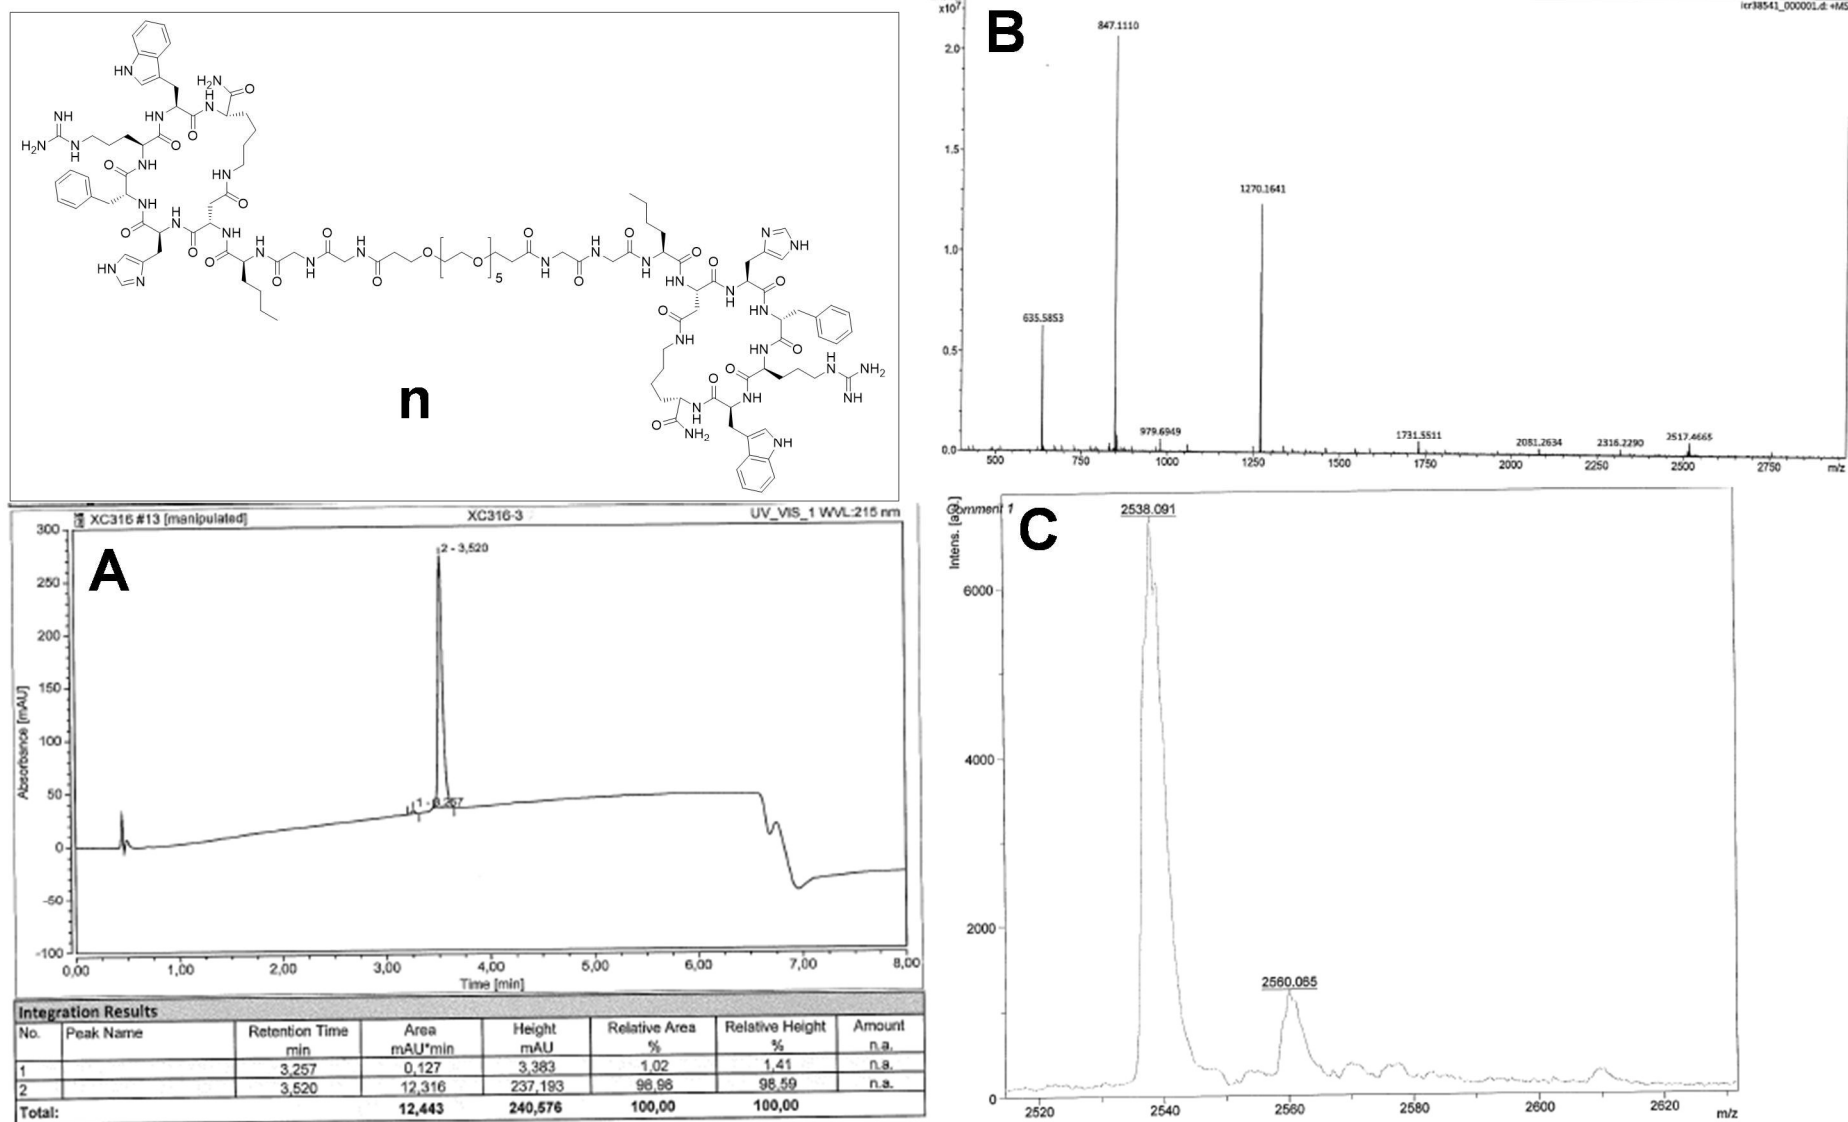

Figure S78. HPLC chromatogram (**A**) and mass spectra (**B**: ESI, **C**: MALDI) of c(DHfRWK)-Nle-GG-PEG<sub>5</sub>-GG-Nle-c(DHfRWK) (**n**).

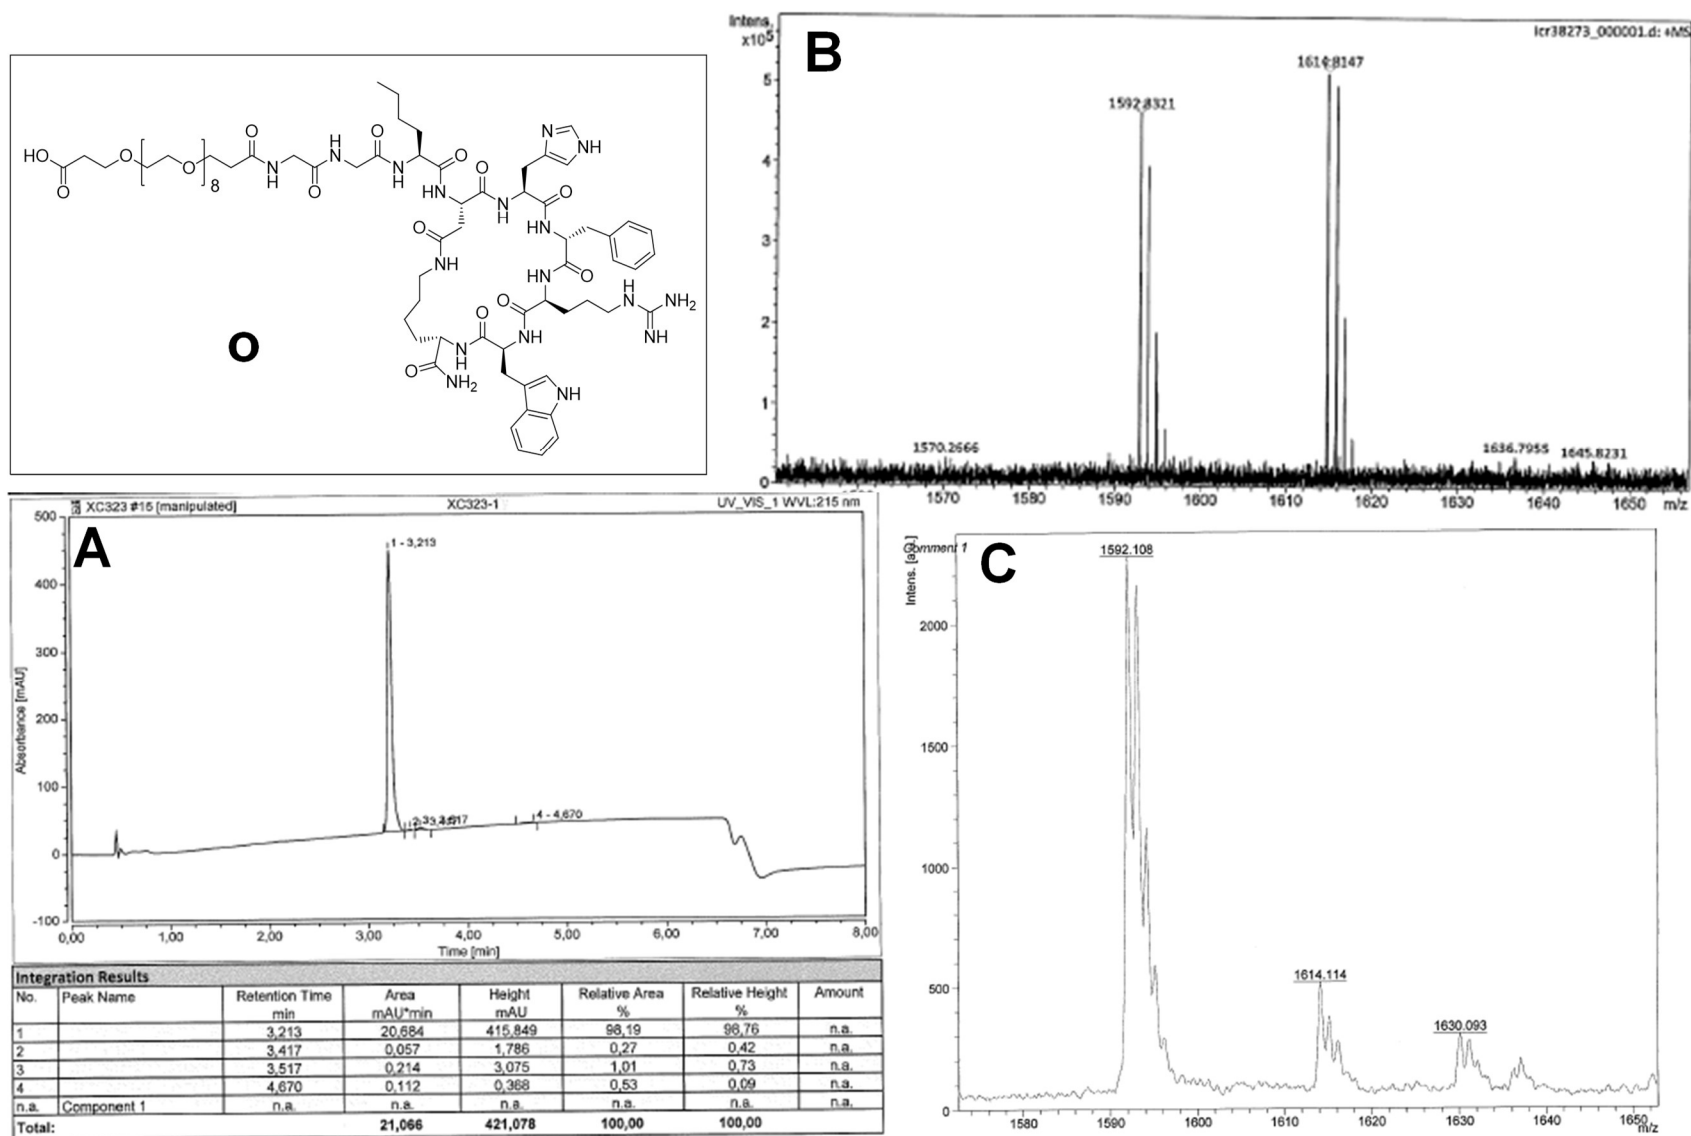

Figure S79. HPLC chromatogram (**A**) and mass spectra (**B**: ESI, **C**: MALDI) of HO-PEG<sub>8</sub>-GG-Nle-c(DHfRWK) (**o**).



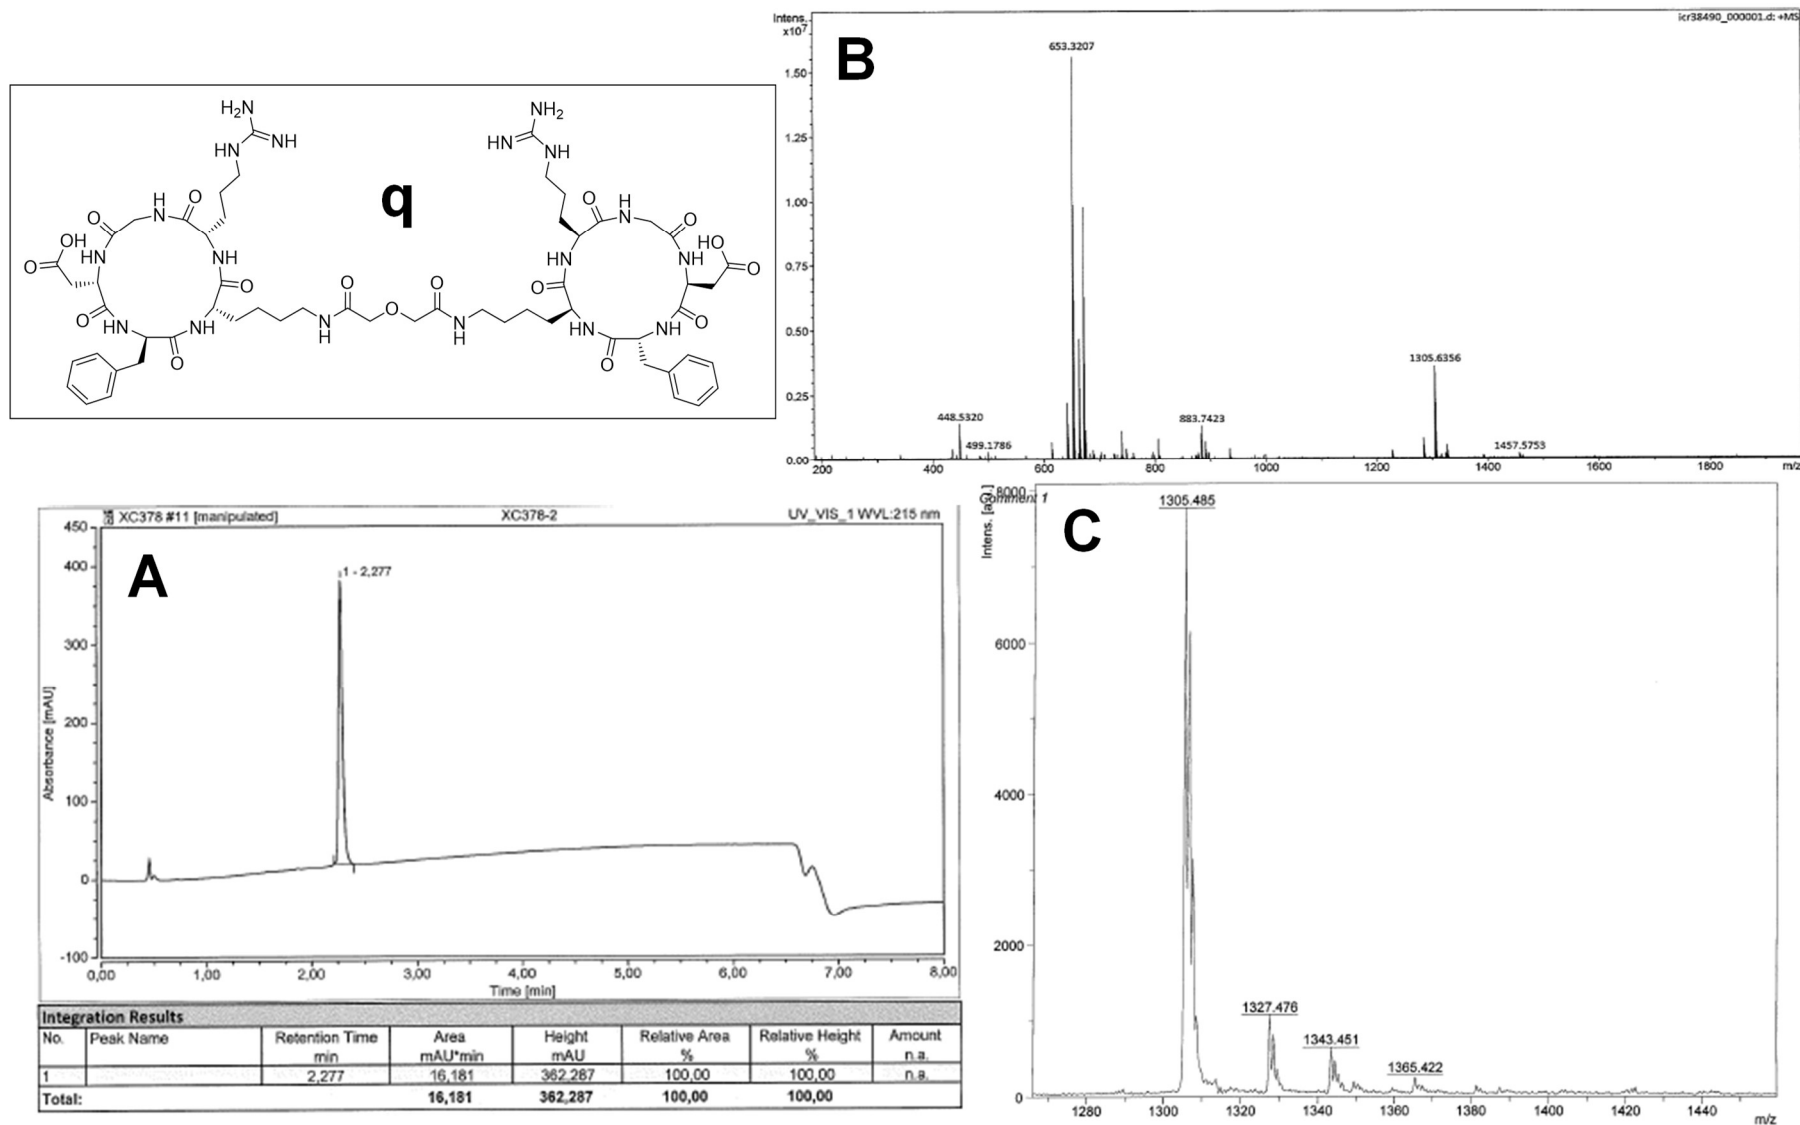

Figure S81. HPLC chromatogram (A) and mass spectra (B: ESI, C: MALDI) of c(RGDfK)-DIG-c(RGDfK) (q).



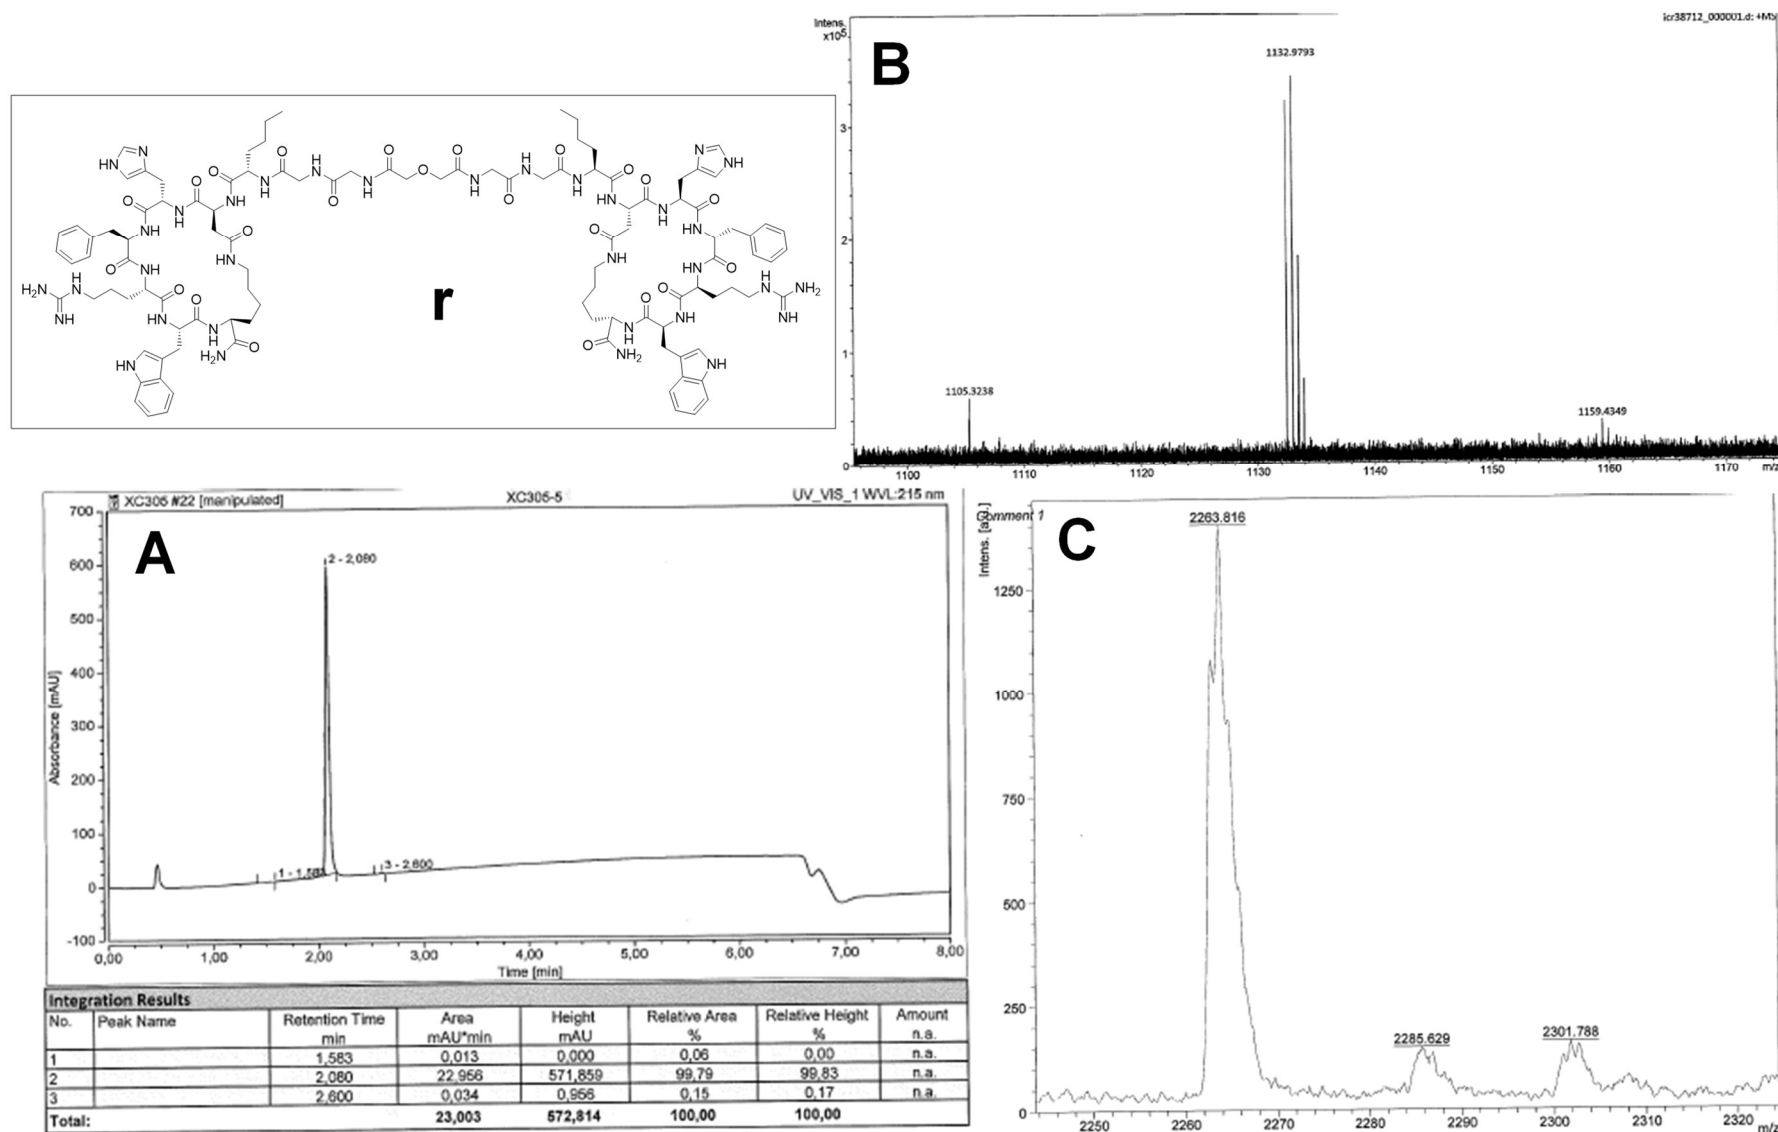

Figure S82. HPLC chromatogram (**A**) and mass spectra (**B**: ESI, **C**: MALDI) of c(RGDfK)-EGEGE-Ox-EGEGE-c(RGDfK) (**r**).

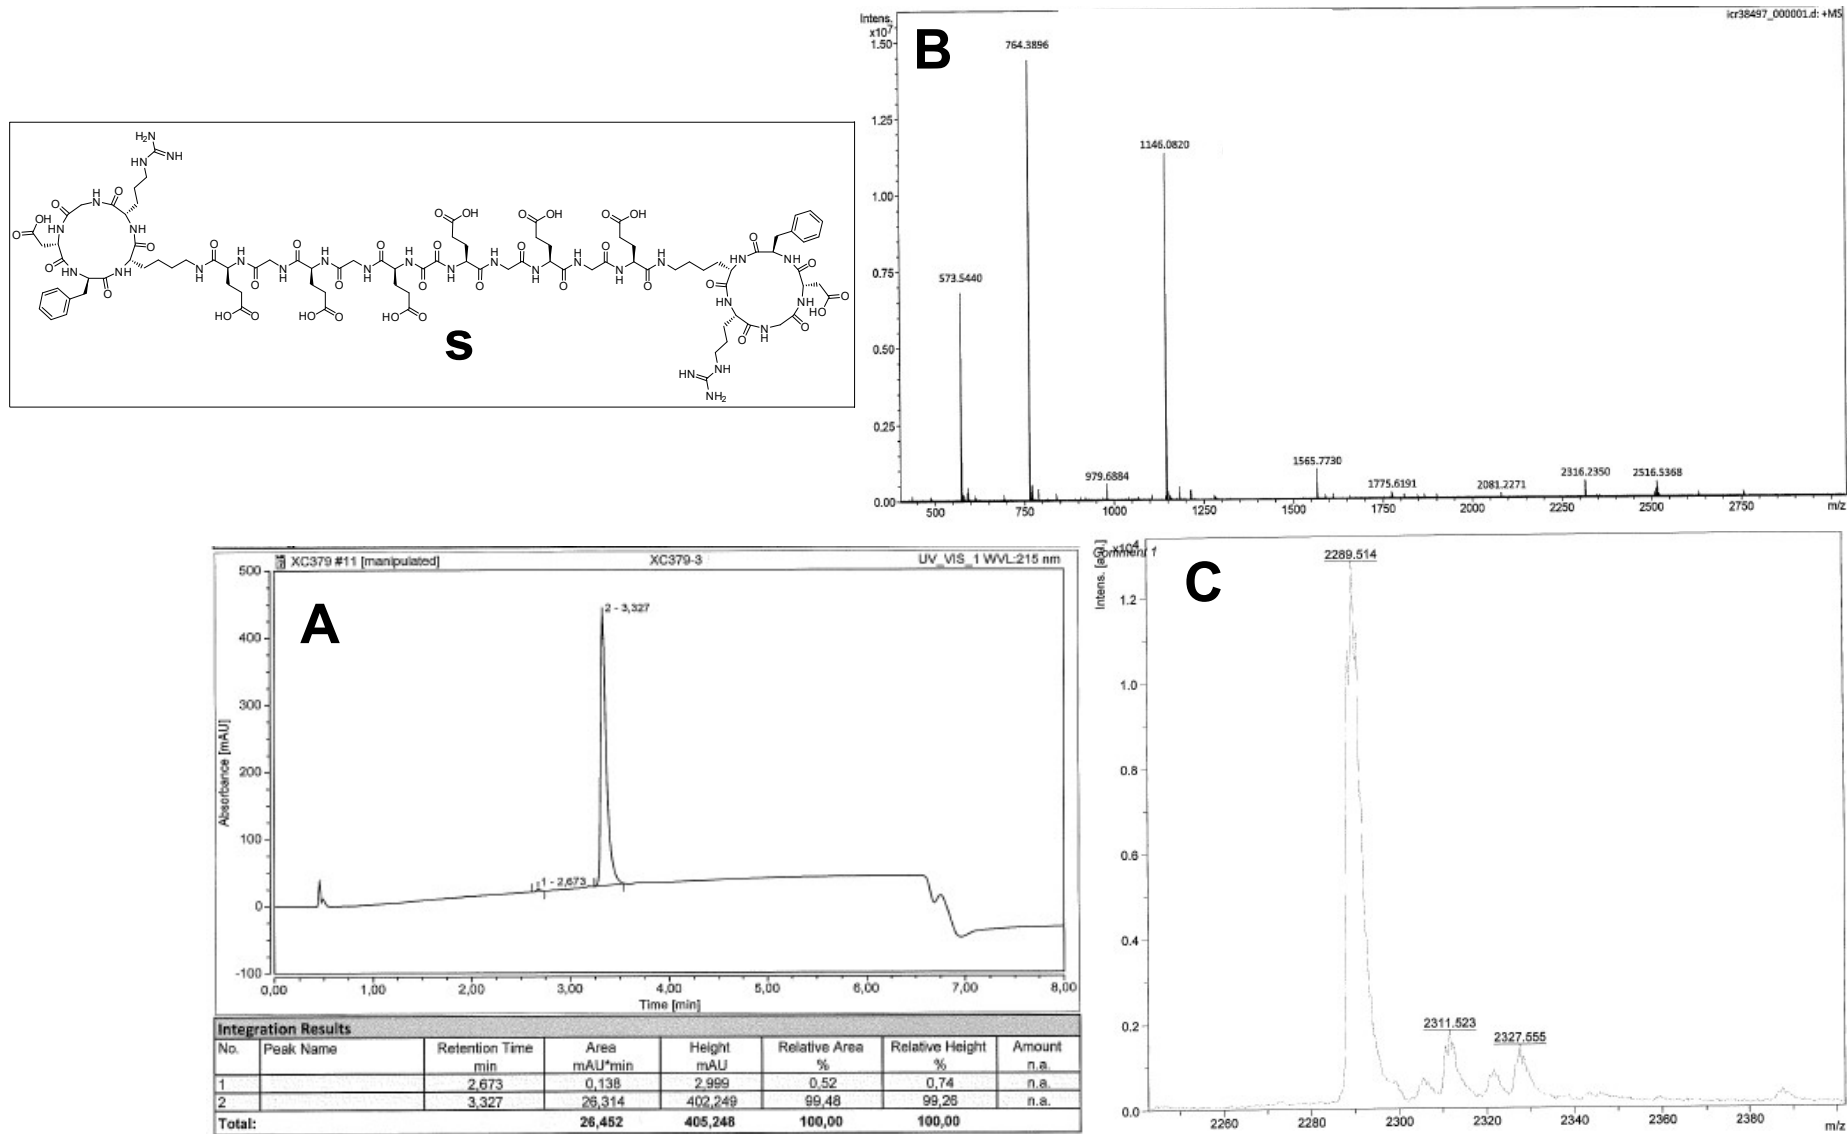

Figure S83. HPLC chromatogram (**A**) and mass spectra (**B**: ESI, **C**: MALDI) of c(DHfRWK)-Nle-GG-DIG-GG-Nle-c(DHfRWK) (**s**).

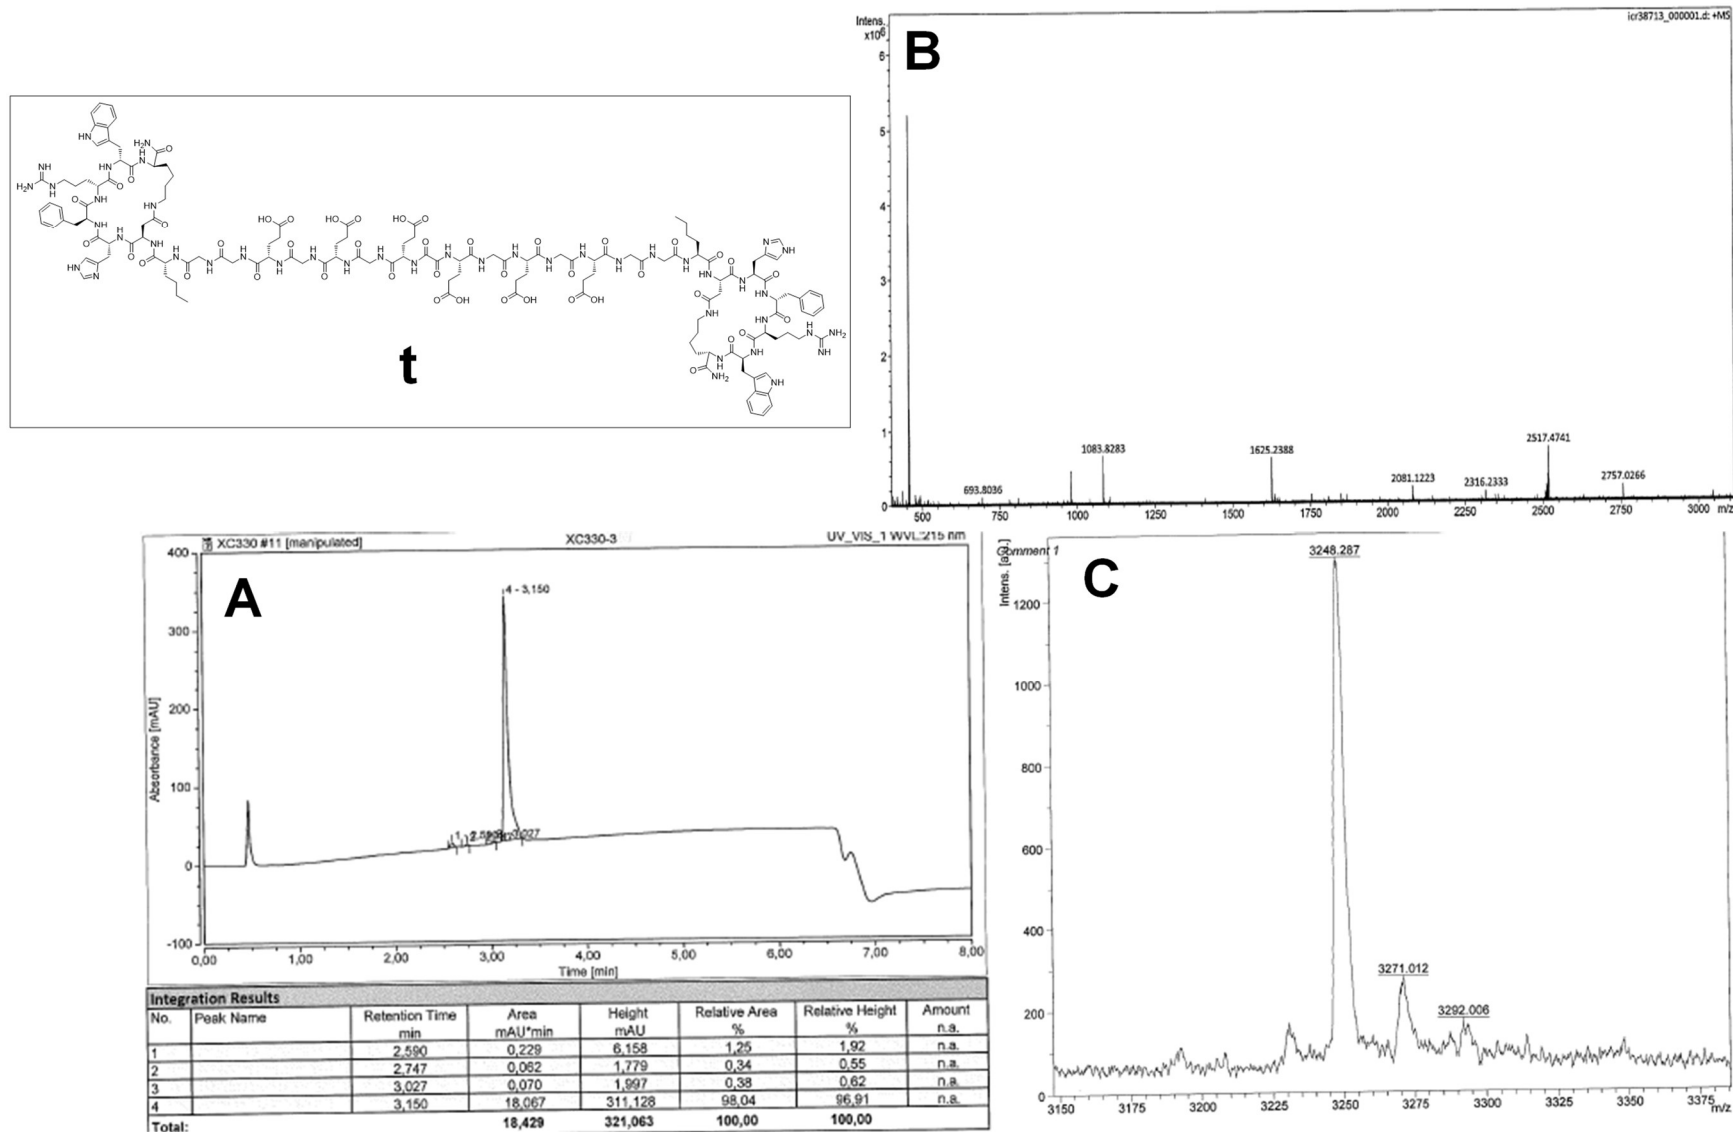

Figure S84. HPLC chromatogram (A) and mass spectra (B: ESI, C: MALDI) of c(DHfRWK)-Nle-GG-EGEGE-Ox-EGEGE-GG-Nle-c(DHfRWK) (t).

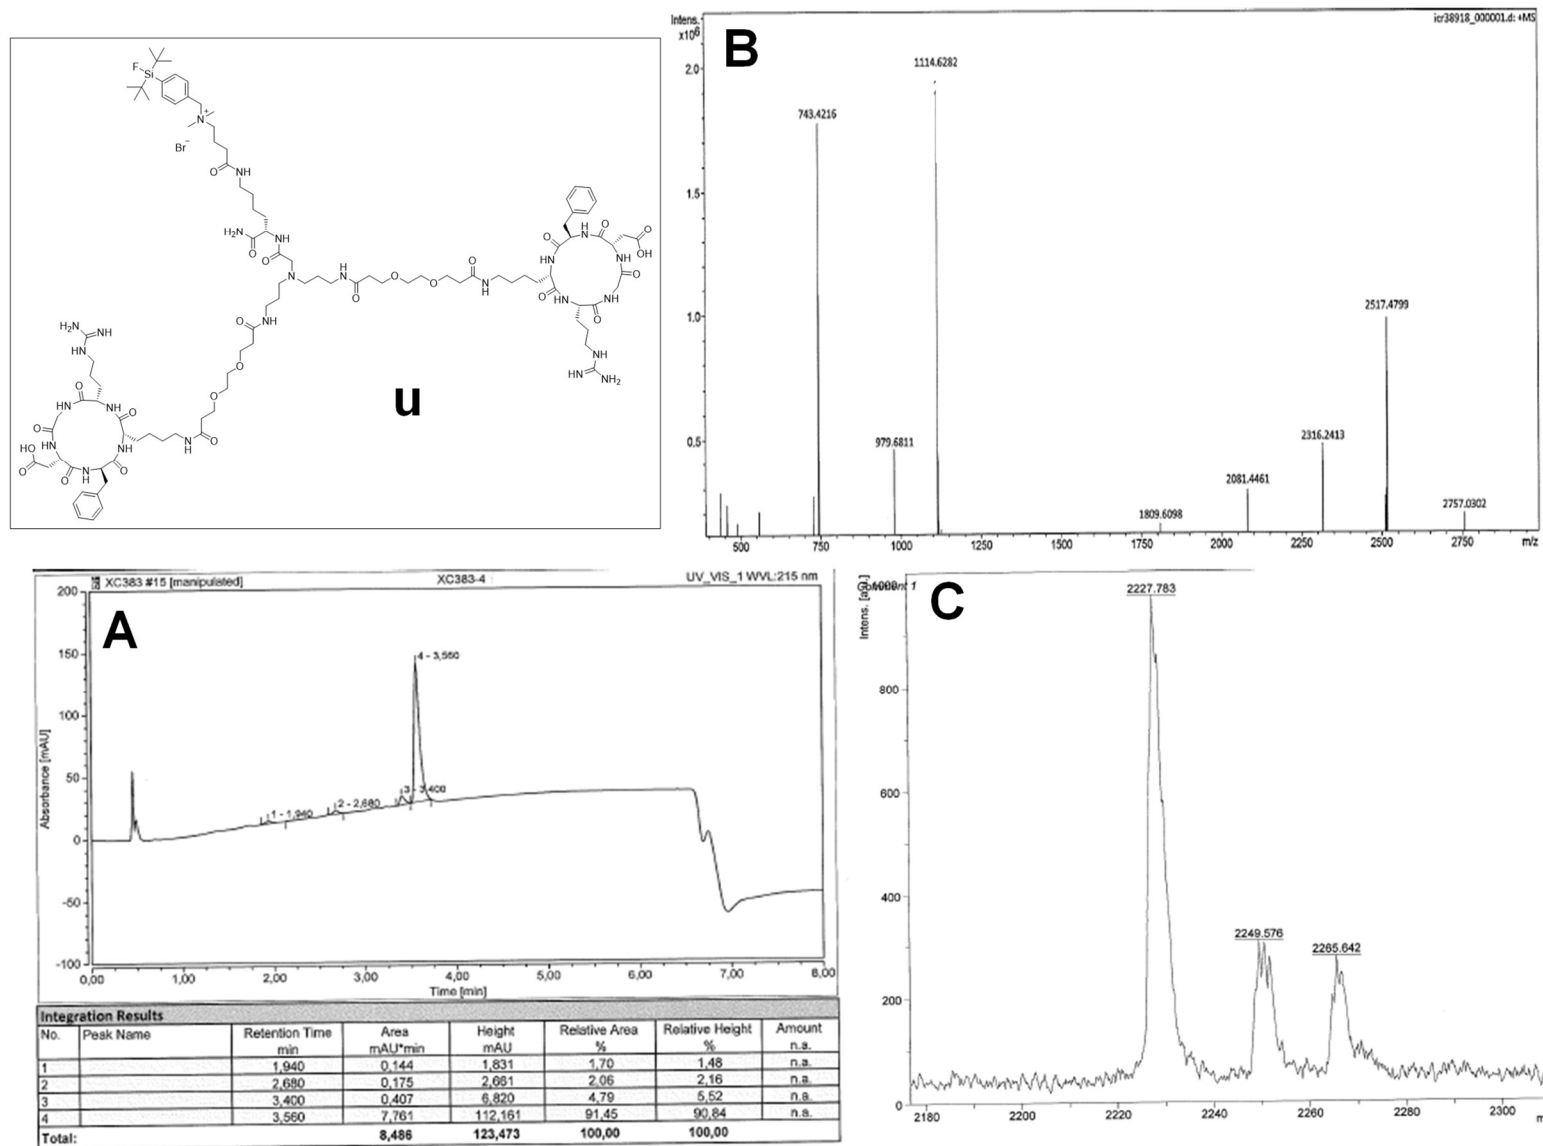

Figure S85. HPLC chromatogram (A) and mass spectra (B: ESI, C: MALDI) of SiFA/in-APG-[PEG<sub>1</sub>-c(RGDfK)]<sub>2</sub> (**u**).

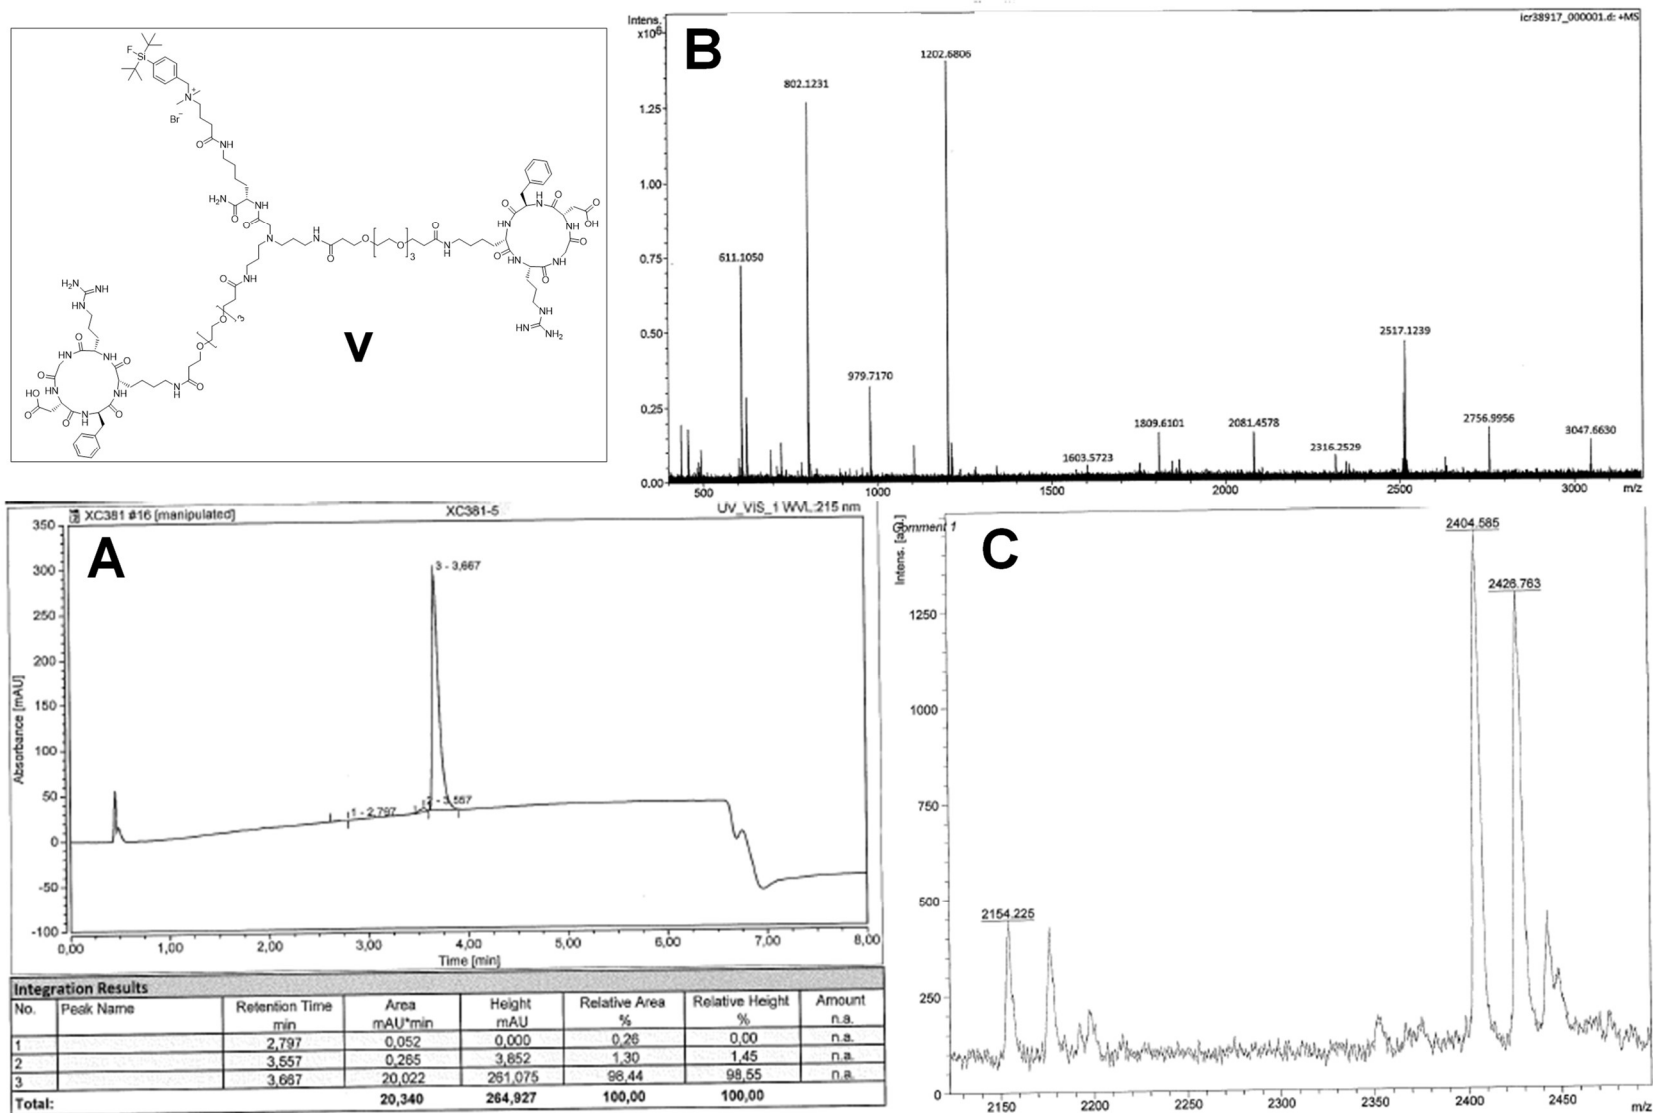

Figure S86. HPLC chromatogram (**A**) and mass spectra (**B**: ESI, **C**: MALDI) of SiFalin-APG-[PEG<sub>3</sub>-c(RGDfK)]<sub>2</sub> (**V**).

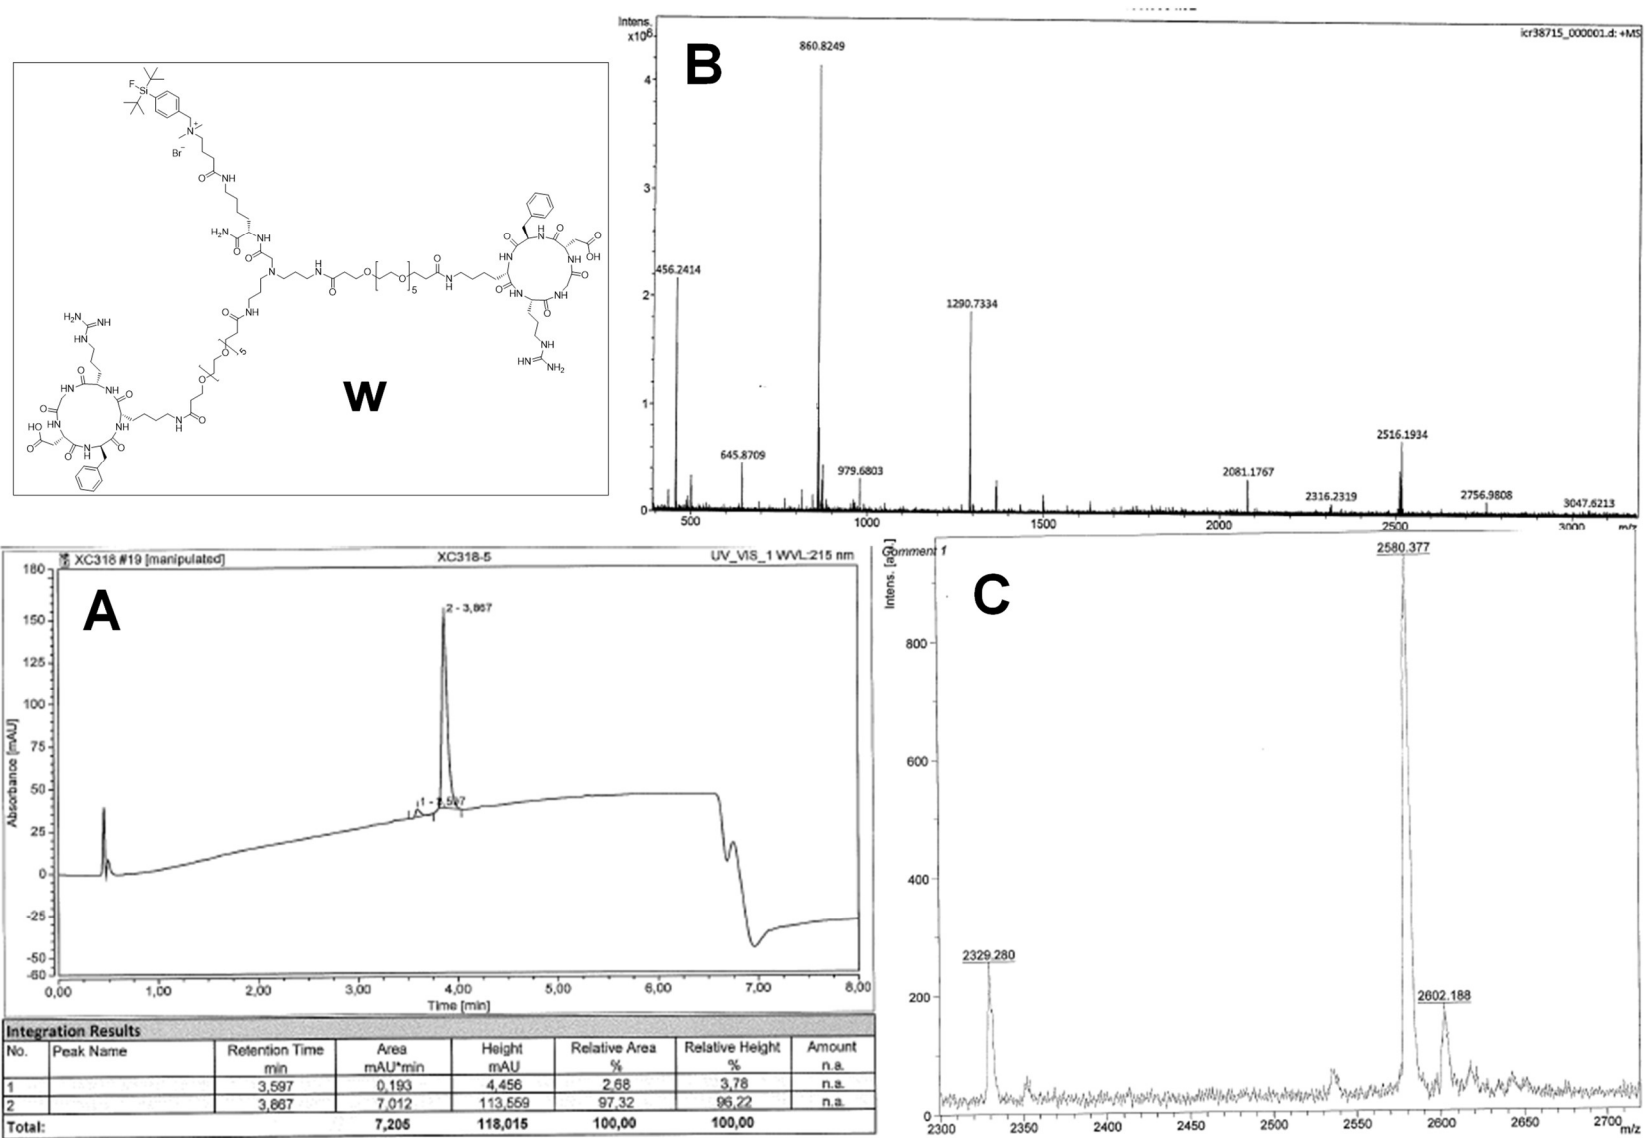

Figure S87. HPLC chromatogram (**A**) and mass spectra (**B**: ESI, **C**: MALDI) of SiFalin-APG-[PEG<sub>5</sub>-c(RGDfK)]<sub>2</sub> (**W**).

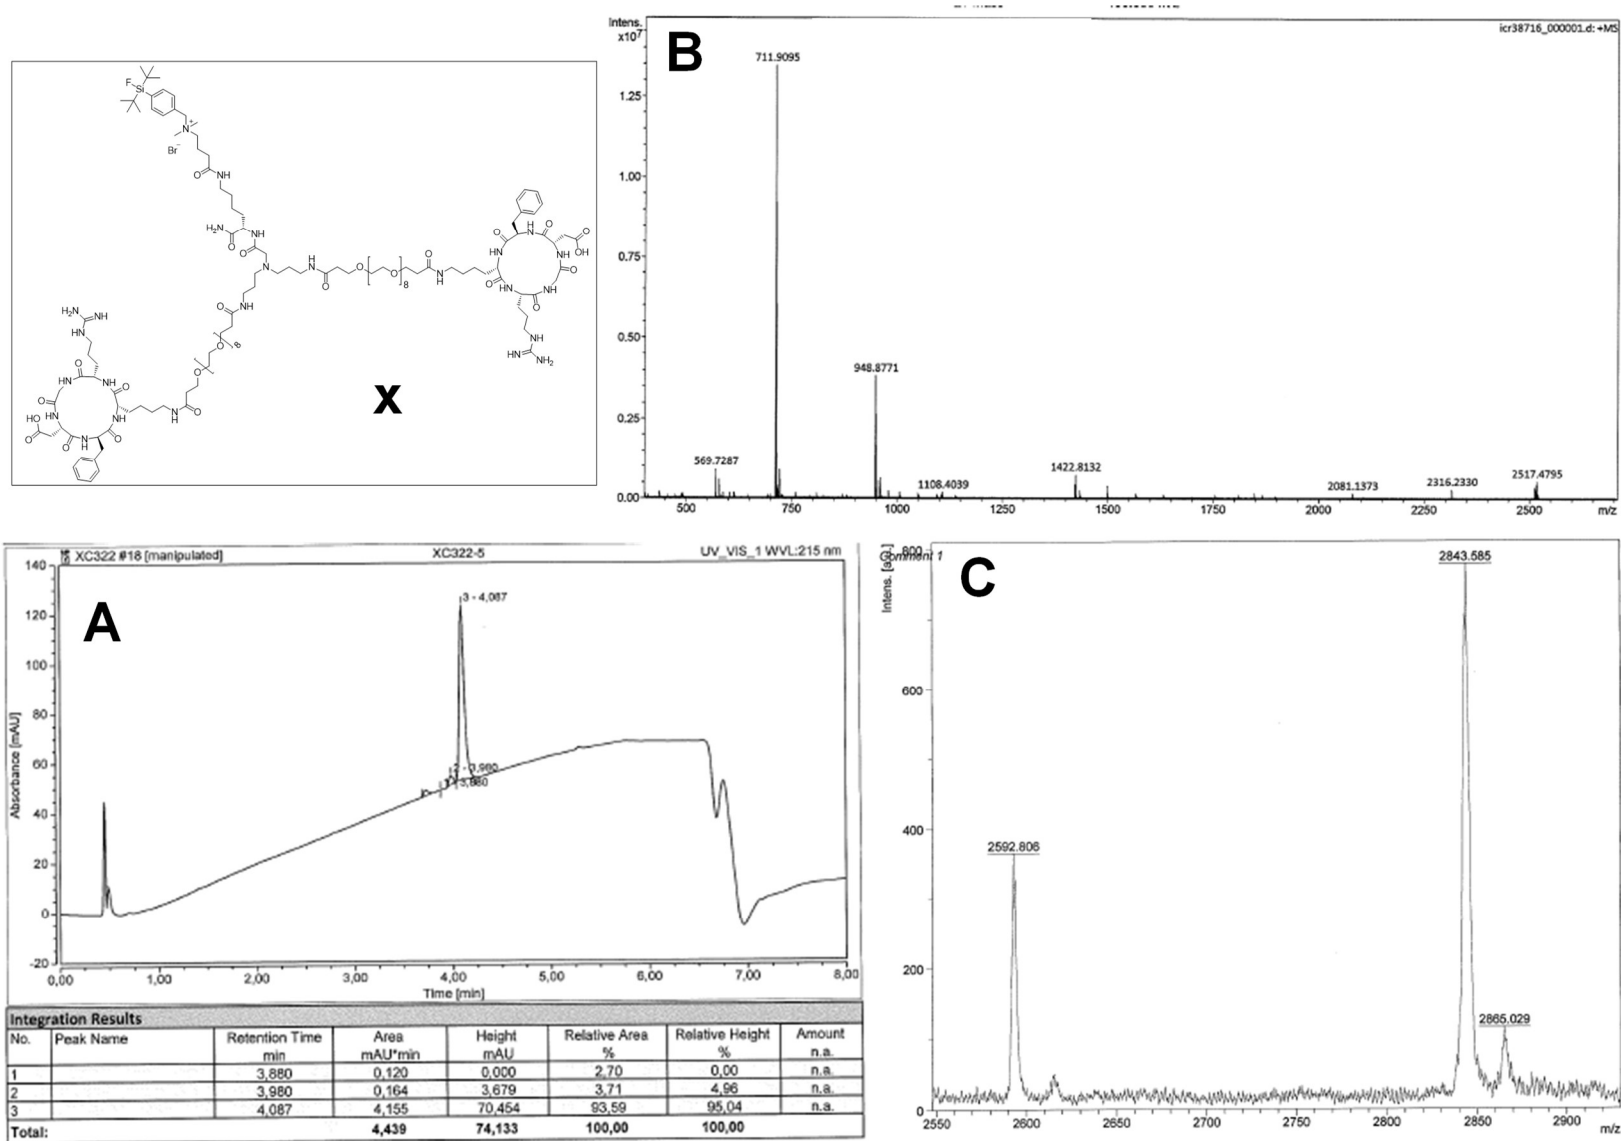

Figure S88. HPLC chromatogram (**A**) and mass spectra (**B**: ESI, **C**: MALDI) of SiFAlin-APG-[PEG<sub>8</sub>-c(RGDfK)]<sub>2</sub> (**x**).

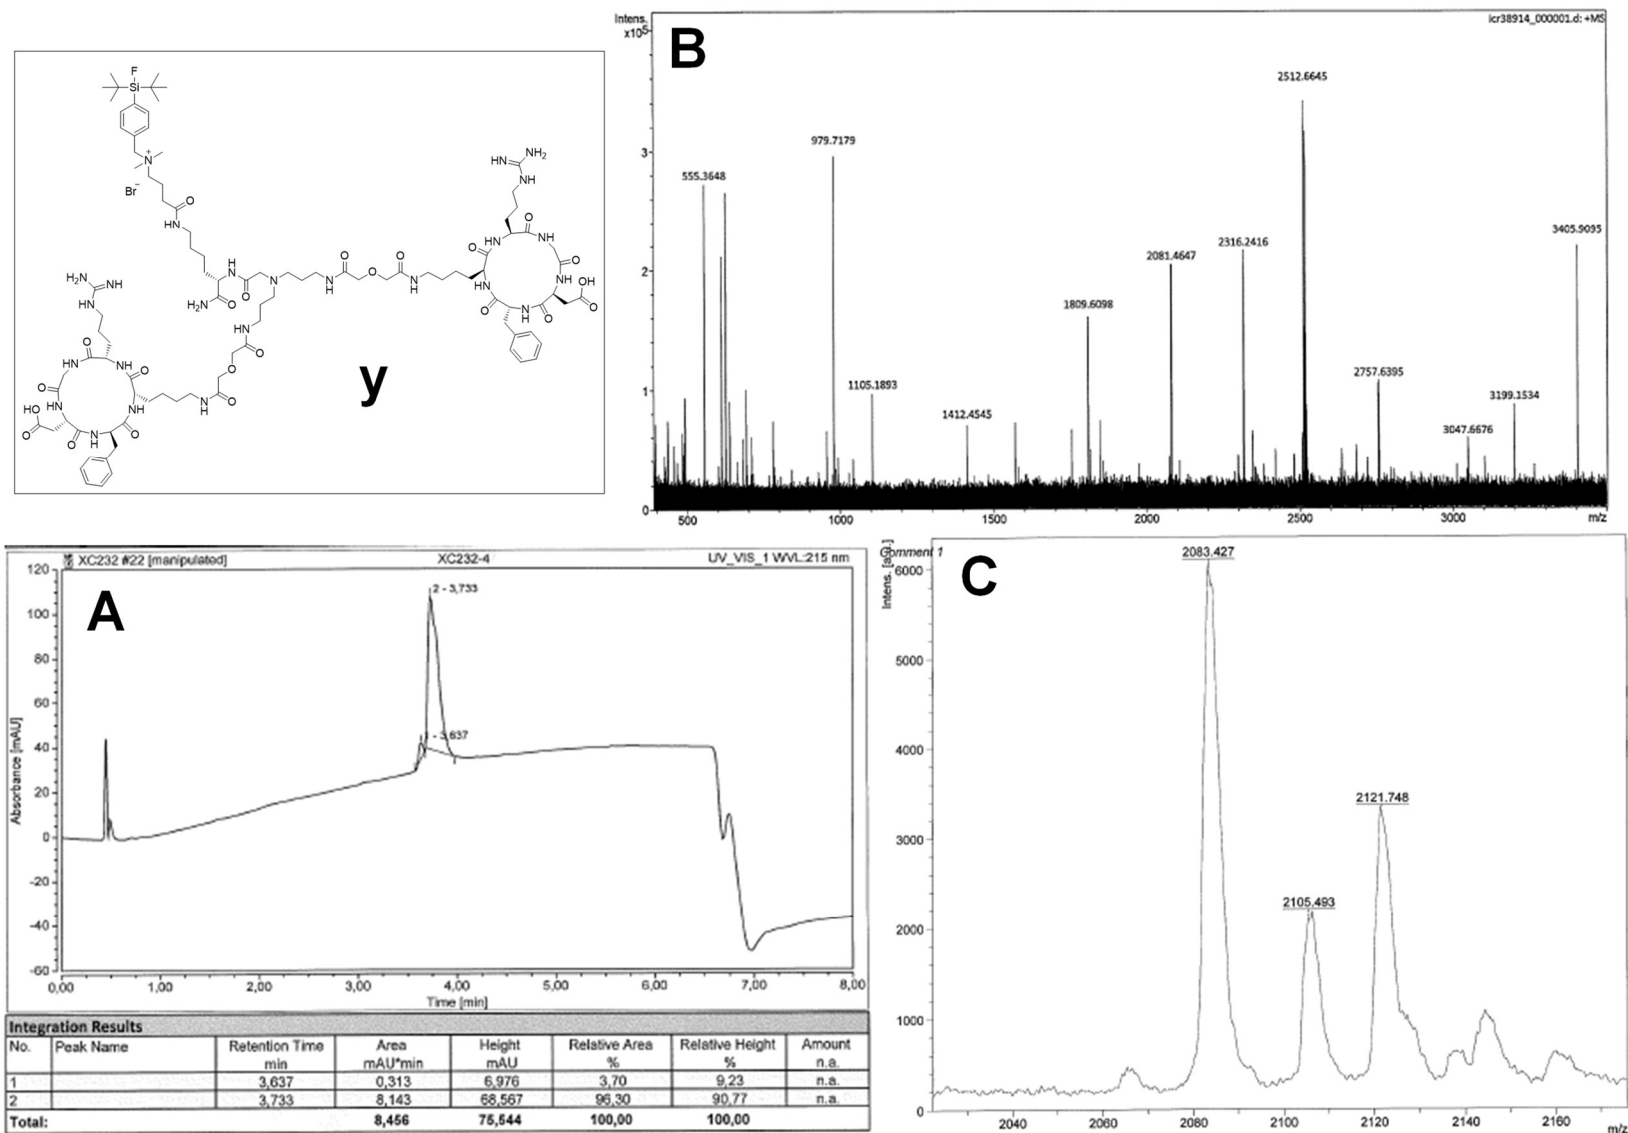

Figure S89. HPLC chromatogram (A) and mass spectra (B: ESI, C: MALDI) of SiFAlin-APG-[DIG-c(RGDfK)]<sub>2</sub> (*y*).



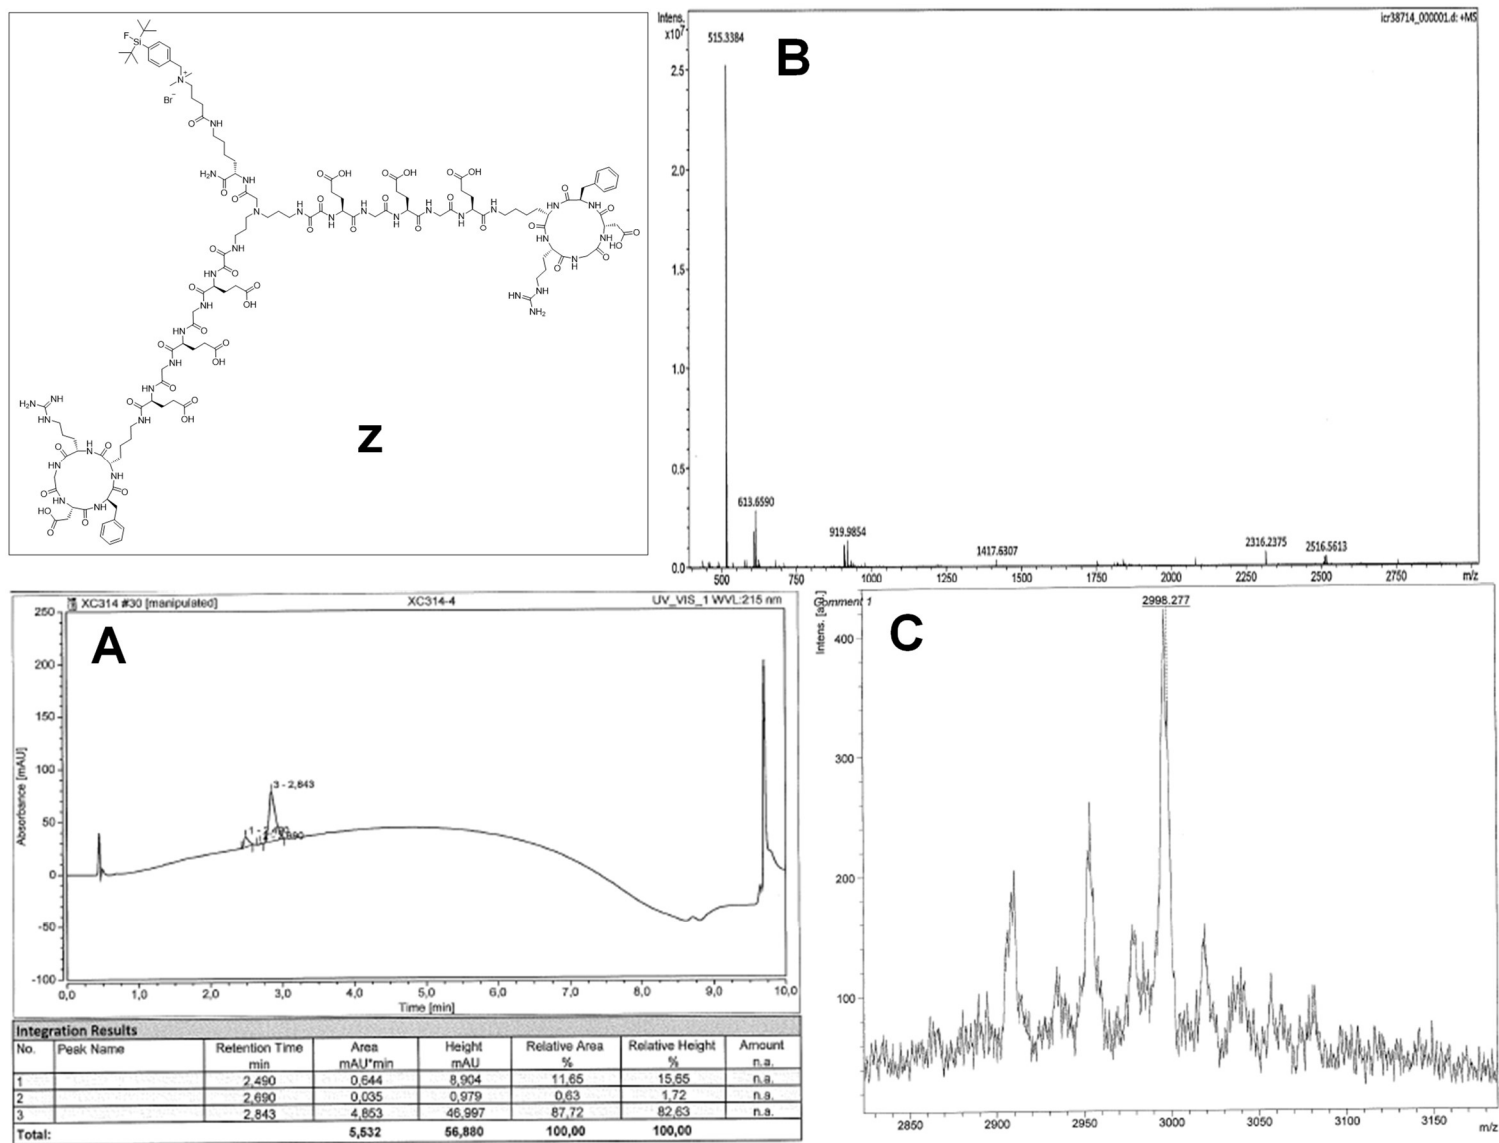

Figure S90. HPLC chromatogram (A) and mass spectra (B: ESI, C: MALDI) of SiFAlin-APG-[Ox-EGEGE-c(RGDfK)]<sub>2</sub> (Z).

## 5. Radio-HPLC chromatograms of [ $^{18}\text{F}$ ]-[ $^{18}\text{F}$ ]-6 from the investigation regarding serum stability

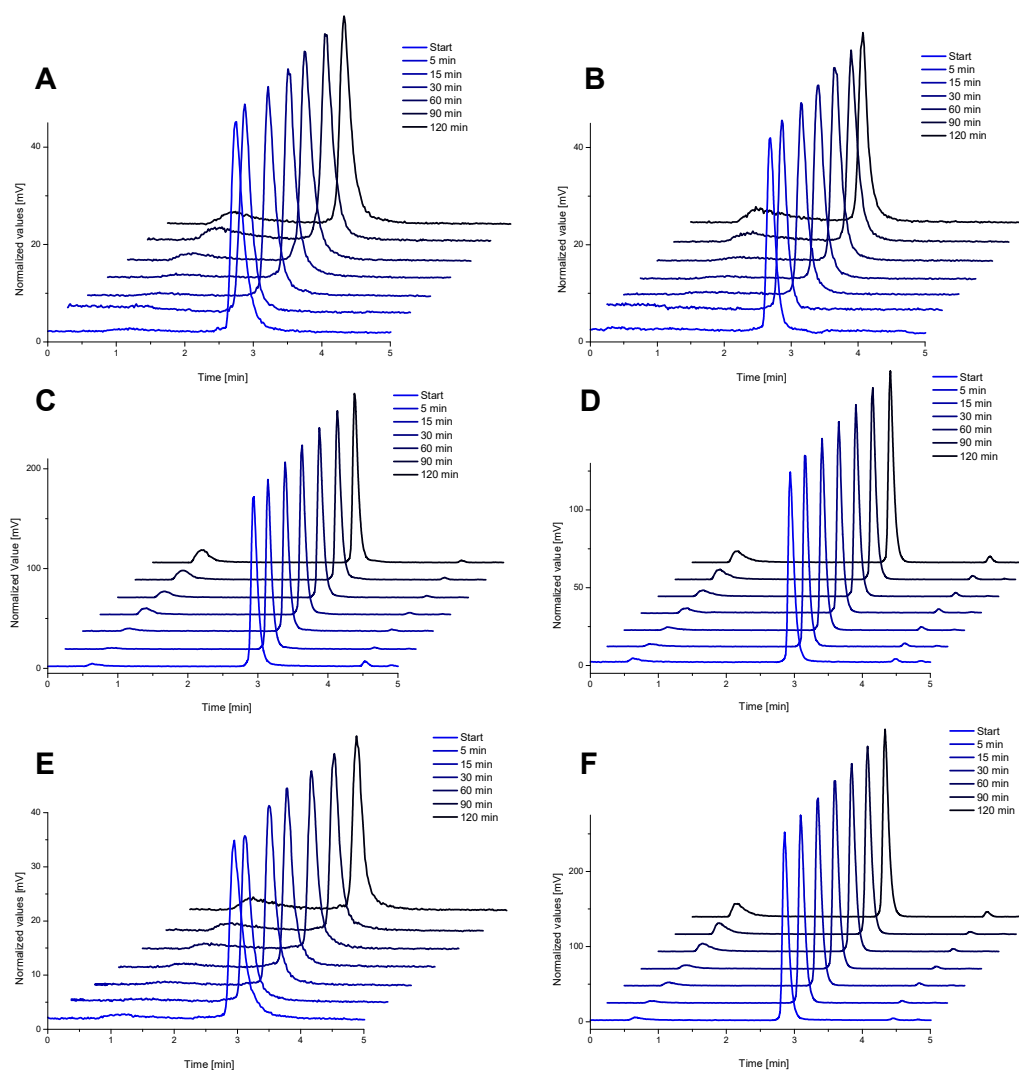

Figure S91. Depiction of the radio-HPLC chromatograms for [ $^{18}\text{F}$ ]-1 – [ $^{18}\text{F}$ ]-6 at certain time points. **A** [ $^{18}\text{F}$ ]-1; **B** [ $^{18}\text{F}$ ]-2; **C** [ $^{18}\text{F}$ ]-3; **D** [ $^{18}\text{F}$ ]-4; **E** [ $^{18}\text{F}$ ]-5; **F** [ $^{18}\text{F}$ ]-6.

## 6. Binding curves of the monomeric peptides c(RGDfK) and GG-Nle-c(DHfRWK)

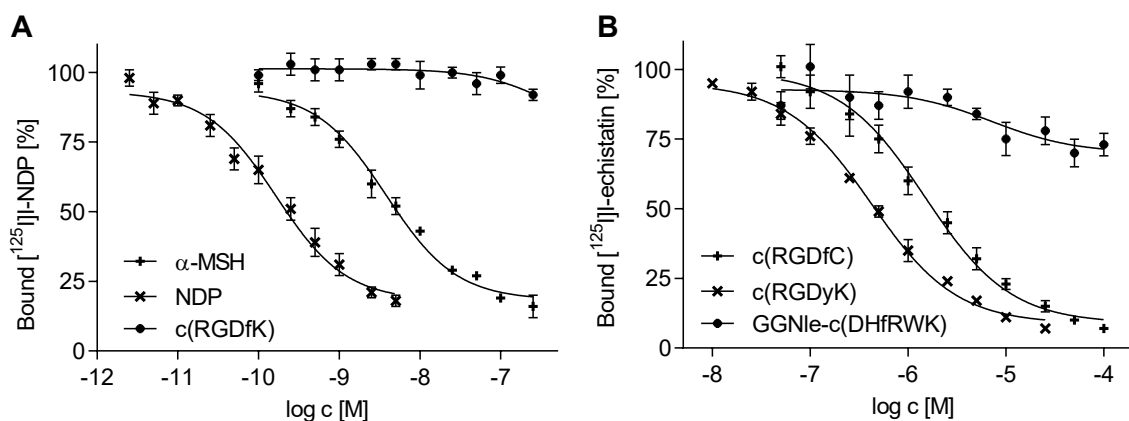

Figure S92. Depiction of the determined binding curves of c(RGDfK) on MC1R-positive B16F10-cells (**A**) and GG-Nle-c(DHfRWK) on  $\alpha_3\beta_3$ -positive U87MG-cells (**B**). Values are depicted as mean ( $n = 9$ ), error bars represent SD.

## 7. *Ex vivo* biodistribution data of [<sup>18</sup>F]2 and [<sup>18</sup>F]4

Table S1. Determined ID/g-values of *ex vivo* biodistribution data of [<sup>18</sup>F]2 and [<sup>18</sup>F]4. Values are given as mean (n = 3) ± SD.

| Tissue          | ID/g ([ <sup>18</sup> F]2) [%] |                 |                      |                    | ID/g ([ <sup>18</sup> F]4) [%] |                 |                      |                    |
|-----------------|--------------------------------|-----------------|----------------------|--------------------|--------------------------------|-----------------|----------------------|--------------------|
|                 | [ <sup>18</sup> F]2            | NDP<br>blocking | c(RGDyK)<br>blocking | double<br>blocking | [ <sup>18</sup> F]4            | NDP<br>blocking | c(RGDyK)<br>blocking | double<br>blocking |
| blood           | 0.99 ± 0.23                    | 0.84 ± 0.12     | 1.14 ± 0.15          | 1.13 ± 0.10        | 0.59 ± 0.08                    | 2.07 ± 0.94     | 0.83 ± 0.06          | 1.00 ± 0.15        |
| spleen          | 2.73 ± 0.85                    | 2.75 ± 0.55     | 0.94 ± 0.19          | 1.07 ± 0.32        | 1.79 ± 0.31                    | 1.51 ± 0.15     | 1.71 ± 0.62          | 0.69 ± 0.10        |
| liver           | 17.20 ± 6.58                   | 14.88 ± 5.07    | 4.94 ± 1.39          | 8.50 ± 2.71        | 8.30 ± 2.77                    | 5.16 ± 0.56     | 10.37 ± 3.65         | 4.04 ± 1.06        |
| kidneys         | 13.24 ± 3.57                   | 17.27 ± 2.08    | 12.09 ± 2.30         | 24.02 ± 6.34       | 7.72 ± 2.57                    | 23.11 ± 4.97    | 21.35 ± 4.04         | 26.54 ± 6.59       |
| pancreas        | 0.91 ± 0.29                    | 0.80 ± 0.15     | 0.36 ± 0.04          | 0.55 ± 0.15        | 0.25 ± 0.08                    | 0.52 ± 0.12     | 0.66 ± 0.19          | 0.32 ± 0.04        |
| lung            | 2.89 ± 1.04                    | 2.98 ± 0.87     | 1.07 ± 0.15          | 1.30 ± 0.36        | 3.45 ± 1.15                    | 1.25 ± 0.06     | 2.75 ± 1.04          | 0.88 ± 0.14        |
| heart           | 1.24 ± 0.36                    | 1.06 ± 0.31     | 0.62 ± 0.09          | 0.93 ± 0.18        | 0.56 ± 0.19                    | 0.73 ± 0.06     | 1.51 ± 0.57          | 0.52 ± 0.06        |
| brain           | 0.18 ± 0.02                    | 0.13 ± 0.03     | 0.13 ± 0.05          | 0.07 ± 0.01        | 0.10 ± 0.03                    | 0.19 ± 0.07     | 0.07 ± 0.02          | 0.07 ± 0.01        |
| bone            | 8.01 ± 3.48                    | 9.74 ± 2.85     | 4.12 ± 0.73          | 4.47 ± 1.57        | 18.07 ± 6.02                   | 4.61 ± 0.71     | 4.99 ± 0.71          | 2.99 ± 0.78        |
| muscle          | 4.37 ± 2.58                    | 1.37 ± 0.26     | 0.38 ± 0.04          | 0.34 ± 0.07        | 0.07 ± 0.02                    | 0.63 ± 0.07     | 1.62 ± 0.42          | 2.58 ± 1.28        |
| tail            | 37.99 ± 14.37                  | 37.64 ± 8.67    | 68.98 ± 3.84         | 53.33 ± 12.82      | 25.29 ± 8.43                   | 52.78 ± 5.59    | 44.27 ± 12.11        | 55.60 ± 7.12       |
| B16F10 tumor    | 2.32 ± 0.49                    | 1.83 ± 0.24     | 1.98 ± 0.18          | 1.14 ± 0.42        | 2.58 ± 0.86                    | 1.33 ± 0.27     | 2.29 ± 0.24          | 2.49 ± 0.09        |
| U87MG tumor     | 2.33 ± 0.46                    | 3.19 ± 0.33     | 1.48 ± 0.12          | 1.00 ± 0.11        | 3.92 ± 1.31                    | 2.53 ± 0.15     | 2.67 ± 0.66          | 0.90 ± 0.05        |
| stomach         | 1.56 ± 0.29                    | 1.52 ± 0.31     | 0.54 ± 0.04          | 0.54 ± 0.12        | 0.38 ± 0.13                    | 1.03 ± 0.11     | 0.99 ± 0.16          | 0.42 ± 0.03        |
| small intestine | 2.46 ± 1.77                    | 2.75 ± 0.36     | 0.75 ± 0.11          | 0.90 ± 0.23        | 0.07 ± 0.02                    | 1.60 ± 0.26     | 1.46 ± 0.53          | 0.54 ± 0.08        |
| colon           | 1.58 ± 0.44                    | 1.44 ± 0.34     | 0.50 ± 0.07          | 0.63 ± 0.20        | 0.77 ± 0.26                    | 0.96 ± 0.13     | 0.80 ± 0.32          | 0.42 ± 0.05        |

Table S2. Determined tumor-to-blood, tumor-to-muscle, tumor-to-liver, and tumor-to-kidney ratios of [ $^{18}\text{F}$ ]2 and [ $^{18}\text{F}$ ]4. Values are given as mean (n = 3)  $\pm$  SD. Asterisks indicate statistically significant values (\*: p < 0.05, \*\*: p < 0.01 and \*\*\*: p < 0.001).

| Ratio         | [ $^{18}\text{F}$ ]2 |                 | [ $^{18}\text{F}$ ]4 |                     |
|---------------|----------------------|-----------------|----------------------|---------------------|
|               | B16F10               | U87MG           | B16F10               | U87MG               |
| tumor/blood   | 2.42 $\pm$ 0.73      | 2.40 $\pm$ 0.67 | 4.36 $\pm$ 1.37      | 5.08 $\pm$ 0.75**   |
| tumor/muscle  | 0.68 $\pm$ 0.41      | 0.79 $\pm$ 0.66 | 38.56 $\pm$ 9.24**   | 45.72 $\pm$ 8.62*** |
| tumor/liver   | 0.16 $\pm$ 0.11      | 0.14 $\pm$ 0.03 | 0.36 $\pm$ 0.23      | 0.39 $\pm$ 0.14     |
| tumor/kidneys | 0.19 $\pm$ 0.10      | 0.18 $\pm$ 0.02 | 0.38 $\pm$ 0.24      | 0.40 $\pm$ 0.07**   |

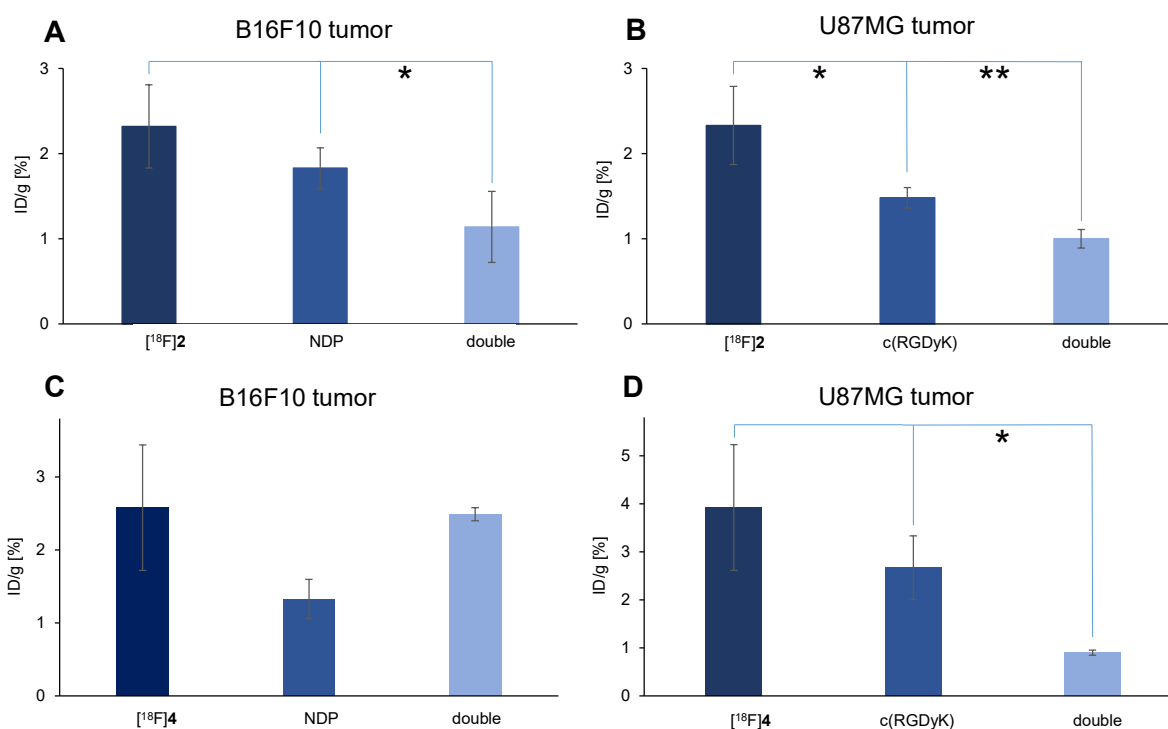

Figure S93. Depiction of tumor uptake of [ $^{18}\text{F}$ ]2 and [ $^{18}\text{F}$ ]4 with the respective blocking substances. **A** [ $^{18}\text{F}$ ]2 in B16F10 tumor; **B** [ $^{18}\text{F}$ ]2 in U87MG tumor; **C** [ $^{18}\text{F}$ ]4 in B16F10 tumor; **D** [ $^{18}\text{F}$ ]4 in U87MG tumor. Values are depicted as mean (n = 3), error bars represent SD.
